# Supplementary material for: Assessment of the effects of decision aids about breast cancer screening: a systematic review and meta-analysis
Source: PubMed Central journal article supplement — BMJ Open. 2017 Oct 6;7(10):e016894. doi: 10.1136/bmjopen-2017-016894 (PMC5640065; doi:10.1136/bmjopen-2017-016894), 2017-10-06
Supplement: bmjopen-2017-016894.draft_revisions.pdf [file bmjopen-2017-016894.draft_revisions.pdf]

# BMJ Open

BMJ Open is committed to open peer review. As part of this commitment we make the peer review history of every article we publish publicly available.

When an article is published we post the peer reviewers' comments and the authors' responses online. We also post the versions of the paper that were used during peer review. These are the versions that the peer review comments apply to.

The versions of the paper that follow are the versions that were submitted during the peer review process. They are not the versions of record or the final published versions. They should not be cited or distributed as the published version of this manuscript.

BMJ Open is an open access journal and the full, final, typeset and author-corrected version of record of the manuscript is available on our site with no access controls, subscription charges or pay-per-view fees (<http://bmjopen.bmj.com>).

If you have any questions on BMJ Open's open peer review process please email [editorial.bmjopen@bmj.com](mailto:editorial.bmjopen@bmj.com)

# BMJ Open

## Assessment of the impact of decision aids on breast cancer screening. A systematic review

|                                 |                                                                                                                                                                                                                                                                                                                                                                                                                                                                                                                                                                           |
|---------------------------------|---------------------------------------------------------------------------------------------------------------------------------------------------------------------------------------------------------------------------------------------------------------------------------------------------------------------------------------------------------------------------------------------------------------------------------------------------------------------------------------------------------------------------------------------------------------------------|
| Journal:                        | <i>BMJ Open</i>                                                                                                                                                                                                                                                                                                                                                                                                                                                                                                                                                           |
| Manuscript ID                   | bmjopen-2017-016894                                                                                                                                                                                                                                                                                                                                                                                                                                                                                                                                                       |
| Article Type:                   | Research                                                                                                                                                                                                                                                                                                                                                                                                                                                                                                                                                                  |
| Date Submitted by the Author:   | 17-Mar-2017                                                                                                                                                                                                                                                                                                                                                                                                                                                                                                                                                               |
| Complete List of Authors:       | Martinez-Alonso, Montserrat; University of Lleida-IRBLLEIDA, Basic Medical Sciences<br>Carles-Lavila, Misericòrdia; University Rovira i Virgili, Economics; Research Centre on Industrial and Public Economics (CREIP)<br>Pérez-Lacasta, María José; University Rovira i Virgili, Economics<br>Pons-Rodriguez, Anna; Lleida Biomedical Research Institut (IRBLLEIDA)<br>Garcia, Montse; Catalan Institute of Oncology-IDIBELL<br>Rue, Montserrat; University of Lleida-IRBLLEIDA, Basic Medical Sciences; Health Services Research on Chronic Patients Network (REDISSEC) |
| <b>Primary Subject Heading</b>: | Communication                                                                                                                                                                                                                                                                                                                                                                                                                                                                                                                                                             |
| Secondary Subject Heading:      | Health services research, Health policy, Oncology, Public health                                                                                                                                                                                                                                                                                                                                                                                                                                                                                                          |
| Keywords:                       | breast cancer, decision aid, mammography, screening, shared decision making                                                                                                                                                                                                                                                                                                                                                                                                                                                                                               |
|                                 |                                                                                                                                                                                                                                                                                                                                                                                                                                                                                                                                                                           |

SCHOLARONE™  
Manuscripts

Only

1  
2  
3  
4  
5  
6  
7  
8  
9  
10  
11  
12  
13  
14  
15  
16  
17  
18  
19  
20  
21  
22  
23  
24  
25  
26  
27  
28  
29  
30  
31  
32  
33  
34  
35  
36  
37  
38  
39  
40  
41  
42  
43  
44  
45  
46  
47  
48  
49  
50  
51  
52  
53  
54  
55  
56  
57  
58  
59  
60

## Assessment of the impact of decision aids on breast cancer screening: A systematic review

Montserrat Martínez-Alonso<sup>1,5</sup>, Misericòrdia Carles-Lavila<sup>2,5,6</sup>, Maria José Pérez-Lacasta<sup>2,5</sup>, Anna Pons-Rodríguez<sup>3</sup>, Montse Garcia<sup>4</sup>, Montserrat Rué<sup>1,5,7</sup>, on behalf of the InforMa Group

<sup>1</sup> Department of Basic Medical Sciences, University of Lleida-IRBLLEIDA, Avda. Rovira Roure 80, 25198 Lleida, Spain

<sup>2</sup> Department of Economics, University Rovira i Virgili, Avda. Universitat 1, 43204 Reus, Spain

<sup>3</sup> Lleida Biomedical Research Institut (IRBLLEIDA), Avda. Rovira Roure 80, 25198, Lleida, Spain

<sup>4</sup> Cancer Prevention and Control Program, Catalan Institute of Oncology-IDIBELL, Gran Via de L'Hospitalet 199-203, 08908 L'Hospitalet de Llobregat, Spain

<sup>5</sup> Research Group on Economic Evaluation and Health (GRAES), Reus, Spain

<sup>6</sup> Research Centre on Industrial and Public Economics, (CREIP), Reus, Spain.

<sup>7</sup> Health Services Research on Chronic Patients Network (REDISSEC), Madrid, Spain

Correspondence to: professor Montserrat Rué, Basic Medical Sciences department, University of Lleida, Biomedicina II, Avda. Rovira Roure 80, 25198 Lleida, Spain. e-mail: montse.rue@cmb.udl.cat, phone: +34 973 702441.

Word count: 3,635 words

## ABSTRACT

**Objective:** The aim of this systematic review of randomised controlled trials (RCTs) and observational studies is to assess the effect of decision aids (DA) in women facing the decision to be screened for breast cancer.

**Setting:** Screening for breast cancer.

**Intervention:** DA aimed to help women make a deliberative choice regarding participation in mammography screening by providing information on the options and outcomes.

**Primary and secondary outcomes:** The main outcome measures were informed choice, decisional conflict, and knowledge. Secondary outcomes were values, attitudes, uncertainty, and the final participation intention in breast cancer screening.

**Results:** A total of 607 studies were identified, but only three randomized controlled studies and one before-after study were selected. DA increased the proportion of women taking an informed decision. Confidence in the decision was lower in the intervention group. The use of a DA provided a higher level of knowledge according to all studies and only one study noted a decrease in the intention of screening.

**Conclusions:** Tools to aid decision-making in screening for breast cancer improve knowledge and promote informed decision, although this benefit is not free of decisional conflict and loss of confidence. Under the current paradigm change, that values informed choice rather than maximising uptake, more research is necessary for the improvement of DA.

**Keywords:** breast cancer, decision aid, mammography, screening, shared decision making.

### Strengths and limitations of this study

- This is the first systematic review focused in the impact of DA on breast cancer screening.

- DA for breast cancer screening produce a significant improvement in knowledge and contribute to a significant increase of the frequency of women making an informed choice.
- Decision aids do not affect decision conflict, decision confidence and positive attitudes towards screening.
- The limitations of the study are related mainly with the generalization of the results.
- One of the limitations is that women included in the studies probably had a higher education level, greater health awareness, and were more actively involved in health care decisions, than women in the general population.

## INTRODUCTION

In Western countries screening for breast cancer spread during the 1990s. There was a general consensus on the benefits of screening since several clinical trials in the US and Northern Europe estimated a statistically significant and clinically relevant reduction of mortality from breast cancer<sup>1</sup>. But, in the year 2000 the systematic review from Gotzsche et al. started a hot debate, still alive, on the relevance and magnitude of benefits and harms of breast cancer screening<sup>2</sup>.

More than two decades after the introduction of breast cancer mass screening, the evidence on the harm-benefit balance remains inconclusive. On the one hand, advances in adjuvant treatments, a multidisciplinary approach for breast cancer treatment, and earlier identification of symptoms by women, have diminished the impact of screening on breast cancer mortality reduction<sup>3</sup>. On the other hand, the evidence on adverse effects of screening, characterized by a high consensus on the risk of false positive results and lack of agreement on the size of overdiagnosis and overtreatment, show that the potential harms of screening are not insignificant<sup>4,5</sup>.

The current prevailing paradigm, which encourages participation, is changing. Two proposals are gaining strength. First, the need to inform women of potential benefits and harms of screening. Some propose not devoting more energy to increase participation but dedicating it to inform women to make the best decision based on their preferences and values<sup>6-9</sup>. Second, customizing the screening strategies to individual risk. Some recent studies<sup>10-12</sup> based on mathematical models suggest that risk-based screening may increase benefits and reduce harms. The literature shows that both proposals are gaining strength<sup>13,14</sup>.

Decision aids (DA) are instruments that communicate evidence-based information on benefits and harms of different health-care options to help people make informed choices. According to Stacey et al.<sup>15</sup>, DA can help patients to clarify the value they place on benefits, harms, and scientific uncertainties. The Stacey work<sup>15</sup>, a recently updated Cochrane systematic review on DA for people facing treatment or screening decisions, included 115 published randomized controlled trials of DA, 26 of them

1  
2  
3 were about cancer screening (13 prostate, 10 colon, 2 breast, and 1 cervix) and 7 on  
4 breast cancer genetic testing. The authors concluded that here was high-quality  
5 evidence that DA compared to usual care improve people's knowledge regarding  
6 options, and reduce their decisional conflict related to feeling uninformed and unclear  
7 about their personal values. There was moderate-quality evidence that DA stimulate  
8 people to take a more active role in decision making, and improve accurate risk  
9 perceptions when probabilities are included in DA, compared to not being included.  
10 Finally, there was low-quality evidence that DA improve congruence between the  
11 chosen option and the patient's values.  
12  
13  
14  
15  
16  
17  
18  
19

20 Information on cancer screening is often biased, incomplete and persuasive<sup>16</sup>. Some  
21 leaflets mention the possibility of harms however do not quantify them. In Europe,  
22 some organizations are providing information on benefits and harms of breast cancer  
23 screening, in particular, estimates of mortality reduction, and frequency of false  
24 positive results of mammography and invasive tests (e.g. Cochrane collaboration, UK  
25 NHS Breast Screening Programme; German Institute for Quality and Efficiency in  
26 Health Care; Fundació Lliga per a la Investigació i Prevenció del Càncer and Agència de  
27 Salut Pública de Barcelona, in Catalonia (Spain)). Information on overdiagnosis  
28 appears in some of the information materials. Two recent studies<sup>8,17</sup> have compared  
29 the impact of adding information on overdiagnosis to support informed choice on  
30 breast cancer screening. Prior to the initiation of a randomized controlled study on  
31 the effect of a DA in mass screening in two regions of Spain, we aimed to identify and  
32 summarize all the studies reporting the description and assessment of a DA when  
33 applied to women facing the decision to be screened with mammography in a  
34 population-based screening or opportunistic case-finding framework. We expected to  
35 find that DA improve knowledge of options, benefits, and harms; create accurate  
36 perceptions of benefits and harms; reduce decisional conflict; and enhance informed  
37 choice.  
38  
39  
40  
41  
42  
43  
44  
45  
46  
47  
48  
49  
50  
51  
52  
53  
54  
55  
56  
57  
58  
59  
60

## METHODS

### Eligibility criteria

#### Types of studies

We included all the published studies with randomized controlled trial (RCT) or before-after designs that compared DA to no intervention, usual care, or alternative interventions. The search date upper limit was December 31, 2016.

#### Types of participants

Participants were women facing decisions about screening in a population-based screening or opportunistic case-finding framework within the age interval of recommended mammography screening. We excluded studies aimed at elderly women only, and studies where participants were asked to make hypothetical choices.

#### Types of interventions

DA were defined as interventions aimed to help women make a deliberative choice regarding participation in mammography screening, by providing information on the options and outcomes. We excluded studies aimed at increasing participation or promoting adherence, and studies not carried out in a real context of women facing the decision.

#### Types of outcome measures

The primary outcomes were: informed choice based on values, decisional conflict and/or confidence, and knowledge. The secondary outcomes included: values and/or attitudes towards screening, proportion remaining undecided, and proportion reporting screening participation intention.

#### Language

We included articles reported in any language.



## Information sources

### Search methods for identification of studies

The search strategy was performed in MEDLINE and SCOPUS and adapted and replicated in EMBASE, CINAHL, PsycInfo, and Cochrane Library Plus. The search included the key words “breast cancer” and “decision” (or “choice”) and “aid” (or “informed”) and “mammography” (or “mammogram”), within the paper title or the abstract. It excluded the key word “protocol” from the paper titles and allowed synonyms and free suffixes and prefixes. The reviews identified by this search, as well as the references that they included, were exhaustively used to refine the search strategy to ensure that all the possible relevant references for our review were identified (see online supplementary appendix 1).

## Study selection and synthesis of results

All the studies satisfying the inclusion and exclusion criteria referred to design, participants and interventions were included in this review. Their selection and risk of bias assessment was independently conducted in pairs by four reviewers (MC, MJP, MMA, and MR). In case of disagreement, studies were discussed by the whole team of reviewers till an agreement was reached.

### Data extraction

The data extraction for the selected studies was independently conducted by two reviewers (MMA and MR) and a consensus version was obtained. In case of data needed, that was not shown in the articles, the corresponding authors were contacted.

### Risk of bias of individual studies

For the risk of bias assessment of randomized comparative studies, the *Cochrane risk of bias* tool for randomized controlled trials was used. In case of non-randomized controlled trials, the selection, allocation and blinding assessment were not

1  
2  
3 applicable. The sampling bias (a problem for external validity) was assessed in all the  
4 included studies.  
5  
6

7  
8 The risk of bias (*low, unclear, or high*) was assessed considering the study design and  
9 the methodological quality of the studies. Data consistency was rated as *no*  
10 *inconsistency, inconsistency present, or not applicable* if there was only one study  
11 available, considering each outcome's direction, magnitude, and statistical significance  
12 through the included studies. The assessment methods followed the AHRQ "Methods  
13 Guide for Effectiveness and Comparative Effectiveness Reviews"  
14 ([www.effectivehealthcare.ahrq.gov/](http://www.effectivehealthcare.ahrq.gov/)) and were in accordance with the Preferred  
15 Reporting Items for Systematic Reviews and Meta-analyses (PRISMA) checklist<sup>18</sup>.  
16  
17  
18  
19  
20  
21

## 22 23 Analysis of results 24

25  
26 For each endpoint of interest, the decision to combine the results of the selected  
27 studies in a meta-analysis was based on the heterogeneity of patient populations and  
28 interventions, as well as on methodological heterogeneity of study designs and  
29 reported outcomes.  
30  
31  
32

33  
34 If comparable measures were obtained, we pooled the data for the outcomes. To  
35 facilitate the data pooling, scores with different ranges (minimum and/or maximum  
36 values) were standardized to range from 0 to 100 points. We estimated a weighted  
37 effect intervention (with 95% confidence interval) as the difference between the  
38 intervention and control groups in experimental designs, and as changes in outcome  
39 measures post-intervention assessment from baseline in before-after studies. Mean  
40 differences or pooled relative risks (RR) were estimated for continuous or  
41 dichotomous outcomes, respectively.  
42  
43  
44  
45  
46  
47  
48  
49  
50  
51  
52  
53  
54  
55  
56  
57  
58  
59  
60

## RESULTS

### Study selection

In total, we identified 607 unique citations from the electronic database searches. Of these, only 14 were selected for evaluation of the inclusion and exclusion criteria. Figure 1 presents the flowchart of the study selection process. Ten studies were excluded after full text assessment (see Table S2.1 in the supplementary appendix 2 for details). Finally, three randomized controlled studies (Mathieu 2010<sup>19</sup>, Gummersbach 2015<sup>17</sup>, and Hersch 2015<sup>8</sup>, and one before-after study, Eden 2015,<sup>20</sup> were selected. These four studies involved a total of 1650 participants from four countries (Australia with two of them, Germany, and the United States of America).

### Study characteristics

Table 1 presents the studies' characteristics. Gummersbach and Hersch compared two DAs with information about the benefits and harms of mammography screening, providing the intervention group with more complete information. Whereas Gummersbach added more critical information in the harms of screening mammography in the intervention group, the DA in Hersch only differed in providing thorough information of over-detection or not. In contrast, Mathieu compared a DA with receiving no information, and Eden assessed changes after providing a DA.

Participants' characteristics are shown in Table 2. Means of age were located in the 40-50 yrs interval. There are differences between studies in the prevalence of previous mammograms and in education level.

**Table 1:** Description of the studies' characteristics

| Study            | Design                                              | Age group | Exclusion criteria                                                                                                                   | Decision aid (DA)                                                                                                                                                                                                                                                                      |
|------------------|-----------------------------------------------------|-----------|--------------------------------------------------------------------------------------------------------------------------------------|----------------------------------------------------------------------------------------------------------------------------------------------------------------------------------------------------------------------------------------------------------------------------------------|
| Mathieu 2010     | Randomized controlled study, pragmatic <sup>a</sup> | 38-45     | Personal history of breast cancer (BC)                                                                                               | Web-based DA, information on possible screening outcomes and worksheet to help weigh up and clarify preferences. Intervention group: immediate access; control group: delayed access after completing the outcome measures.                                                            |
| Eden 2015        | Before-after study, clinical                        | 40-49     | Personal history of BC, prior breast biopsy, high risk of BC <sup>b</sup> , previous mammography within 1 year, non-English speaking | Web-based DA, within 3 rural clinical settings, including BC information and questions for risk and self-preferences assessment.                                                                                                                                                       |
| Gummersbach 2015 | Randomized controlled study, primary care based     | 48-49     | None                                                                                                                                 | Mailed leaflet, more informative (specially on overdiagnosis) for the intervention group.                                                                                                                                                                                              |
| Hersch 2015      | Randomized controlled study, community-based        | 48-50     | Personal or strong family history of BC, BC risk higher than average, mammography in the past 2 years, non-English speaking          | Mailed DA, outcomes assessed by phone interview. Evidence-based explanatory and quantitative information on overdiagnosis, BC mortality reduction, and false positives for the intervention group vs. information on BC mortality reduction and false positives for the control group. |

<sup>a</sup>: The trial was advertised on the media. Women had free access to the site for eligibility assessment.

<sup>b</sup>: Breast cancer risk based on the Breast Cancer Genetics Referral Screening Tool (B-RST).

**Table 2:** Description of studies' participants

| Study            | Group        | Participants | Age Mean (SD)           | Previous mammography | University degree        |
|------------------|--------------|--------------|-------------------------|----------------------|--------------------------|
| Mathieu 2010     | Intervention | 172          | 41.9 (2.0) <sup>a</sup> | 53 (30.8%)           | 76 (44.2%) <sup>b</sup>  |
|                  | Control      | 212          | 41.8 (2.2) <sup>a</sup> | 52 (24.5%)           | 126 (59.4%) <sup>b</sup> |
| Eden 2015        | Before-After | 75           | 45.0 (2.5)              | 51 (68.0%)           | 34 (45.3%)               |
| Gummersbach 2015 | Intervention | 178          | 48.67 (0.79)            | <sup>c</sup>         | 33 (18.5%)               |
|                  | Control      | 175          | 48.76 (0.80)            | <sup>c</sup>         | 23 (13.2%)               |
| Hersch 2015      | Intervention | 419          | 49.67 (0.44)            | <sup>d</sup>         | 119 (28.4%)              |
|                  | Control      | 419          | 49.70 (0.44)            | <sup>d</sup>         | 123 (29.4%)              |

SD: Standard deviation.

<sup>a</sup> Out of the assessed participants, 116 and 198 in intervention and control group, respectively.

<sup>b</sup> Out of the assessed participants, 114 and 199 in intervention and control group, respectively.

<sup>c</sup> 3 and 4 women with BC in intervention and control group, respectively. Participants were not asked about mammographic exams in the past.

<sup>d</sup> No women with previous mammogram in the previous two years but it is not stated how many women had mammograms more than two years before being included in the study.

### Risk of bias in included studies

The evaluation of the risk of bias for each of the studies included the assessment of biases in selection, performance, detection, attrition, reporting, sampling or any other source of bias. Details on the authors' judgement and rationale for risk of bias can be found in Tables A2.2-A2.5 (online supplementary appendix 2). The majority of assessed criteria were judged as low risk. Hersch 2015<sup>8</sup> was the only study free of high risk of bias in all the domains assessed. Eden 2015<sup>20</sup> was rated as high risk of sampling bias due to the inclusion of women with high school education or higher, whereas Gummersbach 2015<sup>17</sup> was rated as high risk of attrition bias due to a high level of non-response. Mathieu 2010<sup>19</sup> was rated as unclear risk of allocation concealment and also of selective reporting.

## Main outcomes

Tables 3 and 4 present the risk differences for the dichotomous outcomes and the mean differences for the continuous outcomes, respectively. Figures 2 and 3 show the results of the meta-analyses for the dichotomous and continuous outcomes, respectively.

### Informed choice

The DA increased the proportion of women taking an informed decision, 58.0% vs. 36.5% according to Mathieu ( $p < 0.001$ ) and 24.2% vs. 15.4% according to Hersch ( $p = 0.002$ ). The meta-analysis estimation of risk difference was 14%, with a 95% CI of [2% , 27%] (Table 3 and Figure 2).

### Decisional conflict or confidence

Eden observed a significant post-intervention decrease in decisional conflict and a significant increase in decisional confidence (Table 4, Figure 3). In contrast, Hersch noted no significant effect of the intervention on decisional conflict and a significant decrease in decisional confidence, observed also by Gummersbach. These contradictory results introduced high heterogeneity that increased the uncertainty about the overall impact of a DA on decisional conflict or confidence (Figure 3).

### Knowledge

The use of a DA increased knowledge according to all studies, although the positive difference was not statistically significant in the Gummersbach study (Tables 3 and 4). The overall results provided by the meta-analyses were statistically significant, either in the proportion of women with adequate knowledge, with a significant increase of 12%, 95% CI=[7%, 16%], or in the mean score (difference of 0.70 out of 10 points, 95% CI =[0.27, 1.13]) (Figures 2 and 3).

**Table 3:** Outcomes assessment: Risk differences in informed choice, knowledge, positive attitudes/values towards screening, undecided and screening intention.

| Outcome                         | Study                     | Group        | Assessed | n(%)                    | Difference, <i>p-value</i> <sup>a</sup> |
|---------------------------------|---------------------------|--------------|----------|-------------------------|-----------------------------------------|
| Informed choice <sup>b</sup>    | Mathieu 2010 <sup>c</sup> | Intervention | 112      | 65 (58.0%)              | 21.5%, <i>p</i> < 0.001                 |
|                                 |                           | Control      | 192      | 70 (36.5%)              |                                         |
|                                 | Hersch 2015 <sup>d</sup>  | Intervention | 409      | 99 (24.2%)              | 8.8%, $\square = 0.0017$                |
|                                 |                           | Control      | 408      | 63 (15.4%)              |                                         |
| Knowledge                       | Mathieu 2010 <sup>e</sup> | Intervention | 113      | 106 (93.8%)             | 10.7%, $\square = 0.01$                 |
|                                 |                           | Control      | 189      | 157 (83.1%)             |                                         |
|                                 | Hersch 2015 <sup>f</sup>  | Intervention | 419      | 122 (29.1%)             | 13.0%, $\square < 0.001$                |
|                                 |                           | Control      | 419      | 71 (16.9%)              |                                         |
| Positive attitudes <sup>g</sup> | Mathieu 2010              | Intervention | 111      | 88 (79.3%)              | 0.2%, $\square = 0.89$                  |
|                                 |                           | Control      | 182      | 144 (79.1%)             |                                         |
|                                 | Hersch 2015               | Intervention | 409      | 282 (68.9%)             | -14.4%, $\square < 0.001$               |
|                                 |                           | Control      | 408      | 340 (83.3%)             |                                         |
| Undecided                       | Mathieu 2010              | Intervention | 117      | 21 (17.9%)              | -21.3%, $\square < 0.001$               |
|                                 |                           | Control      | 209      | 82 (39.2%)              |                                         |
|                                 | Eden 2015                 | Before       | 75       | 55.0 (41.71)            | -40 <sup>h</sup> , $\square < 0.001$    |
|                                 |                           | After        | 75       | 15.0 (31.57)            |                                         |
|                                 | Hersch 2015               | Intervention | 419      | 69 (16.5%)              | 9.3%, $\square < 0.001$                 |
|                                 |                           | Control      | 419      | 30 (7.2%)               |                                         |
| Screening intention             | Mathieu 2010              | Intervention | 117      | 50 (42.7%)              | 3.0% <sup>a</sup> , <i>p</i> =0.64      |
|                                 |                           | Control      | 209      | 83 (39.7%)              |                                         |
|                                 | Eden 2015                 | Before       | 75       | 54 (72.0%)              | 6.7% <sup>h</sup> , $\square = 0.123$   |
|                                 |                           | After        | 75       | 59 (78.7%) <sup>h</sup> |                                         |
|                                 | Gummersbach 2015          | Intervention | 178      | 145 (81.5%)             | -7.1%, $\square = 0.06$                 |
|                                 |                           | Control      | 175      | 155 (88.6%)             |                                         |
|                                 | Hersch 2015               | Intervention | 419      | 308 (73.5%)             | -13.1%, $\square < 0.001$               |
|                                 |                           | Control      | 419      | 363 (86.6%)             |                                         |

<sup>a</sup> Fisher's exact test.

<sup>b</sup> Eden provided only a post-intervention mean of the preparation for decision making scale of 73.2 (18.1).

<sup>c</sup> Out of the women assessed, including undecided women in the denominator.

<sup>d</sup> Informed choice defined as adequate knowledge and intentions consistent with attitudes.

<sup>e</sup> Knowledge (according to Mathieu): score higher than 5 out of 10.

<sup>f</sup> Knowledge (according to Hersch): Adequate knowledge when scoring at least 50% of the total available marks, including at least 1 numerical mark, on all three screening outcome subscales (breast cancer mortality benefit, false-positive screening result and overdiagnosis).

<sup>g</sup> Positive attitudes/values >50 out of 100 according to Mathieu and >=24 out of 30 according to Hersch.

<sup>h</sup> Difference as post minus pre-intervention values.

**Table 4:** Outcomes assessment: Mean difference in knowledge and in decisional conflict or confidence.

| Outcome                       | Study                         | Group                  | N      | mean (SD)                 | Difference p-value           |                             |
|-------------------------------|-------------------------------|------------------------|--------|---------------------------|------------------------------|-----------------------------|
| Knowledge                     | Mathieu 2010 <sup>a</sup>     | Intervention           | 113    | 7.35(1.84)                | 1.1, $\square < 0.001$       |                             |
|                               |                               | Control                | 189    | 6.27(1.85)                |                              |                             |
|                               | Gummersbach 2015 <sup>a</sup> | Intervention           | 161    | 5.49 (1.99)               | 0.26, $\square = 0.26$       |                             |
|                               |                               | Control                | 168    | 5.23 (2.06)               |                              |                             |
|                               | Hersch 2015 <sup>b</sup>      | Intervention           | 419    | 13.49 <sup>c</sup> (4.36) | 1.65, $\square < 0.001$      |                             |
|                               |                               | Control                | 419    | 11.84 <sup>c</sup> (3.74) |                              |                             |
| Decisional conflict           | Eden 2015 <sup>c</sup>        | Before                 | 75     | 46.33<br>(27.04)          | -38.0, $\square < 0.001$     |                             |
|                               |                               | After                  | 75     | 8.33 (15.58)              |                              |                             |
|                               | Hersch 2015                   | Intervention           | 419    | 12.55<br>(17.60)          | 0.35, $\square = 0.78$       |                             |
|                               |                               | Control                | 419    | 12.20<br>(18.90)          |                              |                             |
|                               | Decisional confidence         | Eden 2015 <sup>d</sup> | Before | 75                        | 79.67<br>(18.62)             | 16.16,<br>$\square < 0.001$ |
|                               |                               |                        | After  | 75                        | 95.73 (6.86)                 |                             |
| Gummersbach 2015 <sup>e</sup> |                               | Intervention           | 178    | 5.15 (1.36)               | -0.37, $\square = 0.017$     |                             |
|                               |                               | Control                | 182    | 5.52 (0.93)               |                              |                             |
| Hersch 2015 <sup>f</sup>      |                               | Intervention           | 419    | 4.35 (0.74)               | -0.18,<br>$\square = 0.0003$ |                             |
|                               |                               | Control                | 419    | 4.53 (0.67)               |                              |                             |

<sup>a</sup> Knowledge scored out of 10.

<sup>b</sup> Knowledge scored out of 22.

<sup>c</sup> Change in total decision conflict as post-intervention minus pre-intervention values, out of 100.

<sup>d</sup> Change in self-efficacy scale as post-intervention minus pre-intervention values, out of 100.

<sup>e</sup> Change in confidence scale in comparison with the control group, out of 6.

<sup>f</sup> Change in confidence scale in comparison with the control group, out of 5 (mean of 3 subscales).

## Secondary outcomes

The high heterogeneity of the results did not allow concluding significant post-intervention changes or differences on secondary outcomes such as positive attitudes



1  
2  
3 and values towards screening, decision about screening, and screening intention  
4  
5 (Table 3, Figure 2).  
6  
7

### 8 Positive attitudes/values towards screening 9

10 Mathieu did not showed any significant difference, but Hersch obtained a significant  
11 lower frequency of women with positive attitudes towards screening in women  
12 receiving the DA with overdiagnosis information.  
13  
14  
15  
16

### 17 Undecided about BC screening 18

19  
20 Mathieu reported a significant decrease in the amount of undecided about BC  
21 screening after DA administration. In contrast, Hersch obtained a significant increase  
22 for the intervention group, with the DA including thorough overdiagnosis information.  
23  
24  
25

### 26 Choice of BC screening 27

28  
29 Only Hersch noted a decrease in the intention of screening, being the only one that  
30 reported the observed value instead of the intention reported by the other three  
31 studies.  
32  
33  
34  
35  
36  
37  
38

## 39 DISCUSSION 40

### 41 42 Summary of main results 43 44

45 This systematic review includes three randomized controlled studies and one before-  
46 after study assessing DA given to women facing the decision to be screened with  
47 mammography. There was variability in the type and amount of information included  
48 in the DA, and also in the information given to the control group. This variability may  
49 explain in part, the significant heterogeneity in all the outcomes evaluated. Despite  
50 this heterogeneity, the meta-analysis revealed that DA produce a statistically  
51 significant improvement in knowledge of screening outcomes as well as a significant  
52  
53  
54  
55  
56  
57  
58  
59  
60

1  
2  
3 increase of the frequency of women making an informed choice. However, no  
4 significant effects were observed for decision conflict, decision confidence and  
5 positive attitudes towards screening. Therefore, the overall conclusion from our  
6 review is that DA increase significantly the knowledge and therefore the proportion of  
7 women taking an informed choice, but do not significantly modify attitudes or  
8 intentions towards screening.  
9

10  
11 Similarly, no significant effects were observed for the secondary outcomes that  
12 measured the frequency of participants remaining undecided or choosing to be  
13 screened. More specifically, Eden detected a significant decrease in intra-individual  
14 post-intervention decision conflict which was not observed by Hersch, when  
15 comparing women receiving a DA with overdiagnosis information vs. those without it.  
16 Indeed, Eden also obtained a significant improvement in intra-individual post-  
17 intervention decision confidence, while Gummersbach and Hersch obtained a  
18 significant decrease in decision confidence when comparing women receiving a DA  
19 with exhaustive information on screening side effects vs. those without it. Positive  
20 attitudes towards screening significantly decreased when overdiagnosis information  
21 was added to the DA, as observed by Hersch, in contrast with the absence of change  
22 observed by Mathieu. The frequency of women remaining undecided after DA showed  
23 completely opposite results. While Mathieu observed a very significant decrease,  
24 Hersch obtained a significant increase. The frequency of women decided to be  
25 screened showed a significant difference only in the Hersch study, where a decrease  
26 was observed for the group provided with overdiagnosis information, while  
27 Gummersbach, the other study incorporating thorough information on  
28 mammography side effects, showed a decrease nearly significant.  
29  
30  
31  
32  
33  
34  
35  
36  
37  
38  
39  
40  
41  
42  
43  
44  
45  
46  
47

### 48 **Quality of the evidence**

49  
50 Risk of bias ratings show that the included studies had low risk of bias in most of the  
51 assessed domains. There may have been publication bias due to failure to report  
52 negative findings. Several of the outcomes showed a high level of heterogeneity that  
53 limits the interpretation of the pooled effect size.  
54  
55  
56  
57  
58  
59  
60

## Strengths and limitations

Studies differed in design, especially in terms of the control group. In the Mathieu study<sup>19</sup>, the control group did not receive the DA until the outcome measures had been completed. In the Eden study<sup>20</sup>, the post-intervention intra-individual changes after the DA were assessed. In the Gummersbach study<sup>21</sup>, a more informative leaflet was compared to a less informative one. Finally, in the Hersch study<sup>8</sup>, the intervention DA had evidence-based explanatory and quantitative information on overdiagnosis, breast cancer mortality reduction, and false positives, whereas the control DA included information on breast cancer mortality reduction and false positives. Previous knowledge was not measured in the randomized controlled studies, although one expects that both groups have similar knowledge about mammography screening at baseline. In the Eden study, which assessed the intra-individual change, DA were particularly useful for the least informed and least confident women. On the other hand, Gummersbach<sup>21</sup> noted that education level was positively associated with acquired knowledge and that the less educated women had less decisional relevant knowledge after reading the leaflet, but they were more willing to undergo mammography than more educated women. Only the Hersch study included a follow-up for final screening participation.

The limitations of the study are related mainly with the generalization of the results. Women included in the studies probably had a higher education level, greater health awareness, and were more actively involved in health care decisions, than women in the general population. Besides, the DA were designed using specific data from Australia (Mathieu and Hersch), United States (Eden) and Germany (Gummersbach), providing results which could be not generalizable to other countries. All studies evaluated brochures only from the women's perspective, and in the context of research, where participants may have a higher level of commitment than women invited to participate in a breast screening program.

## Unanswered questions and future research

Women should use DA to be informed and support their decisions on breast cancer screening given their preferences and attitudes. It is important to ensure that the information provided is well understood by all women, including those with low educational level.

Internet is an inexpensive tool for the dissemination of DA or to search for additional information, if necessary, in order to present to the women all the options available and the harms and benefits of them. But there are women that are not familiarised or do not have access to Internet and therefore other ways to disseminate information are also necessary.

According to Gummersbach the doctor's advice was the most important factor to help in the decision of being screened for almost half of the women. This result indicates the importance of shared decision-making, where DA are essential tools. Shared decision-making also can help to reduce decisional conflict and improve confidence when information on screening harms is provided.

As highlighted by Hersch et al., establishing what constitutes an informed choice and what knowledge is needed to be informed, is an important issue and currently, no consensus exists on what knowledge constitutes being objectively informed for an informed or shared decision. When Hersch et al. used an expert-led approach based on medical guidelines and underpinned by decision theory, that required numerical and conceptual knowledge, only 24% in the intervention group and 15% in the control group were assessed as informed. When only conceptual knowledge was required these proportions increased to 50% and 19%, respectively. Difficulties understanding quantitative information or the widespread positive value on cancer screening can cause certain resistance to information on possible harms. Their study was the only one obtaining a significant increase in the amount of women remaining undecided about being screened in the group receiving information on overdiagnosis.

1  
2  
3 The DA of the included studies lacked detailed information on the outcomes of  
4 screening, detection, treatment, or financial strain and opportunity costs from the  
5 perspective of the society, what could be considered important to be included in  
6 future DA.  
7  
8  
9

## 10 11 **Conclusions**

12  
13  
14 DA in screening for breast cancer improve knowledge and promote informed decision  
15 making, in accordance with their preferences, for women who face the decision of  
16 screening, although this benefit is not free of decisional conflict and loss of confidence.  
17 Under the current paradigm change that values informed choice rather than  
18 maximising uptake, more research is necessary for the improvement of DA.  
19  
20  
21  
22  
23  
24  
25  
26

## 27 **Figure legends**

28  
29  
30 Figure 1: Study flow diagram

31  
32  
33 Figure 2: Meta-analysis of risk differences (REML method)

34  
35  
36 Figure 3: Meta-analysis of mean differences in scores (REML method)  
37  
38  
39  
40  
41

## 42 **The InforMa Group**

43  
44 The members of the InforMa Study Group are (alphabetical order): *ÀreaQ, Evaluation*  
45 *and Qualitative Research, Barcelona*: Àngels Cardona, Núria Codern. *Canary Islands*  
46 *Health Service (SESCS)*: Lilisbeth Perestelo, Ana Toledo. *Universitat Autònoma de*  
47 *Barcelona (UAB)*: Maria Feijoo. *Cancer Prevention and Control Program, Catalan*  
48 *Institute of Oncology, L'Hospitalet de Llobregat, Barcelona*: Montse García, Carmen  
49 Vidal. *IRBLLEIDA-Universitat de Lleida*: Sara Buil, Clara Vinyals, Laia Vinyals,  
50 Montserrat Martínez-Alonso, Marta Ortega, Sandra Pla, Anna Pons-Rodríguez,  
51 Montserrat Rué, Jorge Soler. *URV (University Rovira i Virgili), Reus*: Misericòrdia Carles,  
52  
53  
54  
55  
56  
57  
58  
59  
60

1  
2  
3 Maria José Pérez, Roger Pla. *IMIM, Hospital del Mar Medical Research Institute,*  
4 *Barcelona:* Andrea Burón, Xavier Castells, Anabel Romero, Maria Sala.  
5  
6  
7  
8

### 9 **Competing interests**

10  
11 All authors have completed the ICMJE uniform disclosure form at  
12 [www.icmje.org/coi\\_disclosure.pdf](http://www.icmje.org/coi_disclosure.pdf) and declare: funding from the Spanish Ministry of  
13 Health and the Biomedical Research Institute of Lleida (IRBLLEIDA) as described  
14 below; no financial relationships with any organisations that might have an interest in  
15 the submitted work in the previous three years; no other relationships or activities  
16 that could appear to have influenced the submitted work.  
17  
18  
19  
20  
21  
22  
23  
24

### 25 **Informed consent**

26  
27 Since the work does not involve direct research in human subjects, informed consent  
28 was not obtained. Nevertheless, the study was approved by the Ethics Committee of  
29 the Hospital Universitari Arnau de Vilanova in the city of Lleida (Spain).  
30  
31  
32  
33  
34

### 35 **Contributors and authorship**

36  
37 MMA, MC and MR designed the study. All authors contributed towards the execution  
38 of the study. MMA provided methodological expertise in systematic reviews and  
39 searching strategies. The selection and risk of bias assessment of each study was  
40 independently conducted in pairs by four reviewers (MC, MJP, MMA, and MR). AP  
41 contributed to extracting the information of the identified studies and assessing the  
42 inclusion criteria. MMA and MR wrote the first draft with guidance and contributions  
43 from MC, MJP, and MG. All authors read, provided critical feedback and approved the  
44 final manuscript.  
45  
46  
47  
48  
49  
50  
51  
52  
53  
54  
55  
56  
57  
58  
59  
60

## Acknowledgements

We thank Drs. Karen Eden and Jolyn Hersch for facilitating non-published data that enabled us to obtain summary measures of some outcomes in the performed meta-analyses, and Krystal A. Klein, PhD for her support in the Eden study data. We are indebted to Ivan Solà, from the Iberoamerican Cochrane Centre, for performing the search in the EMBASE, PsycINFO and CINAHL databases. We also thank Maria Feijoo-Cid, PhD for her insightful comments to previous versions of the manuscript, and JP Glutting for review and editing.

## Funding

This study was supported by the research grant “Women participation in decisions and strategies on early detection of breast cancer” (PI14/00113) from the Instituto de Salud Carlos III and cofunded by Fondo Europeo de Desarrollo Regional (FEDER) “Una manera de hacer Europa”. Anna Pons received a grant for PhD students from the Lleida Biomedical Research Institute (IRBLLEIDA).

## References

1. Rutqvist LE, Miller A, Andersson I, et al. Reduced breast-cancer mortality with mammography screening—an assessment of currently available data. *Int J Cancer* 1990;55:76-84.
2. Gotzsche PC, Olsen O. Is screening for breast cancer with mammography justifiable? *Lancet* 2000;355:129-134.
3. Berry DA, Cronin KA, Plevritis SK, et al. Effect of screening and adjuvant therapy on mortality from breast cancer. *N Engl J Med* 2005;353:1784-1792.
4. Marmot MG, Altman DG, Cameron DA, Dewar JA, Thompson SG, Wilcox M. The benefits and harms of breast cancer screening: an independent review. *Br J Cancer* 2013;108:2205-2240.
5. Gotzsche PC, Jorgensen KJ. Screening for breast cancer with mammography. *Cochrane Database Syst Rev* 2013;6:CD001877.
6. Stefanek ME. Uninformed compliance or informed choice? A needed shift in our approach to cancer screening *J Natl Cancer Inst.* 2011;103:1821-1826.
7. Strech D. Participation rate or informed choice? Rethinking the European key performance indicators for mammography screening. *Health Policy* 2014;115:100-103.
8. Hersch J, Barratt A, Jansen J, et al. Use of a decision aid including information on overdiagnosis to support informed choice about breast cancer screening: a randomised controlled trial. *Lancet* 2015;385:1642-1652.
9. Moynihan R, Nickel B, Hersch J, et al. Public opinions about overdiagnosis : A national community survey. *PLoS One* 2015;10(e0125165):1-13.  
doi:[10.1371/journal.pone.0125165](https://doi.org/10.1371/journal.pone.0125165).



- 1  
2  
3 10. Vilapriño E, Forné C, Carles M, et al. Cost-effectiveness and harm-benefit analyses  
4 of risk-based screening strategies for breast cancer. *PLoS One* 2014;9:e86858. doi:  
5 [10.1371/journal.pone.0086858](https://doi.org/10.1371/journal.pone.0086858).  
6  
7  
8  
9  
10 11. Schousboe JT, Kerlikowske K, Loh A, Cummings SR. Personalizing mammography  
11 by breast density and other risk factors for breast cancer: analysis of health benefits  
12 and cost-effectiveness. *Ann Intern Med* 2011;155:10-20.  
13  
14  
15  
16 12. Ayer T, Alagoz O, Stout NK. OR Forum—A POMDP approach to personalize  
17 mammography screening decisions. *Operations Research* 2012;60:1019-1034.  
18  
19  
20 13. Evans DG, Astley S, Stavrinou P, et al. *Improvement in risk prediction, early*  
21 *detection and prevention of breast cancer in the NHS Breast Screening Programme and*  
22 *Family History Clinic: A dual cohort study*. Southampton (UK): NIHR Journals Library:  
23 Programme Grants for Applied Research, No. 4.11; 2016.  
24  
25  
26  
27  
28 14. Wu YY, Yen MF, Yu CP, Chen HH. Individually tailored screening of breast cancer  
29 with genes, tumour phenotypes, clinical attributes, and conventional risk factors. *Br J*  
30 *Cancer* 2013;108:2241-2249.  
31  
32  
33  
34  
35 15. Stacey D, Légaré F, Nf C, et al. Decision aids for people facing health treatment or  
36 screening decisions. *Cochrane Database Syst Rev* 2014;1:CD001431.  
37  
38 doi:[10.1002/14651858.CD001431.pub4](https://doi.org/10.1002/14651858.CD001431.pub4).  
39  
40  
41 16. Dreier M, Borutta B, Seidel G, Mu I, Dierks M-I, Walter U. Communicating the  
42 benefits and harms of colorectal cancer screening needed for an informed choice : A  
43 systematic evaluation of leaflets and booklets. *PLoS One* 2014;9.  
44  
45 doi:[10.1371/journal.pone.0107575](https://doi.org/10.1371/journal.pone.0107575).  
46  
47  
48  
49 17. Gummersbach E, Schmitten J in der, Mortsiefer A, Abholz H-H, Wegscheider K,  
50 Pentzek M. Willingness to participate in mammography screening: a randomized  
51 controlled questionnaire study of responses to two patient information leaflets with  
52 different factual content. *Deutsches Ärzteblatt international* 2015;112:61-68.  
53  
54  
55  
56  
57  
58  
59  
60

1  
2  
3 18. Moher D, Liberati A, Tetzlaff J, Altman DG, the PRISMA Group. Preferred reporting  
4 items for systematic reviews and meta-analyses: the PRISMA statement. *Int J Surg*  
5 2010;8:336-341.  
6  
7

8  
9 19. Mathieu E, Barratt A, McGeechan K, Davey H, Howard K, Houssami N. Helping  
10 women make choices about mammography screening: an online randomized trial of a  
11 decision aid for 40-year-old women. *Patient Educ Couns* 2010;81:63-72.  
12  
13

14  
15 20. Eden KB, Scariati P, Klein K, et al. Mammography decision aid reduces decisional  
16 conflict for women in their forties considering screening. *J Womens Health*  
17 2015;24:1013-1020.  
18  
19

20  
21 21. Gummersbach E, in der Schmitt J, Abholz H-H, Wegscheider K, Pentzek M.  
22 Effects of different information brochures on women's decision-making regarding  
23 mammography screening: study protocol for a randomized controlled questionnaire  
24 study. *Trials* 2013:319 doi: [10.1186/1745-6215-14-319](https://doi.org/10.1186/1745-6215-14-319).  
25  
26  
27  
28  
29  
30  
31  
32  
33  
34  
35  
36  
37  
38  
39  
40  
41  
42  
43  
44  
45  
46  
47  
48  
49  
50  
51  
52  
53  
54  
55  
56  
57  
58  
59  
60

1  
2  
3  
4  
5  
6  
7  
8  
9  
10  
11  
12  
13  
14  
15  
16  
17  
18  
19  
20  
21  
22  
23  
24  
25  
26  
27  
28  
29  
30  
31  
32  
33  
34  
35  
36  
37  
38  
39  
40  
41  
42  
43  
44  
45  
46  
47  
48  
49  
50  
51  
52  
53  
54  
55  
56  
57  
58  
59  
60

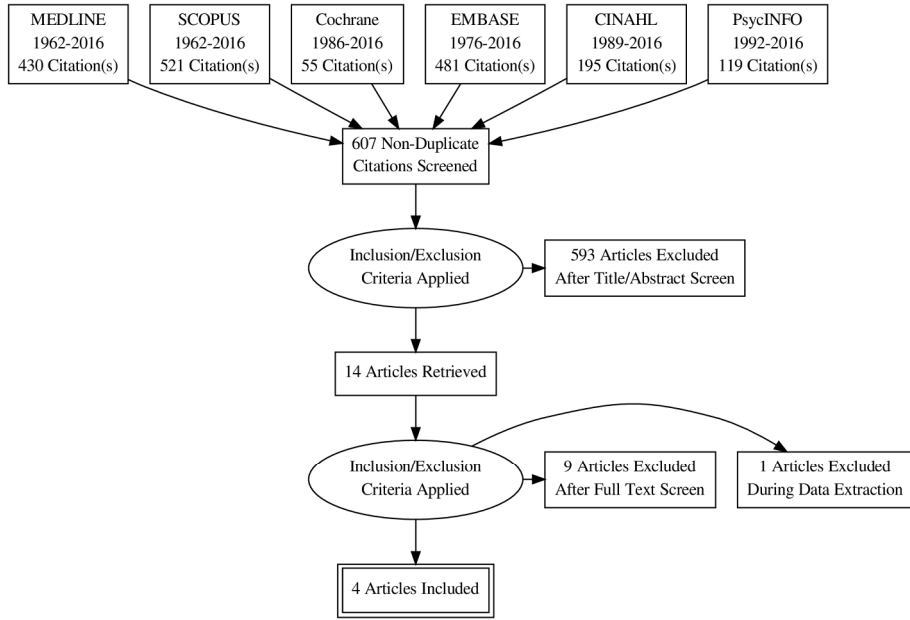

Figure 1: Study flow diagram

289x205mm (200 x 200 DPI)

1  
2  
3  
4  
5  
6  
7  
8  
9  
10  
11  
12  
13  
14  
15  
16  
17  
18  
19  
20  
21  
22  
23  
24  
25  
26  
27  
28  
29  
30  
31  
32  
33  
34  
35  
36  
37  
38  
39  
40  
41  
42  
43  
44  
45  
46  
47  
48  
49  
50  
51  
52  
53  
54  
55  
56  
57  
58  
59  
60

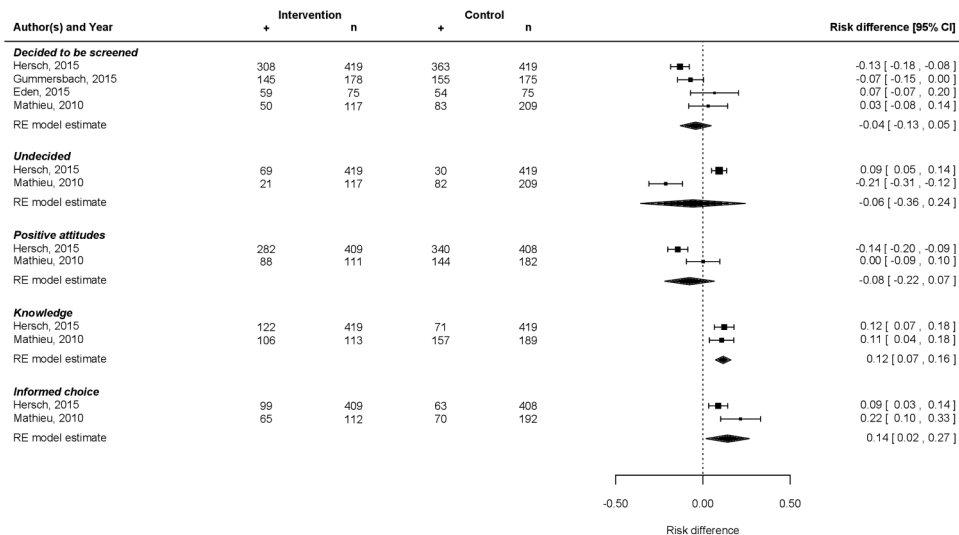

Figure 2: Meta-analysis of risk differences (REML method)

286x179mm (200 x 200 DPI)

Review only

1  
2  
3  
4  
5  
6  
7  
8  
9  
10  
11  
12  
13  
14  
15  
16  
17  
18  
19  
20  
21  
22  
23  
24  
25  
26  
27  
28  
29  
30  
31  
32  
33  
34  
35  
36  
37  
38  
39  
40  
41  
42  
43  
44  
45  
46  
47  
48  
49  
50  
51  
52  
53  
54  
55  
56  
57  
58  
59  
60

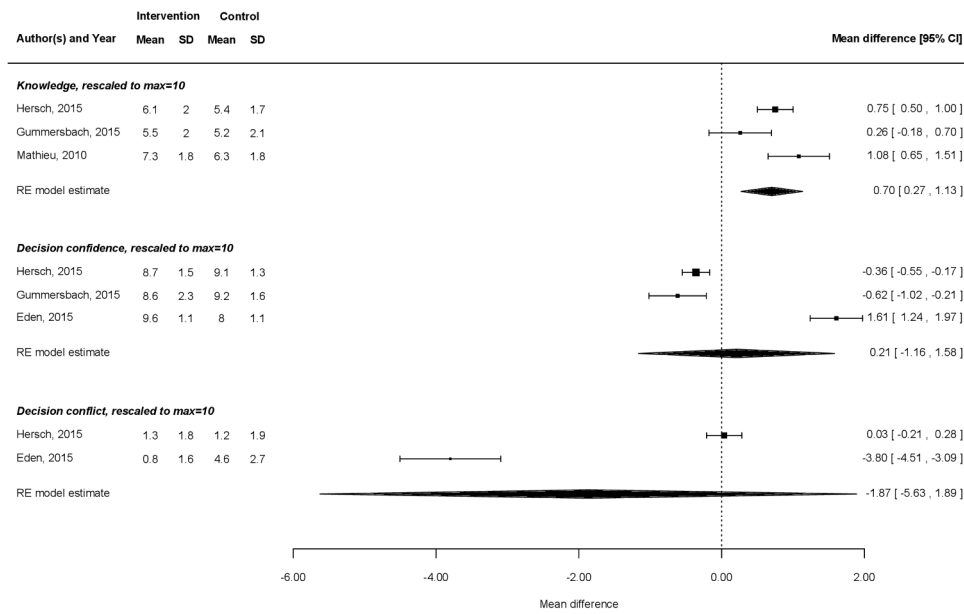

Figure 3: Meta-analysis of mean differences in scores (REML method)

286x179mm (200 x 200 DPI)

## APPENDIX 1

### Search criteria for Decision Aids on breast cancer screening

1. In MEDLINE:  
 “breast cancer”[tiab] (decision[tiab] OR choice[tiab]) AND (aid[tiab] OR informed[tiab]) AND (mammography[tiab] OR mammogram[tiab]) NOT protocol[ti]
2. Adapting it to SCOPUS:  
 (TITLE-ABS-KEY (“breast cancer”) AND ( TITLE-ABS-KEY (decision) OR TITLE-ABS-KEY (choice) ) AND( TITLE-ABS-KEY (aid) OR TITLE-ABS-KEY (informed) ) AND ( TITLE-ABS-KEY (mammography) OR TITLE-ABS-KEY (mammogram) ) AND NOT TITLE (protocol )
3. And, equivalently for EMBASE, CINAHL, PsycInfo, and the Cochrane Library Plus.

## APPENDIX 2

**Table A2. 1:** Excluded studies after full text assessment

| Study           | Reason of exclusion                                                                                                                |
|-----------------|------------------------------------------------------------------------------------------------------------------------------------|
| Lawrence 2000   | No adequate evaluation of the decision aid (DA), only acceptability is assessed.                                                   |
| Webster 2007    | No adequate evaluation of the DA, no DA but a leaflet is assessed.                                                                 |
| Bodurtha 2009   | No adequate evaluation of the DA, no decision is assessed.                                                                         |
| Pasternack 2011 | No adequate evaluation of the DA, only acceptability is assessed.                                                                  |
| Waller 2013     | No adequate evaluation of the DA, only the design is described, no assessment is reported.                                         |
| Hersch 2014     | Pilot study of a main study already included.                                                                                      |
| Waller 2014     | No adequate evaluation of the DA, three formats of reporting information are compared.                                             |
| Berens 2015     | No adequate evaluation of the DA, no DA but a leaflet is assessed.                                                                 |
| Petrova 2015    | The DA is not assessed in a real context.                                                                                          |
| Bourmaud 2016   | No adequate evaluation of the DA. Informed choice is assessed only by participation rate. The overdiagnosis harm is not mentioned. |

## Characteristics of the included studies

**Table A2.2.** Study Characteristics

| <b>Mathieu 2010</b>                                       |                                                                                                                                                                                                                         |                                                                                                                                                                                                                                                      |
|-----------------------------------------------------------|-------------------------------------------------------------------------------------------------------------------------------------------------------------------------------------------------------------------------|------------------------------------------------------------------------------------------------------------------------------------------------------------------------------------------------------------------------------------------------------|
| <i>Methods</i>                                            | Randomised to decision aid (DA) vs usual care (UC).                                                                                                                                                                     |                                                                                                                                                                                                                                                      |
| <i>Participants</i>                                       | 189 + 223 women, aged 38-45 years, considering mammography screening.                                                                                                                                                   |                                                                                                                                                                                                                                                      |
| <i>Interventions</i>                                      | DA: explained the benefits and harms, included a values clarification exercise and a worksheet to support decision making.<br>UC: delayed intervention                                                                  |                                                                                                                                                                                                                                                      |
| <i>Outcomes</i>                                           | Primary outcome: knowledge of benefits and harms of screening. Secondary outcomes: informed choice (composite of knowledge, values and intention), anxiety, acceptability of the DA, and intention regarding screening. |                                                                                                                                                                                                                                                      |
| <b>Risk of bias</b>                                       |                                                                                                                                                                                                                         |                                                                                                                                                                                                                                                      |
| <i>Bias</i>                                               | <i>Authors' judgement</i>                                                                                                                                                                                               | <i>Support for judgement</i>                                                                                                                                                                                                                         |
| Random sequence generation (Selection bias)               | Low risk                                                                                                                                                                                                                | Pg. 66 (randomization and baseline questions section): "computer generated simple randomization schedule".                                                                                                                                           |
| Allocation concealment (Selection bias)                   | Unclear risk                                                                                                                                                                                                            | Pg. 66 "randomization was conducted in a concealed manner." The method of allocation concealment was not stated.                                                                                                                                     |
| Blinding of participants and personnel (Performance bias) | Unclear risk                                                                                                                                                                                                            | Not reported                                                                                                                                                                                                                                         |
| Blinding of outcome assessment (Detection bias)           | Low risk                                                                                                                                                                                                                | Unclear blinding but outcomes were not subjective to interpretation.                                                                                                                                                                                 |
| Incomplete outcomes' data. All outcomes (Attrition bias)  | Low risk                                                                                                                                                                                                                | Table 2: all outcomes mentioned in the paper were reported in the Results section. Table 3: outcomes of anxiety and acceptability can be found. Page 69 explains missing data. Figures 1 and 2 provide the reasons for the exclusions in each group. |
| Selective reporting (Reporting bias)                      | Unclear risk                                                                                                                                                                                                            | No mention of protocol.                                                                                                                                                                                                                              |
| Other bias (Sampling and other)                           | Low risk                                                                                                                                                                                                                | Pg. 65: "To proceed, women were required to click in a box on the computer screen to indicate they had read the study information and were eligible to participate." The trial was advertised on various websites and in a radio program.            |

**Table A2.3.** Study Characteristics

| <b>Eden 2015</b>                                          |                                                                                                                                                                               |                                                                                                                                                                                |
|-----------------------------------------------------------|-------------------------------------------------------------------------------------------------------------------------------------------------------------------------------|--------------------------------------------------------------------------------------------------------------------------------------------------------------------------------|
| <i>Methods</i>                                            | Observational study. Women were assessed before and after the decision aid (DA).                                                                                              |                                                                                                                                                                                |
| <i>Participants</i>                                       | 75 women aged 40-49 years.                                                                                                                                                    |                                                                                                                                                                                |
| <i>Interventions</i>                                      | The decision aid (Mammopad) included modules on breast cancer, mammography, risk assessment, and priority setting about screening.                                            |                                                                                                                                                                                |
| <i>Outcomes</i>                                           | Primary outcome: decisional conflict measured before and after using DA. Secondary outcomes: decision self-efficacy and intention to begin or continue mammography screening. |                                                                                                                                                                                |
| <b>Risk of bias</b>                                       |                                                                                                                                                                               |                                                                                                                                                                                |
| <i>Bias</i>                                               | <i>Authors' judgement</i>                                                                                                                                                     | <i>Support for judgement</i>                                                                                                                                                   |
| Random sequence generation (Selection bias)               | NA                                                                                                                                                                            |                                                                                                                                                                                |
| Allocation concealment (Selection bias)                   | NA                                                                                                                                                                            |                                                                                                                                                                                |
| Blinding of participants and personnel (Performance bias) | NA                                                                                                                                                                            |                                                                                                                                                                                |
| Blinding of outcome assessment (Detection bias)           | NA                                                                                                                                                                            |                                                                                                                                                                                |
| Incomplete outcomes' data. All outcomes (Attrition bias)  | Low risk                                                                                                                                                                      | Study enrolment flow diagram is included in the publication. Information on procedures and results for the outcomes is detailed on pg. 1015 and on the publication appendices. |
| Selective reporting (Reporting bias)                      | Low risk                                                                                                                                                                      | Results reported adhere to the protocol.                                                                                                                                       |
| Other bias (sampling bias)                                | High risk                                                                                                                                                                     | Pg. 1018 "We recruited fewer women with only high school education and also fewer Latinas".                                                                                    |



**Table A2.4.** Study Characteristics

| <b>Gummersbach 2015</b>                                   |                                                                                                                                                            |                                                                                                                                                                                   |
|-----------------------------------------------------------|------------------------------------------------------------------------------------------------------------------------------------------------------------|-----------------------------------------------------------------------------------------------------------------------------------------------------------------------------------|
| <i>Methods</i>                                            | Randomised to two decision aids (DA) with different information.                                                                                           |                                                                                                                                                                                   |
| <i>Participants</i>                                       | 353 women, aged 48-49 years, about to receive the first invitation to screening.                                                                           |                                                                                                                                                                                   |
| <i>Interventions</i>                                      | Intervention: DA with detailed information on screening harms.<br>Control: standard DA.                                                                    |                                                                                                                                                                                   |
| <i>Outcomes</i>                                           | Primary outcome: willingness to participate in screening.<br>Secondary outcomes: knowledge, decisional confidence, determinants of the screening decision. |                                                                                                                                                                                   |
| <b>Risk of bias</b>                                       |                                                                                                                                                            |                                                                                                                                                                                   |
| <i>Bias</i>                                               | <i>Authors' judgement</i>                                                                                                                                  | <i>Support for judgement</i>                                                                                                                                                      |
| Random sequence generation (Selection bias)               | Low risk                                                                                                                                                   | Pg. 62: "The 24 participants from each practice were selected by a computer-assisted random procedure."                                                                           |
| Allocation concealment (Selection bias)                   | Low risk                                                                                                                                                   | Pg. 62: the group allotment process was also random.                                                                                                                              |
| Blinding of participants and personnel (Performance bias) | Low risk                                                                                                                                                   | Pg. 62: "The participants and their family physicians were blinded with respect to group allotment, but the study team was not".                                                  |
| Blinding of outcome assessment (Detection bias)           | Low risk                                                                                                                                                   | Pg. 62: "The participants were asked by letter to fill out the questionnaire after reading the leaflet and to send it back in an envelope that was also enclosed in the mailing". |
| Incomplete outcomes' data. All outcomes (Attrition bias)  | High risk                                                                                                                                                  | 46.7% non-response.                                                                                                                                                               |
| Selective reporting (Reporting bias)                      | Low risk                                                                                                                                                   | The response rate was the same in both groups.                                                                                                                                    |
| Other bias (sampling bias)                                | Low risk                                                                                                                                                   | Participants recruited from family practices.                                                                                                                                     |

**Table A2.5.** Study Characteristics

| <b>Hersch 2015</b>                                        |                                                                                                                                                                                                                                                                                                |                                                                                                                                                                                                                                                                                                              |
|-----------------------------------------------------------|------------------------------------------------------------------------------------------------------------------------------------------------------------------------------------------------------------------------------------------------------------------------------------------------|--------------------------------------------------------------------------------------------------------------------------------------------------------------------------------------------------------------------------------------------------------------------------------------------------------------|
| <i>Methods</i>                                            | Randomised to two decision aids (DA) with different information.                                                                                                                                                                                                                               |                                                                                                                                                                                                                                                                                                              |
| <i>Participants</i>                                       | 879 women, aged 48-50 years, about to receive the first invitation to screening.                                                                                                                                                                                                               |                                                                                                                                                                                                                                                                                                              |
| <i>Interventions</i>                                      | Intervention: comprising evidence-based explanatory and quantitative information on overdetection, breast cancer mortality reduction, and false positives.<br>Control: decision aid including information on breast cancer mortality reduction and false positives.                            |                                                                                                                                                                                                                                                                                                              |
| <i>Outcomes</i>                                           | Primary outcome: informed choice defined as adequate knowledge and consistency between attitudes and screening intentions. Secondary outcomes: screening attitudes, decisional conflict, worry about breast cancer, intention about undergoing screening, and opinions about the decision aid. |                                                                                                                                                                                                                                                                                                              |
| <b>Risk of bias</b>                                       |                                                                                                                                                                                                                                                                                                |                                                                                                                                                                                                                                                                                                              |
| <i>Bias</i>                                               | <i>Authors' judgement</i>                                                                                                                                                                                                                                                                      | <i>Support for judgement</i>                                                                                                                                                                                                                                                                                 |
| Random sequence generation (Selection bias)               | Low risk                                                                                                                                                                                                                                                                                       | Pg. 1644: "A programmer who had no contact with participants generated the randomisation sequence using a computer system that was inaccessible until after recruitment... We assigned participants to either the intervention or control group in a 1:1 ratio with permuted block sizes of four and eight." |
| Allocation concealment (Selection bias)                   | Low risk                                                                                                                                                                                                                                                                                       | Pg. 1645: "Interviewers were unaware of the materials that women would receive (ensuring allocation concealment)."                                                                                                                                                                                           |
| Blinding of participants and personnel (Performance bias) | Low risk                                                                                                                                                                                                                                                                                       | Pg. 1645: "Double blinded. Women knew they would receive one of two versions of an information booklet but did not know how these differed or which one was the intervention. We designed the follow-up interview to ensure the group assignment was unclear to the interviewer until the final question."   |
| Blinding of outcome assessment (Detection bias)           | Low risk                                                                                                                                                                                                                                                                                       | Pg. 1645: "Researchers who analysed data were unaware of the random allocation."                                                                                                                                                                                                                             |
| Incomplete outcomes' data. All outcomes (Attrition bias)  | Low risk                                                                                                                                                                                                                                                                                       | Both groups have similar dropout rates.                                                                                                                                                                                                                                                                      |
| Selective reporting (Reporting bias)                      | Low risk                                                                                                                                                                                                                                                                                       | The response rate was the same in both groups.                                                                                                                                                                                                                                                               |
| Other bias                                                | Low risk                                                                                                                                                                                                                                                                                       | It seems free of other biases.                                                                                                                                                                                                                                                                               |

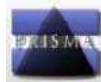

# PRISMA 2009 Checklist

| Section/topic                      | #  | Checklist item                                                                                                                                                                                                                                                                                              | Reported on page # |
|------------------------------------|----|-------------------------------------------------------------------------------------------------------------------------------------------------------------------------------------------------------------------------------------------------------------------------------------------------------------|--------------------|
| <b>TITLE</b>                       |    |                                                                                                                                                                                                                                                                                                             |                    |
| Title                              | 1  | Identify the report as a systematic review, meta-analysis, or both.                                                                                                                                                                                                                                         | 1                  |
| <b>ABSTRACT</b>                    |    |                                                                                                                                                                                                                                                                                                             |                    |
| Structured summary                 | 2  | Provide a structured summary including, as applicable: background; objectives; data sources; study eligibility criteria, participants, and interventions; study appraisal and synthesis methods; results; limitations; conclusions and implications of key findings; systematic review registration number. | 2                  |
| <b>INTRODUCTION</b>                |    |                                                                                                                                                                                                                                                                                                             |                    |
| Rationale                          | 3  | Describe the rationale for the review in the context of what is already known.                                                                                                                                                                                                                              | 4-5                |
| Objectives                         | 4  | Provide an explicit statement of questions being addressed with reference to participants, interventions, comparisons, outcomes, and study design (PICOS).                                                                                                                                                  | 5                  |
| <b>METHODS</b>                     |    |                                                                                                                                                                                                                                                                                                             |                    |
| Protocol and registration          | 5  | Indicate if a review protocol exists, if and where it can be accessed (e.g., Web address), and, if available, provide registration information including registration number.                                                                                                                               | -                  |
| Eligibility criteria               | 6  | Specify study characteristics (e.g., PICOS, length of follow-up) and report characteristics (e.g., years considered, language, publication status) used as criteria for eligibility, giving rationale.                                                                                                      | 6                  |
| Information sources                | 7  | Describe all information sources (e.g., databases with dates of coverage, contact with study authors to identify additional studies) in the search and date last searched.                                                                                                                                  | 7                  |
| Search                             | 8  | Present full electronic search strategy for at least one database, including any limits used, such that it could be repeated.                                                                                                                                                                               | 7                  |
| Study selection                    | 9  | State the process for selecting studies (i.e., screening, eligibility, included in systematic review, and, if applicable, included in the meta-analysis).                                                                                                                                                   | 7                  |
| Data collection process            | 10 | Describe method of data extraction from reports (e.g., piloted forms, independently, in duplicate) and any processes for obtaining and confirming data from investigators.                                                                                                                                  | 7                  |
| Data items                         | 11 | List and define all variables for which data were sought (e.g., PICOS, funding sources) and any assumptions and simplifications made.                                                                                                                                                                       | 7                  |
| Risk of bias in individual studies | 12 | Describe methods used for assessing risk of bias of individual studies (including specification of whether this was done at the study or outcome level), and how this information is to be used in any data synthesis.                                                                                      | 7-8                |
| Summary measures                   | 13 | State the principal summary measures (e.g., risk ratio, difference in means).                                                                                                                                                                                                                               | 8                  |
| Synthesis of results               | 14 | Describe the methods of handling data and combining results of studies, if done, including measures of consistency (e.g., $I^2$ for each meta-analysis).                                                                                                                                                    | 8                  |

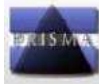

# PRISMA 2009 Checklist

Page 1 of 2

| Section/topic                 | #  | Checklist item                                                                                                                                                                                           | Reported on page # |
|-------------------------------|----|----------------------------------------------------------------------------------------------------------------------------------------------------------------------------------------------------------|--------------------|
| Risk of bias across studies   | 15 | Specify any assessment of risk of bias that may affect the cumulative evidence (e.g., publication bias, selective reporting within studies).                                                             | -                  |
| Additional analyses           | 16 | Describe methods of additional analyses (e.g., sensitivity or subgroup analyses, meta-regression), if done, indicating which were pre-specified.                                                         | -                  |
| <b>RESULTS</b>                |    |                                                                                                                                                                                                          |                    |
| Study selection               | 17 | Give numbers of studies screened, assessed for eligibility, and included in the review, with reasons for exclusions at each stage, ideally with a flow diagram.                                          | 8                  |
| Study characteristics         | 18 | For each study, present characteristics for which data were extracted (e.g., study size, PICOS, follow-up period) and provide the citations.                                                             | 9-11               |
| Risk of bias within studies   | 19 | Present data on risk of bias of each study and, if available, any outcome level assessment (see item 12).                                                                                                | 11                 |
| Results of individual studies | 20 | For all outcomes considered (benefits or harms), present, for each study: (a) simple summary data for each intervention group (b) effect estimates and confidence intervals, ideally with a forest plot. | 12-15              |
| Synthesis of results          | 21 | Present results of each meta-analysis done, including confidence intervals and measures of consistency.                                                                                                  | 12-15              |
| Risk of bias across studies   | 22 | Present results of any assessment of risk of bias across studies (see Item 15).                                                                                                                          | -                  |
| Additional analysis           | 23 | Give results of additional analyses, if done (e.g., sensitivity or subgroup analyses, meta-regression [see Item 16]).                                                                                    | -                  |
| <b>DISCUSSION</b>             |    |                                                                                                                                                                                                          |                    |
| Summary of evidence           | 24 | Summarize the main findings including the strength of evidence for each main outcome; consider their relevance to key groups (e.g., healthcare providers, users, and policy makers).                     | 15-16              |
| Limitations                   | 25 | Discuss limitations at study and outcome level (e.g., risk of bias), and at review-level (e.g., incomplete retrieval of identified research, reporting bias).                                            | 17-18              |
| Conclusions                   | 26 | Provide a general interpretation of the results in the context of other evidence, and implications for future research.                                                                                  | 18                 |
| <b>FUNDING</b>                |    |                                                                                                                                                                                                          |                    |
| Funding                       | 27 | Describe sources of funding for the systematic review and other support (e.g., supply of data); role of funders for the systematic review.                                                               | 21                 |

From: Moher D, Liberati A, Tetzlaff J, Altman DG, The PRISMA Group (2009). Preferred Reporting Items for Systematic Reviews and Meta-Analyses: The PRISMA Statement. PLoS Med 6(6): e1000097. doi:10.1371/journal.pmed1000097

For more information, visit: [www.prisma-statement.org](http://www.prisma-statement.org).

Page 2 of 2

For peer review only - <http://bmjopen.bmj.com/site/about/guidelines.xhtml>

# BMJ Open

## Assessment of the effects of decision aids about breast cancer screening: a systematic review and meta-analysis

|                                 |                                                                                                                                                                                                                                                                                                                                                                                                                                                                                                                                                                           |
|---------------------------------|---------------------------------------------------------------------------------------------------------------------------------------------------------------------------------------------------------------------------------------------------------------------------------------------------------------------------------------------------------------------------------------------------------------------------------------------------------------------------------------------------------------------------------------------------------------------------|
| Journal:                        | <i>BMJ Open</i>                                                                                                                                                                                                                                                                                                                                                                                                                                                                                                                                                           |
| Manuscript ID                   | bmjopen-2017-016894.R1                                                                                                                                                                                                                                                                                                                                                                                                                                                                                                                                                    |
| Article Type:                   | Research                                                                                                                                                                                                                                                                                                                                                                                                                                                                                                                                                                  |
| Date Submitted by the Author:   | 01-Jun-2017                                                                                                                                                                                                                                                                                                                                                                                                                                                                                                                                                               |
| Complete List of Authors:       | Martinez-Alonso, Montserrat; University of Lleida-IRBLLEIDA, Basic Medical Sciences<br>Carles-Lavila, Misericòrdia; University Rovira i Virgili, Economics; Research Centre on Industrial and Public Economics (CREIP)<br>Pérez-Lacasta, María José; University Rovira i Virgili, Economics<br>Pons-Rodriguez, Anna; Lleida Biomedical Research Institut (IRBLLEIDA)<br>Garcia, Montse; Catalan Institute of Oncology-IDIBELL<br>Rue, Montserrat; University of Lleida-IRBLLEIDA, Basic Medical Sciences; Health Services Research on Chronic Patients Network (REDISSEC) |
| <b>Primary Subject Heading</b>: | Communication                                                                                                                                                                                                                                                                                                                                                                                                                                                                                                                                                             |
| Secondary Subject Heading:      | Health services research, Health policy, Oncology, Public health                                                                                                                                                                                                                                                                                                                                                                                                                                                                                                          |
| Keywords:                       | breast cancer, decision aid, mammography, screening, shared decision making                                                                                                                                                                                                                                                                                                                                                                                                                                                                                               |
|                                 |                                                                                                                                                                                                                                                                                                                                                                                                                                                                                                                                                                           |

SCHOLARONE™  
Manuscripts

Only

1  
2  
3  
4  
5  
6 **Assessment of the effects of decision aids about breast cancer screening: a**  
7 **systematic review and meta-analysis**  
8  
9

10 Montserrat Martínez-Alonso<sup>1,5</sup>, Misericòrdia Carles-Lavila<sup>2,5,6</sup>, Maria José Pérez-  
11 Lacasta<sup>2,5</sup>, Anna Pons-Rodríguez<sup>3</sup>, Montse Garcia<sup>4</sup>, Montserrat Rué<sup>1,5,7</sup>, on behalf of  
12 the InforMa Group  
13  
14  
15  
16  
17  
18  
19

20 <sup>1</sup> Department of Basic Medical Sciences, University of Lleida-IRBLLEIDA, Avda. Rovira  
21 Roure 80, 25198 Lleida, Spain  
22

23 <sup>2</sup> Department of Economics, University Rovira i Virgili, Avda. Universitat 1, 43204  
24 Reus, Spain  
25  
26

27 <sup>3</sup> Lleida Biomedical Research Institut (IRBLLEIDA), Avda. Rovira Roure 80, 25198,  
28 Lleida, Spain  
29  
30

31 <sup>4</sup> Cancer Prevention and Control Program, Catalan Institute of Oncology-IDIBELL, Gran  
32 Via de L'Hospitalet 199-203, 08908 L'Hospitalet de Llobregat, Spain  
33  
34  
35

36 <sup>5</sup> Research Group on Economic Evaluation and Health (GRAES), Reus, Spain  
37  
38

39 <sup>6</sup> Research Centre on Industrial and Public Economics, (CREIP), Reus, Spain.  
40  
41

42 <sup>7</sup> Health Services Research on Chronic Patients Network (REDISSEC), Madrid, Spain  
43  
44  
45

46  
47 Correspondence to: Professor Montserrat Rué, Basic Medical Sciences department,  
48 University of Lleida, Biomedicina II, Avda. Rovira Roure 80, 25198 Lleida, Spain. e-  
49 mail: montse.rue@cmb.udl.cat, phone: +34 973 702441.  
50  
51  
52

53  
54  
55  
56 Word count: 4,130 words  
57  
58  
59  
60

## ABSTRACT

**Objective:** The aim of this systematic review and meta-analysis of randomised controlled trials (RCTs) and observational studies is to assess the effect of decision aids (DAs) in women aged 50 and under facing the decision to be screened for breast cancer.

**Setting:** Screening for breast cancer.

**Intervention:** DAs aimed to help women make a deliberative choice regarding participation in mammography screening by providing information on the options and outcomes.

**Eligible studies:** We included published original, non-pilot, studies that assess the effect of DAs for breast cancer screening. We excluded the studies that evaluated only participation intention or actual uptake. The studies' risk of bias was assessed with the Cochrane Collaboration's tool for RCTs and the National Institutes of Health Quality Assessment Tool for non-RCTs.

**Primary and secondary outcomes:** The main outcome measures were informed choice, decisional conflict and/or confidence, and knowledge. Secondary outcomes were values, attitudes, uncertainty, and intention to be screened.

**Results:** A total of 607 studies were identified, but only three RCTs and one before-after study were selected. The use of DAs increased the proportion of women making an informed decision by 14%, 95% CI=[2%, 27%] and the proportion of women with adequate knowledge by 12%, 95% CI=[7%, 16%]. We observed heterogeneity among the studies in confidence in the decision. The meta-analysis of the RCTs showed a significant decrease in confidence in the decision and in intention to be screened .

**Conclusions:** Tools to aid decision-making in screening for breast cancer improve knowledge and promote informed decision; however we found divergent results on decisional conflict and confidence in the decision. Under the current paradigm change, which favours informed choice rather than maximising uptake, more research is necessary for the improvement of DAs.

**Keywords:** breast cancer, decision aid, mammography, screening, shared decision making.

**Strengths and limitations of this study**

- This is the first systematic review focused in the impact of DAs about breast cancer screening on informed choice, decisional conflict, knowledge, values, attitudes, and intention to be screened.
- The review focused on studies that assess DAs designed to inform and help women to decide, not on those aimed at encouraging participation and adherence.
- A limitation of the review is the reduced number of studies included, which can be explained by the recent development of DAs for breast cancer screening.
- There was variability in the type and amount of information included in the DAs and also in the information given to the control group, this variability may explain part of the significant heterogeneity in all the outcomes evaluated.
- The DAs were designed in Australia, the USA and Germany, and women included had higher education levels than women in the general population, limiting the generalisability of the results.



## INTRODUCTION

In Western countries, screening for breast cancer spread during the 1990s. There was a general consensus on the benefits of screening since several clinical trials in the US and Northern Europe estimated a statistically significant and clinically relevant reduction in mortality from breast cancer.<sup>1</sup> But, in the year 2000 the systematic review from Gotzsche et al. started a hot debate, still alive, on the relevance and magnitude of benefits and harms of breast cancer screening.<sup>2</sup>

More than two decades after the introduction of breast cancer mass screening, the evidence on the harm-benefit balance remains inconclusive. On the one hand, advances in adjuvant treatments, a multidisciplinary approach for breast cancer treatment, and earlier identification of symptoms by women, have diminished the impact of screening on breast cancer mortality reduction.<sup>3-5</sup> On the other hand, the evidence on adverse effects of screening, characterized by a high consensus on the risk of false positive results and lack of agreement on the size of overdiagnosis and overtreatment, show that the potential harms of screening are not insignificant.<sup>6-8</sup>

The current prevailing paradigm, which encourages participation, is changing. Two proposals are gaining strength. First, the need to inform women of potential benefits and harms of screening. Some propose not devoting more energy to increasing participation, but dedicating it to informing women to help them make the best decision based on their preferences and values.<sup>9-12</sup> Second, customising the screening strategies to individual risk. Some recent studies<sup>13-15</sup> based on mathematical models suggest that risk-based screening may increase benefits and reduce harms. The literature shows that both proposals are gaining strength.<sup>16,17</sup>

Decision aids (DA) are instruments that communicate evidence-based information on the benefits and harms of different health-care options to help people make informed choices. The Stacey et al. work,<sup>18</sup> a recently updated Cochrane systematic review on DAs for people facing treatment or screening decisions, included 105 published randomised controlled trials (RCTs) of DAs, 26 of which dealt with cancer screening (13 prostate, 10 colon, two breast, and one cervix) and four on breast cancer genetic

1  
2  
3 testing. The authors concluded that, compared with usual care, people exposed to DAs  
4 feel more knowledgeable, better informed, and clearer about their values, and they  
5 probably have a more active role in decision making and more accurate risk  
6 perceptions. In addition, Stacey et al.<sup>18</sup> think that more research is needed on their  
7 effects on adherence to the chosen option, cost-effectiveness, and use with lower  
8 literacy populations.  
9  
10

11  
12  
13  
14  
15 Information on cancer screening is often biased, incomplete and persuasive.<sup>19</sup> Some  
16 leaflets mention the possibility of harms, however they do not quantify them. In  
17 Europe, some organisations are providing information on benefits and harms of  
18 breast cancer screening, in particular, estimates of mortality reduction, and the  
19 frequency of false positive results of mammography and invasive tests (e.g. Cochrane  
20 collaboration, UK NHS Breast Screening Programme; German Institute for Quality and  
21 Efficiency in Health Care; Fundació Lliga per a la Investigació i Prevenció del Càncer  
22 and Agència de Salut Pública de Barcelona, in Catalonia (Spain)). Information on  
23 overdiagnosis appears in some of the information materials. Two recent studies<sup>11,20</sup>  
24 have compared the impact of adding information on overdiagnosis to support  
25 informed choice on breast cancer screening. In preparation for an PRCT on the effect  
26 of a DA in mass screening in two regions of Spain, we aimed to identify and summarise  
27 all the studies reporting the description and assessment of a DA when applied to  
28 women aged 50 and under facing the decision to be screened with mammography in a  
29 population-based screening or opportunistic case-finding framework. We expected to  
30 find that DAs improve knowledge of options, benefits, and harms; create accurate  
31 perceptions of benefits and harms; reduce decisional conflict; and enhance informed  
32 choice.  
33  
34  
35  
36  
37  
38  
39  
40  
41  
42  
43  
44  
45  
46  
47  
48  
49  
50  
51  
52  
53  
54  
55  
56  
57  
58  
59  
60

## METHODS

### Eligibility criteria

#### Types of studies

We included all the published studies with RCT or before-after designs that compared a DA to no intervention, usual care, or alternative interventions. The search date upper limit was December 31, 2016. Pilot studies were excluded.

#### Types of participants

Participants were women facing decisions about screening in a population-based screening or opportunistic case-finding framework within the age interval of recommended mammography screening. We excluded studies aimed at elderly women only, and studies where participants were asked to make hypothetical choices.

#### Types of interventions

DAs were defined as interventions aimed to help women make a deliberative choice regarding participation in mammography screening, by providing information on the options and outcomes. We excluded studies aimed at increasing participation or promoting adherence, and studies not carried out in the context of women facing a real decision.

#### Types of outcome measures

The primary outcomes were: informed choice based on values, decisional conflict and/or confidence, and knowledge. The secondary outcomes included: values and/or attitudes towards screening, proportion remaining undecided, and proportion reporting intention to be screened.

#### Language

We included articles reported in any language.

## Information sources

### Search methods for identification of studies

The search strategy was performed in MEDLINE and SCOPUS and adapted and replicated in EMBASE, CINAHL, PsycInfo, and the Cochrane Library Plus. The search included the key words “breast cancer” and “decision” (or “choice”) and “aid” (or “informed”) and “mammography” (or “mammogram”), within the paper title or the abstract. It excluded the key word “protocol” from the paper titles and allowed synonyms and free suffixes and prefixes. The reviews identified by this search, as well as the references that they included, were exhaustively used to refine the search strategy to ensure that all the possible relevant references for our review were identified (see online supplementary Appendix 1).

## Study selection and synthesis of results

All the studies satisfying the inclusion criteria regarding design, participants and interventions were included in this review. Selection and the assessment of risk of bias was independently conducted in pairs by four reviewers (MC, MJP, MMA, and MR). In the case of disagreement, studies were discussed by the whole team of reviewers until an agreement was reached.

### Data extraction

The data extraction for the selected studies was independently conducted by two reviewers (MMA and MR) and a consensus version was obtained. In the case that the necessary data was not provided in the articles, the corresponding authors were contacted.

### Risk of bias of individual studies

For the risk of bias assessment we used the *Cochrane risk of bias* tool for RCTs and the *National Institutes of Health quality assessment tool* for non-RCTs.<sup>21</sup> In case of non-RCTs, the selection, allocation and blinding assessments were not applicable.

1  
2  
3 Sampling bias (a problem for external validity) was assessed in all the included  
4 studies.  
5  
6

7  
8 The risk of bias (*low, unclear, or high*) was assessed considering the study design and  
9 the methodological quality of the studies. Data consistency was rated as *no*  
10 *inconsistency, inconsistency present, or not applicable* if there was only one study  
11 available, considering each outcome's direction, magnitude, and statistical significance  
12 over the set of included studies. The assessment methods followed the AHRQ  
13 "Methods Guide for Effectiveness and Comparative Effectiveness Reviews"  
14 ([www.effectivehealthcare.ahrq.gov/](http://www.effectivehealthcare.ahrq.gov/)) and were in accordance with the Preferred  
15 Reporting Items for Systematic Reviews and Meta-analyses (PRISMA) checklist.<sup>22</sup>  
16  
17  
18  
19  
20  
21  
22

### 23 Analysis of results

24  
25  
26 For each endpoint of interest, the decision to combine the results of the selected  
27 studies in a meta-analysis was based on the heterogeneity of patient populations and  
28 interventions, as well as on the methodological heterogeneity of study designs and  
29 reported outcomes. Consistency and heterogeneity of the studies' results were  
30 assessed with the  $I^2$  index and the Q test, respectively.  
31  
32  
33  
34  
35

36 If comparable measures were obtained, we pooled the data for the outcomes. To  
37 facilitate the data pooling, scores with different ranges (minimum and/or maximum  
38 values) were standardised to range from 0 to 100 points. We estimated a weighted  
39 effect intervention (with 95% confidence interval) as the difference between the  
40 intervention and control groups in experimental designs, and as changes from  
41 baseline assessed in outcome measures post-intervention in before-after studies.  
42 Mean differences or pooled relative risks (RR) were estimated for continuous or  
43 dichotomous outcomes, respectively. The summary effects of the intervention were  
44 obtained using random effects meta-analysis. An additional meta-analysis of the RCTs  
45 was performed. We used the library `metafor` of the R package.<sup>23</sup>  
46  
47  
48  
49  
50  
51  
52  
53  
54  
55  
56  
57  
58  
59  
60

## RESULTS

### Study selection

In total, we identified 607 unique citations from the electronic database searches. Of these, only 14 were selected for evaluation of the inclusion and exclusion criteria. Figure 1 presents the flowchart of the study selection process. Ten studies were excluded after full text assessment (see Table A2.1 in Appendix 2 for details). Finally, three randomised controlled studies (Mathieu 2010,<sup>24</sup> Gummersbach 2015,<sup>20</sup> and Hersch 2015,<sup>11</sup> and one before-after study, Eden 2015,<sup>25</sup> were selected. These four studies involved a total of 1650 participants from four countries (two from Australia, one each from Germany and the United States of America).

### Study characteristics

Table 1 presents the studies' characteristics. Gummersbach and Hersch compared two DAs with information about the benefits and harms of mammography screening, providing the intervention group with more complete information. Whereas Gummersbach added more critical information on the harms of screening mammography in the intervention group, the DA in Hersch only differed in providing thorough information of overdetected or not. In contrast, Mathieu compared a DA with receiving no information, and Eden assessed changes after providing a DA. It is important to notice that whereas Hersch and Gummersbach targeted women who were approaching 50 and deciding whether to screen as per their national program, Mathieu included younger women considering whether to start screening in their 40s, before the recommended age of 50 in Australia. Participants' characteristics are shown in Table 2. Means of age were located in the 40-50 yrs interval. There are differences between studies in the prevalence of previous mammograms and in education level.

**Table 1:** Description of the studies' characteristics

| Study            | Design                                              | Age group | Exclusion criteria                                                                                                                   | Decision aid (DA)                                                                                                                                                                                                                                                                                              |
|------------------|-----------------------------------------------------|-----------|--------------------------------------------------------------------------------------------------------------------------------------|----------------------------------------------------------------------------------------------------------------------------------------------------------------------------------------------------------------------------------------------------------------------------------------------------------------|
| Mathieu 2010     | Randomised controlled study, pragmatic <sup>a</sup> | 38-45     | Personal history of breast cancer (BC)                                                                                               | Web-based DA, information on possible screening outcomes and worksheet to help weigh up and clarify preferences. Intervention group: immediate access; control group: delayed access after completing the outcome measures.                                                                                    |
| Eden 2015        | Before-after study, clinical                        | 40-49     | Personal history of BC, prior breast biopsy, high risk of BC <sup>b</sup> , previous mammography within 1 year, non-English speaking | Web-based DA, in 3 rural clinical settings, including BC information and questions for risk and self-preferences assessment.                                                                                                                                                                                   |
| Gummersbach 2015 | Randomised controlled study, primary care based     | 48-49     | None                                                                                                                                 | Mailed leaflet, more informative (especially on overdiagnosis) for the intervention group. The leaflet was not created in accordance with published criteria for evidence-based patient information, but it contained much more information relevant to decision-making than the leaflet of the control group. |
| Hersch 2015      | Randomised controlled study, community-based        | 48-50     | Personal or strong family history of BC, BC risk higher than average, mammography in the past 2 years, non-English speaking          | Mailed DA, outcomes assessed by phone interview. Evidence-based explanatory and quantitative information on overdiagnosis, BC mortality reduction, and false positives for the intervention group vs. information on BC mortality reduction and false positives for the control group.                         |

<sup>a</sup>: The trial was advertised on the media. Women had free access to the site for eligibility assessment.

<sup>b</sup>: Breast cancer risk based on the Breast Cancer Genetics Referral Screening Tool (B-RST).

**Table 2:** Description of studies' participants

| Study            | Group        | Participants | Age Mean (SD)           | Previous mammography | University degree        |
|------------------|--------------|--------------|-------------------------|----------------------|--------------------------|
| Mathieu 2010     | Intervention | 172          | 41.9 (2.0) <sup>a</sup> | 53 (30.8%)           | 76 (44.2%) <sup>b</sup>  |
|                  | Control      | 212          | 41.8 (2.2) <sup>a</sup> | 52 (24.5%)           | 126 (59.4%) <sup>b</sup> |
| Eden 2015        | Before-After | 75           | 45.0 (2.5)              | 51 (68.0%)           | 34 (45.3%)               |
| Gummersbach 2015 | Intervention | 178          | 48.67 (0.79)            | <sup>c</sup>         | 33 (18.5%)               |
|                  | Control      | 175          | 48.76 (0.80)            | <sup>c</sup>         | 23 (13.2%)               |
| Hersch 2015      | Intervention | 419          | 49.67 (0.44)            | <sup>d</sup>         | 119 (28.4%)              |
|                  | Control      | 419          | 49.70 (0.44)            | <sup>d</sup>         | 123 (29.4%)              |

SD: Standard deviation.

<sup>a</sup> Out of the assessed participants, 116 and 198 in intervention and control group, respectively.

<sup>b</sup> Out of the assessed participants, 114 and 199 in intervention and control group, respectively.

<sup>c</sup> 3 and 4 women with BC in intervention and control group, respectively. Participants were not asked about mammographic exams in the past.

<sup>d</sup> No women with previous mammogram in the previous two years but it is not stated how many women had mammograms more than two years before being included in the study.

### Risk of bias in the included studies

The evaluation of the risk of bias for the RCTs included the assessment of bias in selection, performance, detection, attrition, reporting, sampling or any other source of bias. Details on the authors' judgement and rationale for risk of bias can be found in Tables A2.2-A2.5 (Appendix 2). The majority of assessed criteria were judged as low risk. Hersch 2015<sup>11</sup> was the only study free of a high risk of bias in all the domains assessed. Gummersbach 2015<sup>20</sup> was rated as having a high risk of attrition bias due to a high level of non-response. Mathieu 2010<sup>24</sup> was rated as having an unclear risk of allocation concealment and also of selective reporting. Eden 2015<sup>25</sup> included a small sample of women with greater than a high school education, in a single rural geographical area. Therefore, the sample representativeness was limited.



## Main outcomes

Tables 3 and 4 present the risk differences for the dichotomous outcomes and the mean differences for the continuous outcomes, respectively. Figures 2 and 3 show the results of the meta-analyses for the dichotomous and continuous outcomes, respectively. The results of the meta-analysis performed exclusively on the RCTs are presented in Table A3.1, Appendix 3.

### Informed choice

The DAs increased the proportion of women making an informed decision, 58.0% vs. 36.5% according to Mathieu ( $p < 0.001$ ) and 24.2% vs. 15.4% according to Hersch ( $p = 0.002$ ). The meta-analysis estimation of risk difference was 14%, 95% CI=[2%, 27%] (Table 3 and Figure 2).

### Decisional conflict and/or decisional confidence

Eden observed a significant post-intervention decrease in decisional conflict and a significant increase in decisional confidence (Table 4, Figure 3). In contrast, Hersch noted no significant effect of the intervention on decisional conflict and a significant decrease in decisional confidence, observed also by Gummersbach. These contradictory results introduced high heterogeneity that increased the uncertainty about the overall impact of a DA on decisional conflict and/or confidence (Figure 3). The meta-analysis of the RCTs showed a significant decrease in the confidence scale (Table A3.1, Appendix 3).

### Knowledge

The use of a DA increased knowledge according to all studies, although the positive difference was not statistically significant in the Gummersbach study (Tables 3 and 4). The overall results provided by the meta-analyses were statistically significant, either in the proportion of women with adequate knowledge, with a significant increase of 12%, 95% CI=[7%, 16%], or in the mean score, with a difference of 0.70 out of 10 points, 95% CI =[0.27, 1.13] (Figures 2 and 3).

1  
2  
3  
4  
5  
6  
7  
8  
9  
10  
11  
12  
13  
14  
15  
16  
17  
18  
19  
20  
21  
22  
23  
24  
25  
26  
27  
28  
29  
30  
31  
32  
33  
34  
35  
36  
37  
38  
39  
40  
41  
42  
43  
44  
45  
46  
47  
48  
49  
50  
51  
52  
53  
54  
55  
56  
57  
58  
59  
60

For peer review only

**Table 3:** Risk differences for the dichotomous outcomes: informed choice, knowledge, positive attitudes/values towards screening, undecided and intention to be screened.

| Outcome                         | Study                     | Group        | Assessed | n(%)                    | Difference, <i>p-value</i> <sup>a</sup> |
|---------------------------------|---------------------------|--------------|----------|-------------------------|-----------------------------------------|
| Informed choice <sup>b</sup>    | Mathieu 2010 <sup>c</sup> | Intervention | 112      | 65 (58.0%)              | 21.5%, <i>p</i> <0.001                  |
|                                 |                           | Control      | 192      | 70 (36.5%)              |                                         |
|                                 | Hersch 2015 <sup>d</sup>  | Intervention | 409      | 99 (24.2%)              | 8.8%, <i>p</i> =0.0017                  |
|                                 |                           | Control      | 408      | 63 (15.4%)              |                                         |
| Knowledge                       | Mathieu 2010 <sup>e</sup> | Intervention | 113      | 106 (93.8%)             | 10.7%, <i>p</i> =0.01                   |
|                                 |                           | Control      | 189      | 157 (83.1%)             |                                         |
|                                 | Hersch 2015 <sup>f</sup>  | Intervention | 419      | 122 (29.1%)             | 13.0%, <i>p</i> <0.001                  |
|                                 |                           | Control      | 419      | 71 (16.9%)              |                                         |
| Positive attitudes <sup>g</sup> | Mathieu 2010              | Intervention | 111      | 88 (79.3%)              | 0.2%, <i>p</i> =0.89                    |
|                                 |                           | Control      | 182      | 144 (79.1%)             |                                         |
|                                 | Hersch 2015               | Intervention | 409      | 282 (68.9%)             | -14.4%, <i>p</i> <0.001                 |
|                                 |                           | Control      | 408      | 340 (83.3%)             |                                         |
| Undecided                       | Mathieu 2010              | Intervention | 117      | 21 (17.9%)              | -21.3%, <i>p</i> <0.001                 |
|                                 |                           | Control      | 209      | 82 (39.2%)              |                                         |
|                                 | Hersch 2015               | Intervention | 419      | 69 (16.5%)              | 9.3%, <i>p</i> <0.001                   |
|                                 |                           | Control      | 419      | 30 (7.2%)               |                                         |
| Intention to be screened        | Mathieu 2010              | Intervention | 117      | 50 (42.7%)              | 3.0%, <i>p</i> =0.64                    |
|                                 |                           | Control      | 209      | 83 (39.7%)              |                                         |
|                                 | Eden 2015                 | Before       | 75       | 54 (72.0%)              | 6.7% <sup>h</sup> , <i>p</i> =0.123     |
|                                 |                           | After        | 75       | 59 (78.7%) <sup>h</sup> |                                         |
|                                 | Gummersbach 2015          | Intervention | 178      | 145 (81.5%)             | -7.1%, <i>p</i> =0.06                   |
|                                 |                           | Control      | 175      | 155 (88.6%)             |                                         |
|                                 | Hersch 2015               | Intervention | 419      | 308 (73.5%)             | -13.1%, <i>p</i> <0.001                 |
|                                 |                           | Control      | 419      | 363 (86.6%)             |                                         |

<sup>a</sup> Fisher's exact test.

<sup>b</sup> Eden provided only a post-intervention mean of the preparation for decision making scale of 73.2 (18.1).

<sup>c</sup> Out of the women assessed, including undecided women in the denominator.

<sup>d</sup> Informed choice defined as adequate knowledge and intentions consistent with attitudes.

<sup>e</sup> Knowledge (according to Mathieu): score higher than 5 out of 10.

<sup>f</sup> Knowledge (according to Hersch): Adequate knowledge when scoring at least 50% of the total available marks, including at least 1 numerical mark, on all three screening outcome subscales (breast cancer mortality benefit, false-positive screening result and overdiagnosis).

<sup>g</sup> Positive attitudes/values >50 out of 100 according to Mathieu and >=24 out of 30 according to Hersch.

<sup>h</sup> Difference as post minus pre-intervention values.

**Table 4:** Mean differences for the continuous outcomes: knowledge, decisional conflict, and decisional confidence.

| Outcome               | Study                         | Group        | N   | mean (SD)     | Difference p-value |
|-----------------------|-------------------------------|--------------|-----|---------------|--------------------|
| Knowledge             | Mathieu 2010 <sup>a</sup>     | Intervention | 113 | 7.35(1.84)    | 1.1, p<0.001       |
|                       |                               | Control      | 189 | 6.27(1.85)    |                    |
|                       | Gummersbach 2015 <sup>a</sup> | Intervention | 161 | 5.49 (1.99)   | 0.26, p=0.26       |
|                       |                               | Control      | 168 | 5.23 (2.06)   |                    |
|                       | Hersch 2015 <sup>b</sup>      | Intervention | 419 | 13.49(4.36)   | 1.65, p<0.001      |
|                       |                               | Control      | 419 | 11.84(3.74)   |                    |
| Decisional conflict   | Eden 2015 <sup>c</sup>        | Before       | 75  | 46.33 (27.04) | -38.0, p<0.001     |
|                       |                               | After        | 75  | 8.33 (15.58)  |                    |
|                       | Hersch 2015                   | Intervention | 419 | 12.55 (17.60) | 0.35, p=0.78       |
|                       |                               | Control      | 419 | 12.20 (18.90) |                    |
| Decisional confidence | Eden 2015 <sup>d</sup>        | Before       | 75  | 79.67 (18.62) | 16.16, p<0.001     |
|                       |                               | After        | 75  | 95.73 (6.86)  |                    |
|                       | Gummersbach 2015 <sup>e</sup> | Intervention | 178 | 5.15 (1.36)   | -0.37, p=0.017     |
|                       |                               | Control      | 182 | 5.52 (0.93)   |                    |
|                       | Hersch 2015 <sup>f</sup>      | Intervention | 419 | 4.35 (0.74)   | -0.18, p=0.0003    |
|                       |                               | Control      | 419 | 4.53 (0.67)   |                    |

<sup>a</sup> Knowledge scored, range 0-10.

<sup>b</sup> Knowledge scored, range 0-22.

<sup>c</sup> Decision conflict scale, range 0-100.

<sup>d</sup> Self-efficacy scale, range 0-100.

<sup>e</sup> Confidence scale, range 0-6.

<sup>f</sup> Confidence scale, range 0-5 (mean of 3 subscales).

## Secondary outcomes

The high heterogeneity of the results did not make it possible to reach conclusions about significant post-intervention changes or differences in secondary outcomes, such as positive attitudes and values towards screening, decisions about screening,

1  
2  
3 and intention to be screened (Table 3, Figure 2). The results of the meta-analysis  
4 performed exclusively on the RCTs are presented in Table A3.2, Appendix 3.  
5  
6

### 7 8 Positive attitudes/values towards screening 9

10 Mathieu did not show any significant difference in attitudes, but Hersch obtained a  
11 significantly lower frequency of women with positive attitudes towards screening  
12 among women receiving the DA with overdiagnosis information.  
13  
14  
15

### 16 17 Undecided about BC screening 18

19 Mathieu reported a significant decrease in the frequency of women undecided about  
20 BC screening after the DA administration. In contrast, Hersch obtained a significant  
21 increase for the intervention group, with the DA including thorough overdiagnosis  
22 information.  
23  
24  
25  
26

### 27 28 Intention to be screened 29

30 Hersch noted a statistically significant decrease in the intention to be screened and  
31 Gummersbach a nearly significant decrease. The meta-analysis of the RCTs showed a  
32 significant decrease in the intention to be screened, 7%, 95% CI=[2%, 15%] (Table  
33 A3.2, Appendix 3). The lower proportions intending to screen in the Mathieu study  
34 with respect to the other studies (Table 3) can be attributed to the fact that women  
35 were younger than 50, the recommended age for starting screening in Australia.  
36  
37  
38  
39  
40  
41  
42

## 43 44 **DISCUSSION** 45

### 46 47 **Summary of main results** 48

49 This systematic review includes three RCTs and one before-after study assessing DAs  
50 given to women facing the decision to be screened with mammography. There was  
51 variability in the type and amount of information included in the DAs, and also in the  
52 information given to the control group. This variability may explain in part, the  
53 significant heterogeneity in all the outcomes evaluated. Despite this heterogeneity, the  
54  
55  
56  
57  
58  
59  
60

1  
2  
3 meta-analysis revealed that DAs produce a statistically significant improvement in  
4 knowledge of screening outcomes as well as a significant increase in the frequency of  
5 women making an informed choice. However, no significant effects were observed for  
6 decision conflict, decision confidence and positive attitudes towards screening.  
7 Therefore, the overall conclusion from our review is that DAs significantly increase  
8 women's knowledge and therefore the proportion of women making an informed  
9 choice, but do not significantly modify attitudes or intentions towards screening. It is  
10 important to mention that when the meta-analysis was performed on the RCT  
11 subgroup we found a significant decrease in confidence in the decision and intention  
12 to be screened. This decrease in screening intention is consistent with the findings of  
13 Ivlev et al<sup>26</sup> in a recently published systematic review of the effect of DAs on women's  
14 intentions to undergo screening mammography in age groups where shared decision  
15 making is recommended.  
16  
17  
18  
19  
20  
21  
22  
23  
24  
25  
26

27 Similarly, no significant effects were observed for the secondary outcomes that  
28 measured the frequency of participants remaining undecided or choosing to be  
29 screened. More specifically, Eden detected a significant decrease in intra-individual  
30 post-intervention decision conflict, which was not observed by Hersch, when  
31 comparing women receiving a DA with overdiagnosis information vs. those without it.  
32 Indeed, Eden also obtained a significant improvement in intra-individual post-  
33 intervention decision confidence, while Gummersbach and Hersch obtained a  
34 significant decrease in decision confidence when comparing women receiving a DA  
35 with exhaustive information on screening side effects vs. those without it. This result  
36 can be explained by the impact of the information on adverse events of screening.  
37 Positive attitudes towards screening significantly decreased when overdiagnosis  
38 information was added to the DA, as observed by Hersch, in contrast with the absence  
39 of change observed by Mathieu. The frequency of women remaining undecided after  
40 DAs showed completely contradictory results. While Mathieu observed a very  
41 significant decrease, Hersch obtained a significant increase. The frequency of women  
42 decided to be screened showed a significant difference in the Hersch study, where a  
43 decrease was observed for the group provided with overdiagnosis information, while  
44  
45  
46  
47  
48  
49  
50  
51  
52  
53  
54  
55  
56  
57  
58  
59  
60

1  
2  
3 Gummersbach, the other study incorporating thorough information on mammography  
4 side effects, showed a nearly significant decrease.  
5  
6

## 7 8 **Quality of the evidence** 9

10 Risk of bias ratings show that the included studies had a low risk of bias in most of the  
11 assessed domains. There may have been publication bias due to failure to report  
12 negative findings. Several of the outcomes showed a high level of heterogeneity that  
13 limits the interpretation of the pooled effect size.  
14  
15  
16

## 17 18 **Strengths and limitations** 19

20 This is the first systematic review focused on the impact of DAs about breast cancer  
21 screening on informed choice and other relevant outcomes from the women's  
22 perspective. Our review focused on studies that assess DAs designed to inform and  
23 help women to decide, not on studies aimed at encouraging participation and  
24 adherence.  
25  
26  
27  
28  
29

30 Studies differed in design, especially in terms of the control group. In the Mathieu  
31 study,<sup>24</sup> the control group did not receive the DA until the outcome measures had  
32 been completed. The Eden study,<sup>25</sup> assessed the post-intervention intra-individual  
33 changes after the DA was provided. In the Gummersbach study,<sup>27</sup> a more informative  
34 leaflet was compared to a less informative one. Finally, in the Hersch study,<sup>11</sup> the  
35 intervention DA had evidence-based explanatory and quantitative information on  
36 overdiagnosis, breast cancer mortality reduction, and false positives, whereas the  
37 control DA included information on breast cancer mortality reduction and false  
38 positives. Previous knowledge was not measured in the Mathieu and Gummersbach  
39 RCTs, although one expects that both groups had similar knowledge about  
40 mammography screening at baseline. Hersch et al.<sup>11</sup> measured some basic knowledge  
41 at baseline using a subset of items and showed similar results between groups. In the  
42 Eden study, which assessed intra-individual changes, the DA was particularly useful  
43 for the least informed and least confident women. On the other hand, Gummersbach<sup>20</sup>  
44 noted that education level was positively associated with acquired knowledge and  
45  
46  
47  
48  
49  
50  
51  
52  
53  
54  
55  
56  
57  
58  
59  
60

1  
2  
3 that the less educated women had less relevant decisional knowledge after reading  
4 the leaflet, but they were more willing to undergo mammography than more educated  
5 women. Only the Hersch study included a follow-up for final screening participation,  
6 but the results are not published yet.  
7  
8  
9

10  
11 The limitations of the study are principally related with the generalisation of the  
12 results. Women included in the studies probably had a higher education level, greater  
13 health awareness, and were more actively involved in health care decisions, than  
14 women in the general population. In addition, the DAs were designed using specific  
15 data from Australia (Mathieu and Hersch), the United States (Eden) and Germany  
16 (Gummersbach), providing results which may not be generalisable to other countries.  
17 All studies evaluated the DAs only from the women's perspective, and in the context of  
18 research, where participants may have a higher level of commitment than women  
19 invited to participate in a breast screening program.  
20  
21  
22  
23  
24  
25  
26  
27

### 28 **Unanswered questions and future research**

29  
30  
31 Women should use DAs to be informed and support their decisions about breast  
32 cancer screening given their preferences and attitudes. It is important to ensure that  
33 the information provided is well understood by all women, including those with lower  
34 level of education.  
35  
36  
37  
38

39  
40 The Internet is an inexpensive tool for the dissemination of DAs or to provide  
41 additional information, if necessary, in order to present women with all the options  
42 available and the harms and benefits of each of them. But there are women that are  
43 not familiarised with or do not have access to the Internet and therefore other ways to  
44 disseminate information are also needed.  
45  
46  
47  
48

49  
50 According to Gummersbach the doctor's advice was the most important factor  
51 helping with the decision to be screened for almost half of the women. This result  
52 indicates the importance of shared decision-making, where DAs are essential tools.  
53 Shared decision-making can also help reduce decisional conflict and improve  
54 confidence when information on screening harms is provided.  
55  
56  
57  
58  
59  
60



1  
2  
3 As highlighted by Hersch et al., establishing what constitutes an informed choice, and  
4 what knowledge is needed in order to be informed, is an important issue and no  
5 consensus currently exists on what knowledge constitutes being objectively informed  
6 enough for an informed or shared decision. When Hersch et al. used an expert-led  
7 approach based on medical guidelines and underpinned by decision theory, which  
8 required numerical and conceptual knowledge, only 24% in the intervention group  
9 and 15% in the control group were assessed as informed. When only conceptual  
10 knowledge was required these proportions increased to 50% and 19%, respectively.  
11 Difficulties understanding quantitative information or the widespread positive value  
12 placed on cancer screening can produce a certain resistance to information on  
13 possible harms. Their study was the only one obtaining a significant increase in the  
14 amount of women remaining undecided about being screened in the group receiving  
15 information on overdiagnosis.  
16  
17  
18  
19  
20  
21  
22  
23  
24  
25  
26

27 The DAs of the included studies lacked detailed information on the outcomes of  
28 screening, detection, treatment, or financial strain and opportunity costs from the  
29 perspective of the society, which could be considered important for inclusion in future  
30 DAs.  
31  
32  
33  
34  
35

## 36 **Conclusions**

37  
38 DAs for breast cancer screening can improve knowledge and promote informed  
39 decision making, in accordance with their preferences, for women who face the  
40 decision of screening. However we found divergent results on decisional conflict and  
41 decision confidence. Under the new paradigm, which favours informed choice rather  
42 than maximising uptake, more research is necessary for the improvement of DA.  
43  
44  
45  
46  
47  
48  
49  
50

## 51 **Figure legends**

52  
53  
54  
55 Figure 1: Study flow diagram  
56  
57  
58  
59  
60

1  
2  
3 Figure 2: Meta-analysis of risk differences for the dichotomous outcomes (random  
4 effects model)  
5  
6  
7  
8  
9

10 Figure 2 footnote

11  
12 Heterogeneity measures: Informed choice:  $I^2=74.7\%$ , Q test p-value=0.047;  
13 Knowledge:  $I^2=0\%$ , Q test p-value=0.75; Positive attitudes:  $I^2=84.6\%$ , Q test p-  
14 value=0.011; Undecided:  $I^2=96.9\%$ , Q test p-value<0.001; Intention to be screened:  
15  $I^2=75.9\%$ , Q test p-value=0.008.  
16  
17  
18  
19  
20  
21  
22

23 Figure 3: Meta-analysis of mean differences in scores for the quantitative outcomes  
24 (random effects model)  
25  
26  
27  
28  
29

30 Figure 3 footnote

31  
32 Heterogeneity measures: Decision conflict:  $I^2=99.0\%$ , Q test p<0.001; Decision  
33 confidence:  $I^2=98.3\%$ , Q test p<0.001; Knowledge:  $I^2=75.7\%$ , Q test p=0.030.  
34  
35  
36  
37  
38  
39

## 40 The InforMa Group

41  
42 The members of the InforMa Study Group are (alphabetical order): ÀreaQ, *Evaluation*  
43 *and Qualitative Research, Barcelona*: Àngels Cardona, Núria Codern. *Canary Islands*  
44 *Health Service (SESCS)*: Lilisbeth Perestelo, Ana Toledo. *Universitat Autònoma de*  
45 *Barcelona (UAB)*: Maria Feijoo. *Cancer Prevention and Control Program, Catalan*  
46 *Institute of Oncology, L'Hospitalet de Llobregat, Barcelona*: Montse García, Carmen  
47 Vidal. *IRBLLEIDA-Universitat de Lleida*: Sara Buil, Clara Vinyals, Laia Vinyals,  
48 Montserrat Martínez-Alonso, Marta Ortega, Sandra Pla, Anna Pons-Rodríguez,  
49 Montserrat Rué, Jorge Soler. *URV (University Rovira i Virgili), Reus*: Misericòrdia Carles,  
50  
51  
52  
53  
54  
55  
56  
57  
58  
59  
60

1  
2  
3 Maria José Pérez, Roger Pla. *IMIM, Hospital del Mar Medical Research Institute,*  
4 *Barcelona:* Andrea Burón, Xavier Castells, Anabel Romero, Maria Sala.  
5  
6  
7

### 8 9 **Competing interests**

10  
11 All authors have completed the ICMJE uniform disclosure form at  
12 [www.icmje.org/coi\\_disclosure.pdf](http://www.icmje.org/coi_disclosure.pdf) and declare: funding from the Spanish Ministry of  
13 Health and the Biomedical Research Institute of Lleida (IRBLLEIDA) as described  
14 below; no financial relationships with any organisations that might have an interest in  
15 the submitted work in the previous three years; no other relationships or activities  
16 that could appear to have influenced the submitted work.  
17  
18  
19  
20  
21  
22  
23  
24

### 25 **Informed consent**

26  
27 Since the work does not involve direct research in human subjects, informed consent  
28 was not obtained. Nevertheless, the study was approved by the Ethics Committee of  
29 the Hospital Universitari Arnau de Vilanova in the city of Lleida (Spain).  
30  
31  
32  
33  
34

### 35 **Contributors and authorship**

36  
37 MMA, MC and MR designed the study. All authors contributed towards the execution  
38 of the study. MMA provided methodological expertise in systematic reviews and  
39 searching strategies. The selection and risk of bias assessment of each study was  
40 independently conducted in pairs by four reviewers (MC, MJP, MMA, and MR). AP  
41 contributed to extracting the information of the identified studies and assessing the  
42 inclusion criteria. MMA and MR wrote the first draft with guidance and contributions  
43 from MC, MJP, and MG. All authors read, provided critical feedback and approved the  
44 final manuscript.  
45  
46  
47  
48  
49  
50  
51  
52  
53  
54  
55  
56  
57  
58  
59  
60

## Acknowledgements

We thank Drs. Karen Eden and Jolyn Hersch for facilitating non-published data that enabled us to obtain summary measures of some outcomes in the performed meta-analyses, and Krystal A. Klein, PhD for her support in the Eden study data. We are indebted to Ivan Solà, from the Iberoamerican Cochrane Centre, for performing the search in the EMBASE, PsycINFO and CINAHL databases. We also thank Maria Feijoo-Cid, PhD and the manuscript reviewers for their insightful comments to the previous version of the manuscript, and JP Glutting for review and editing.

## Data Sharing Statement

No additional data available.

## Funding

This study was supported by the research grant “Women participation in decisions and strategies on early detection of breast cancer” (PI14/00113) from the Instituto de Salud Carlos III and cofunded by Fondo Europeo de Desarrollo Regional (FEDER) “Una manera de hacer Europa”. Anna Pons received a grant for PhD students from the Lleida Biomedical Research Institute (IRBLLEIDA).

## References

1. Rutqvist LE, Miller A, Andersson I, et al. Reduced breast-cancer mortality with mammography screening—an assessment of currently available data. *Int J Cancer* 1990;55:76-84.
2. Gotzsche PC, Olsen O. Is screening for breast cancer with mammography justifiable? *Lancet* 2000;355:129-134.
3. Berry DA, Cronin KA, Plevritis SK, et al. Effect of screening and adjuvant therapy on mortality from breast cancer. *N Engl J Med* 2005;353:1784-1792.
4. Siu A, U.S. Preventive Services Task Force. Screening for breast cancer: USPSTF recommendation statement. *Ann Intern Med* 2016;164:279-296.
5. Nelson HD, Fu R, Cantor A, Pappas M, Daegas M, Humphrey L. Effectiveness of breast cancer screening: systematic review and meta-analysis to update the 2009 U.S. Preventive Services Task Force recommendation. *Ann Intern Med* 2016;164:244-255.
6. Marmot MG, Altman DG, Cameron DA, Dewar JA, Thompson SG, Wilcox M. The benefits and harms of breast cancer screening: an independent review. *Br J Cancer* 2013;108:2205-2240.
7. Gotzsche PC, Jorgensen KJ. Screening for breast cancer with mammography. *Cochrane Database Syst Rev* 2013;6:CD001877.
8. Nelson HD, Pappas M, Cantor A, Griffin J, Daegas M, Humphrey L. Harms of breast cancer screening: systematic review to update the 2009 U.S. Preventive Services Task Force recommendation. *Ann Intern Med* 2016;164:256-267.9. Stefanek ME. Uninformed compliance or informed choice? A needed shift in our approach to cancer screening *J Natl Cancer Inst* 2011;103:1821-1826.
10. Strech D. Participation rate or informed choice? Rethinking the European key performance indicators for mammography screening. *Health Policy* 2014;115:100-103.

- 1  
2  
3 11. Hersch J, Barratt A, Jansen J, et al. Use of a decision aid including information on  
4 overdetected to support informed choice about breast cancer screening: a  
5 randomised controlled trial. *Lancet* 2015;385:1642-1652.  
6  
7  
8  
9  
10 12. Moynihan R, Nickel B, Hersch J, et al. Public opinions about overdiagnosis : A  
11 national community survey. *PLoS One* 2015;10(e0125165):1-13.  
12 doi:[10.1371/journal.pone.0125165](https://doi.org/10.1371/journal.pone.0125165).  
13  
14  
15  
16 13. Vilaprinoy E, Forné C, Carles M, et al. Cost-effectiveness and harm-benefit analyses  
17 of risk-based screening strategies for breast cancer. *PLoS One* 2014;9:e86858. doi:  
18 [10.1371/journal.pone.0086858](https://doi.org/10.1371/journal.pone.0086858).  
19  
20  
21  
22 14. Schousboe JT, Kerlikowske K, Loh A, Cummings SR. Personalizing mammography  
23 by breast density and other risk factors for breast cancer: analysis of health benefits  
24 and cost-effectiveness. *Ann Intern Med* 2011;155:10-20.  
25  
26  
27  
28 15. Ayer T, Alagoz O, Stout NK. OR Forum—A POMDP approach to personalize  
29 mammography screening decisions. *Operations Research* 2012;60:1019-1034.  
30  
31  
32  
33 16. Evans DG, Astley S, Stavrinou P, et al. *Improvement in risk prediction, early*  
34 *detection and prevention of breast cancer in the NHS Breast Screening Programme and*  
35 *Family History Clinic: A dual cohort study*. Southampton (UK): NIHR Journals Library:  
36 Programme Grants for Applied Research, No. 4.11; 2016.  
37  
38  
39  
40  
41 17. Wu YY, Yen MF, Yu CP, Chen HH. Individually tailored screening of breast cancer  
42 with genes, tumour phenotypes, clinical attributes, and conventional risk factors. *Br J*  
43 *Cancer* 2013;108:2241-2249.  
44  
45  
46  
47 18. Stacey D, Légaré F, Lewis K, et al. Decision aids for people facing health treatment  
48 or screening decisions. *Cochrane Database Syst Rev* 2017; Issue 4. Art. No.: CD001431.  
49 doi: [10.1002/14651858.CD001431.pub5](https://doi.org/10.1002/14651858.CD001431.pub5).  
50  
51  
52  
53 19. Dreier M, Borutta B, Seidel G, Mu I, Dierks M-I, Walter U. Communicating the  
54 benefits and harms of colorectal cancer screening needed for an informed choice : A  
55  
56  
57  
58  
59  
60

1  
2  
3 systematic evaluation of leaflets and booklets. *PLoS One* 2014;9.

4  
5 doi:[10.1371/journal.pone.0107575](https://doi.org/10.1371/journal.pone.0107575).

6  
7  
8 20. Gummersbach E, Schmitt J in der, Mortsiefer A, Abholz H-H, Wegscheider K,  
9 Pentzek M. Willingness to participate in mammography screening: a randomized  
10 controlled questionnaire study of responses to two patient information leaflets with  
11 different factual content. *Deutsches Ärzteblatt international* 2015;112:61-68.

12  
13  
14  
15  
16 21. National Institutes of Health. Quality Assessment Tool for before-after (pre-post)  
17 studies with no control group. Study Quality Assessment Tools.

18  
19  
20 [https://www.nhlbi.nih.gov/health-pro/guidelines/in-develop/cardiovascular-risk-](https://www.nhlbi.nih.gov/health-pro/guidelines/in-develop/cardiovascular-risk-reduction/tools/before-after)  
21 [reduction/tools/before-after](https://www.nhlbi.nih.gov/health-pro/guidelines/in-develop/cardiovascular-risk-reduction/tools/before-after) (accessed 11 May 2017).

22  
23 22. Moher D, Liberati A, Tetzlaff  
24 J, Altman DG, the PRISMA Group. Preferred reporting items for systematic reviews and  
25 meta-analyses: the PRISMA statement. *Int J Surg* 2010;8:336-341.

26  
27  
28 23. R Core Team. R: A language and environment for statistical computing. R  
29 Foundation for Statistical Computing, Vienna, Austria 2017. URL [https://www.R-](https://www.R-project.org/)  
30 [project.org/](https://www.R-project.org/).

31  
32  
33  
34 24. Mathieu E, Barratt A, McGeechan K, Davey H, Howard K, Houssami N. Helping  
35 women make choices about mammography screening: an online randomized trial of a  
36 decision aid for 40-year-old women. *Patient Educ Couns* 2010;81:63-72.

37  
38  
39  
40 25. Eden KB, Scariati P, Klein K, et al. Mammography decision aid reduces decisional  
41 conflict for women in their forties considering screening. *J Womens Health*  
42 2015;24:1013-1020.

43  
44  
45  
46 26. Ivlev I, Hickman EN, McDonagh MS, Eden KB. Women's change in intention to  
47 undergo screening mammography after using a patient decision aid: a systematic  
48 review and meta-analysis. *J Gen Intern Med* 2017; doi: 10.1007/s11606-017-4027-9

49  
50  
51  
52  
53 27. Gummersbach E, in der Schmitt J, Abholz H-H, Wegscheider K, Pentzek M.  
54 Effects of different information brochures on women's decision-making regarding  
55

1  
2  
3  
4  
5  
6  
7  
8  
9  
10  
11  
12  
13  
14  
15  
16  
17  
18  
19  
20  
21  
22  
23  
24  
25  
26  
27  
28  
29  
30  
31  
32  
33  
34  
35  
36  
37  
38  
39  
40  
41  
42  
43  
44  
45  
46  
47  
48  
49  
50  
51  
52  
53  
54  
55  
56  
57  
58  
59  
60

mammography screening: study protocol for a randomized controlled questionnaire study. *Trials* 2013;14:319. doi: 10.1186/1745-6215-14-319.

For peer review only



1  
2  
3  
4  
5  
6  
7  
8  
9  
10  
11  
12  
13  
14  
15  
16  
17  
18  
19  
20  
21  
22  
23  
24  
25  
26  
27  
28  
29  
30  
31  
32  
33  
34  
35  
36  
37  
38  
39  
40  
41  
42  
43  
44  
45  
46  
47  
48  
49  
50  
51  
52  
53  
54  
55  
56  
57  
58  
59  
60

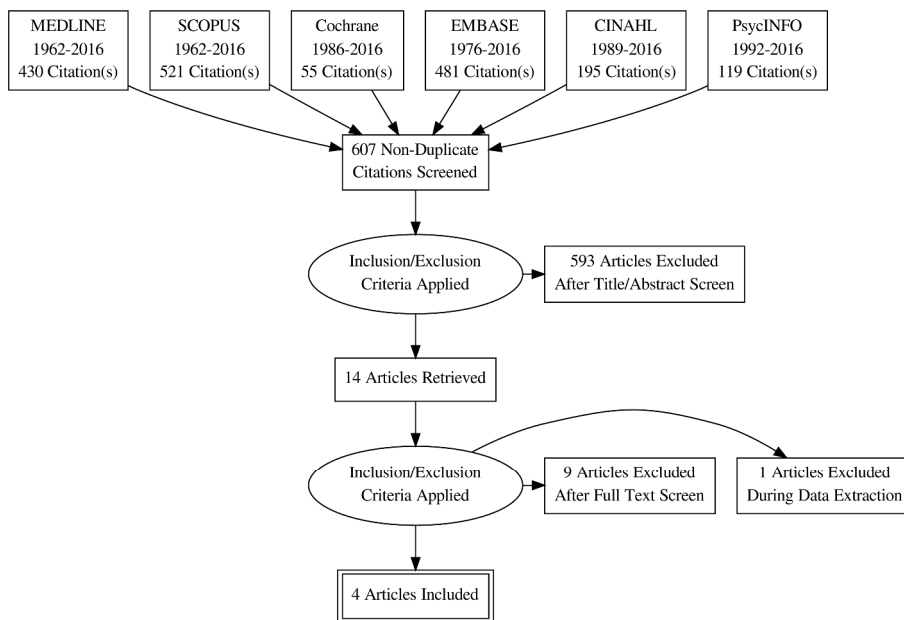

290x206mm (300 x 300 DPI)

Review only

1  
2  
3  
4  
5  
6  
7  
8  
9  
10  
11  
12  
13  
14  
15  
16  
17  
18  
19  
20  
21  
22  
23  
24  
25  
26  
27  
28  
29  
30  
31  
32  
33  
34  
35  
36  
37  
38  
39  
40  
41  
42  
43  
44  
45  
46  
47  
48  
49  
50  
51  
52  
53  
54  
55  
56  
57  
58  
59  
60

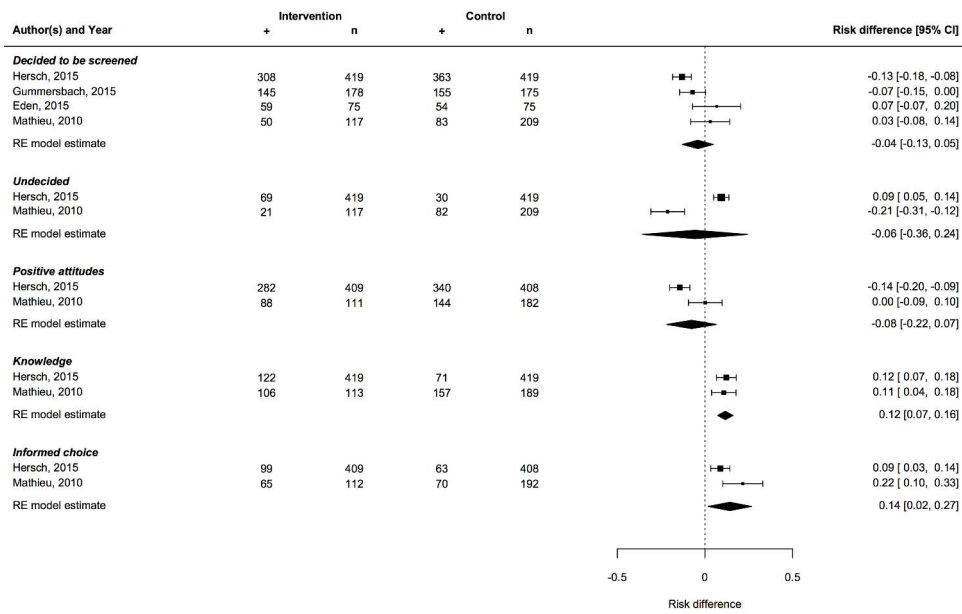

Figure 2: Meta-analysis of risk differences for the dichotomous outcomes (random effects model)

286x178mm (300 x 300 DPI)

1  
2  
3  
4  
5  
6  
7  
8  
9  
10  
11  
12  
13  
14  
15  
16  
17  
18  
19  
20  
21  
22  
23  
24  
25  
26  
27  
28  
29  
30  
31  
32  
33  
34  
35  
36  
37  
38  
39  
40  
41  
42  
43  
44  
45  
46  
47  
48  
49  
50  
51  
52  
53  
54  
55  
56  
57  
58  
59  
60

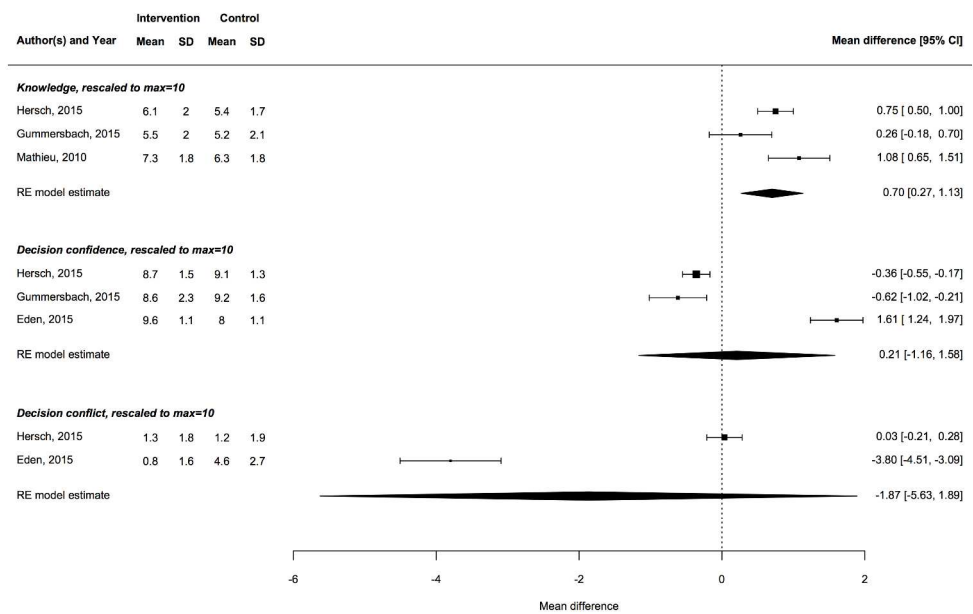

Figure 3: Meta-analysis of mean differences in scores for the quantitative outcomes (random effects model)

286x178mm (300 x 300 DPI)

Review only

## APPENDIX 1

### Search criteria for Decision Aids on breast cancer screening

1. In MEDLINE:  
 “breast cancer”[tiab] (decision[tiab] OR choice[tiab]) AND (aid[tiab] OR informed[tiab]) AND (mammography[tiab] OR mammogram[tiab]) NOT protocol[ti]
2. Adapting it to SCOPUS:  
 (TITLE-ABS-KEY (“breast cancer”) AND ( TITLE-ABS-KEY (decision) OR TITLE-ABS-KEY (choice) ) AND( TITLE-ABS-KEY (aid) OR TITLE-ABS-KEY (informed) ) AND ( TITLE-ABS-KEY (mammography) OR TITLE-ABS-KEY (mammogram) ) AND NOT TITLE (protocol )
3. And, equivalently for EMBASE, CINAHL, PsycInfo, and the Cochrane Library Plus.

## APPENDIX 2

**Table A2. 1:** Excluded studies after full text assessment

| Study           | Reason of exclusion                                                                                                                |
|-----------------|------------------------------------------------------------------------------------------------------------------------------------|
| Lawrence 2000   | No adequate evaluation of the decision aid (DA), only acceptability is assessed.                                                   |
| Webster 2007    | No adequate evaluation of the DA, no DA but a leaflet is assessed.                                                                 |
| Bodurtha 2009   | No adequate evaluation of the DA, no decision is assessed.                                                                         |
| Pasternack 2011 | No adequate evaluation of the DA, only acceptability is assessed.                                                                  |
| Waller 2013     | No adequate evaluation of the DA, only the design is described, no assessment is reported.                                         |
| Hersch 2014     | Pilot study of a main study already included.                                                                                      |
| Waller 2014     | No adequate evaluation of the DA, three formats of reporting information are compared.                                             |
| Berens 2015     | No adequate evaluation of the DA, no DA but a leaflet is assessed.                                                                 |
| Petrova 2015    | The DA is not assessed in a real context.                                                                                          |
| Bourmaud 2016   | No adequate evaluation of the DA. Informed choice is assessed only by participation rate. The overdiagnosis harm is not mentioned. |

## Characteristics of the included studies

**Table A2.2.** Study Characteristics

| <b>Mathieu 2010</b>                                       |                                                                                                                                                                                                                                                                                                     |                                                                                                                                                                                                                                                      |
|-----------------------------------------------------------|-----------------------------------------------------------------------------------------------------------------------------------------------------------------------------------------------------------------------------------------------------------------------------------------------------|------------------------------------------------------------------------------------------------------------------------------------------------------------------------------------------------------------------------------------------------------|
| <i>Methods</i>                                            | Online randomised controlled study of decision aid (DA) vs usual care (UC).                                                                                                                                                                                                                         |                                                                                                                                                                                                                                                      |
| <i>Setting</i>                                            | Australia, where biennial mammography screening is offered free of charge for all women over the age of 40, through a national population screening program. Women aged 50–69 years are invited by personal letter, and, women turning 40 are eligible for screening if they wish to start earlier. |                                                                                                                                                                                                                                                      |
| <i>Participants</i>                                       | 189 + 223 women, aged 38–45 years, who accessed the web site. Eligible if they were considering whether to (a) start screening in their 40s (ie before the recommended age of 50) or (b) wait until they were 50.                                                                                   |                                                                                                                                                                                                                                                      |
| <i>Interventions</i>                                      | DA: explained the benefits and harms, included a values clarification exercise and a worksheet to support decision making.<br>UC: delayed intervention                                                                                                                                              |                                                                                                                                                                                                                                                      |
| <i>Outcomes</i>                                           | Primary outcome: knowledge of benefits and harms of screening. Secondary outcomes: informed choice (composite of knowledge, values and intention), anxiety, acceptability of the DA, and intention regarding screening.                                                                             |                                                                                                                                                                                                                                                      |
| <b>Risk of bias</b>                                       |                                                                                                                                                                                                                                                                                                     |                                                                                                                                                                                                                                                      |
| <i>Bias</i>                                               | <i>Authors' judgement</i>                                                                                                                                                                                                                                                                           | <i>Support for judgement</i>                                                                                                                                                                                                                         |
| Random sequence generation (Selection bias)               | Low risk                                                                                                                                                                                                                                                                                            | Pg. 66 (randomization and baseline questions section): “computer generated simple randomization schedule”.                                                                                                                                           |
| Allocation concealment (Selection bias)                   | Unclear risk                                                                                                                                                                                                                                                                                        | Pg. 66 “randomization was conducted in a concealed manner.” The method of allocation concealment was not stated.                                                                                                                                     |
| Blinding of participants and personnel (Performance bias) | Unclear risk                                                                                                                                                                                                                                                                                        | Not reported                                                                                                                                                                                                                                         |
| Blinding of outcome assessment (Detection bias)           | Low risk                                                                                                                                                                                                                                                                                            | Unclear blinding but outcomes were not subjective to interpretation.                                                                                                                                                                                 |
| Incomplete outcomes' data. All outcomes (Attrition bias)  | Low risk                                                                                                                                                                                                                                                                                            | Table 2: all outcomes mentioned in the paper were reported in the Results section. Table 3: outcomes of anxiety and acceptability can be found. Page 69 explains missing data. Figures 1 and 2 provide the reasons for the exclusions in each group. |
| Selective reporting (Reporting bias)                      | Unclear risk                                                                                                                                                                                                                                                                                        | No mention of protocol.                                                                                                                                                                                                                              |
| Other bias (Sampling and other)                           | Low risk                                                                                                                                                                                                                                                                                            | Pg. 65: “To proceed, women were required to click in a box on the computer screen to indicate they had read the study information and were eligible to participate.” The trial was advertised on various websites and in a radio program.            |

**Table A2.3.** Study Characteristics

| <b>Eden 2015</b>                                                                                                                                                                                                            |                                                                                                                                                                               |                            |
|-----------------------------------------------------------------------------------------------------------------------------------------------------------------------------------------------------------------------------|-------------------------------------------------------------------------------------------------------------------------------------------------------------------------------|----------------------------|
| <i>Methods</i>                                                                                                                                                                                                              | Observational study. Women were assessed before and after the decision aid (DA).                                                                                              |                            |
| <i>Setting</i>                                                                                                                                                                                                              | Three clinics in the Oregon Rural Practice-Based Research Network (ORPRN), USA.                                                                                               |                            |
| <i>Participants</i>                                                                                                                                                                                                         | 75 women aged 40-49 years with no known risk factors associated with high or moderate risks for breast cancer and no mammography during the previous year.                    |                            |
| <i>Interventions</i>                                                                                                                                                                                                        | The decision aid (Mammopad) included modules on breast cancer, mammography, risk assessment, and priority setting about screening.                                            |                            |
| <i>Outcomes</i>                                                                                                                                                                                                             | Primary outcome: decisional conflict measured before and after using DA. Secondary outcomes: decision self-efficacy and intention to begin or continue mammography screening. |                            |
| <b>Criteria</b>                                                                                                                                                                                                             | <b>Yes/No</b>                                                                                                                                                                 | <b>Other (CD, NR, NA)*</b> |
| 1. Was the study question or objective clearly stated?                                                                                                                                                                      | Yes                                                                                                                                                                           |                            |
| 2. Were eligibility/selection criteria for the study population prespecified and clearly described?                                                                                                                         | Yes                                                                                                                                                                           |                            |
| 3. Were the participants in the study representative of those who would be eligible for the test/service/intervention in the general or clinical population of interest?                                                    | No                                                                                                                                                                            |                            |
| 4. Were all eligible participants that met the prespecified entry criteria enrolled?                                                                                                                                        | No                                                                                                                                                                            |                            |
| 5. Was the sample size sufficiently large to provide confidence in the findings?                                                                                                                                            | Yes                                                                                                                                                                           |                            |
| 6. Was the test/service/intervention clearly described and delivered consistently across the study population?                                                                                                              | Yes                                                                                                                                                                           |                            |
| 7. Were the outcome measures prespecified, clearly defined, valid, reliable, and assessed consistently across all study participants?                                                                                       | Yes                                                                                                                                                                           |                            |
| 8. Were the people assessing the outcomes blinded to the participants' exposures/interventions?                                                                                                                             | No                                                                                                                                                                            |                            |
| 9. Was the loss to follow-up after baseline 20% or less? Were those lost to follow-up accounted for in the analysis?                                                                                                        | Yes                                                                                                                                                                           |                            |
| 10. Did the statistical methods examine changes in outcome measures from before to after the intervention? Were statistical tests done that provided p values for the pre-to-post changes?                                  | Yes                                                                                                                                                                           |                            |
| 11. Were outcome measures of interest taken multiple times before the intervention and multiple times after the intervention (i.e., did they use an interrupted time-series design)?                                        | No                                                                                                                                                                            |                            |
| 12. If the intervention was conducted at a group level (e.g., a whole hospital, a community, etc.) did the statistical analysis take into account the use of individual-level data to determine effects at the group level? |                                                                                                                                                                               | NA                         |

\*CD, cannot determine; NA, not applicable; NR, not reported

National Institutes of Health. Quality Assessment Tool for before-after (pre-post) studies with no control group. Study Quality Assessment Tools. <https://www.nhlbi.nih.gov/health-pro/guidelines/in-develop/cardiovascular-risk-reduction/tools/before-after>. Accessed 11 May 2017.

**Table A2.4.** Study Characteristics

| <b>Gummersbach 2015</b>                                   |                                                                                                                                                            |                                                                                                                                                                                   |
|-----------------------------------------------------------|------------------------------------------------------------------------------------------------------------------------------------------------------------|-----------------------------------------------------------------------------------------------------------------------------------------------------------------------------------|
| <i>Methods</i>                                            | Randomised to two decision aids (DA) with different information.                                                                                           |                                                                                                                                                                                   |
| <i>Setting</i>                                            | Family practices in the German federal state of North Rhine–Westphalia. In Germany, screening is recommended biennially for all women aged 50 to 69.       |                                                                                                                                                                                   |
| <i>Participants</i>                                       | 353 women, aged 48–49 years, about to receive the first invitation to screening.                                                                           |                                                                                                                                                                                   |
| <i>Interventions</i>                                      | Intervention: DA with detailed information on screening harms.<br>Control: standard DA.                                                                    |                                                                                                                                                                                   |
| <i>Outcomes</i>                                           | Primary outcome: willingness to participate in screening.<br>Secondary outcomes: knowledge, decisional confidence, determinants of the screening decision. |                                                                                                                                                                                   |
| <b>Risk of bias</b>                                       |                                                                                                                                                            |                                                                                                                                                                                   |
| <i>Bias</i>                                               | <i>Authors' judgement</i>                                                                                                                                  | <i>Support for judgement</i>                                                                                                                                                      |
| Random sequence generation (Selection bias)               | Low risk                                                                                                                                                   | Pg. 62: “The 24 participants from each practice were selected by a computer-assisted random procedure.”                                                                           |
| Allocation concealment (Selection bias)                   | Low risk                                                                                                                                                   | Pg. 62: the group allotment process was also random.                                                                                                                              |
| Blinding of participants and personnel (Performance bias) | Low risk                                                                                                                                                   | Pg. 62: “The participants and their family physicians were blinded with respect to group allotment, but the study team was not”.                                                  |
| Blinding of outcome assessment (Detection bias)           | Low risk                                                                                                                                                   | Pg. 62: “The participants were asked by letter to fill out the questionnaire after reading the leaflet and to send it back in an envelope that was also enclosed in the mailing”. |
| Incomplete outcomes' data. All outcomes (Attrition bias)  | High risk                                                                                                                                                  | 46.7% non-response.                                                                                                                                                               |
| Selective reporting (Reporting bias)                      | Low risk                                                                                                                                                   | Pg. 63. Primary outcome was assessed in accordance with the protocol.                                                                                                             |
| Other bias (sampling bias)                                | Low risk                                                                                                                                                   | Participants recruited from family practices.                                                                                                                                     |

**Table A2.5.** Study Characteristics

| <b>Hersch 2015</b>                                        |                                                                                                                                                                                                                                                                                                |                                                                                                                                                                                                                                                                                                              |
|-----------------------------------------------------------|------------------------------------------------------------------------------------------------------------------------------------------------------------------------------------------------------------------------------------------------------------------------------------------------|--------------------------------------------------------------------------------------------------------------------------------------------------------------------------------------------------------------------------------------------------------------------------------------------------------------|
| <i>Methods</i>                                            | Randomised to two decision aids (DA) with different information.                                                                                                                                                                                                                               |                                                                                                                                                                                                                                                                                                              |
| <i>Setting</i>                                            | Community-based sample of women around the target age for starting breast screening, in New South Wales, Australia.                                                                                                                                                                            |                                                                                                                                                                                                                                                                                                              |
| <i>Participants</i>                                       | 879 women, aged 48-50 years, about to receive the first invitation to screening.                                                                                                                                                                                                               |                                                                                                                                                                                                                                                                                                              |
| <i>Interventions</i>                                      | Intervention: comprising evidence-based explanatory and quantitative information on over-detection, breast cancer mortality reduction, and false positives.<br>Control: decision aid including information on breast cancer mortality reduction and false positives.                           |                                                                                                                                                                                                                                                                                                              |
| <i>Outcomes</i>                                           | Primary outcome: informed choice defined as adequate knowledge and consistency between attitudes and screening intentions. Secondary outcomes: screening attitudes, decisional conflict, worry about breast cancer, intention about undergoing screening, and opinions about the decision aid. |                                                                                                                                                                                                                                                                                                              |
| <b>Risk of bias</b>                                       |                                                                                                                                                                                                                                                                                                |                                                                                                                                                                                                                                                                                                              |
| <i>Bias</i>                                               | <i>Authors' judgement</i>                                                                                                                                                                                                                                                                      | <i>Support for judgement</i>                                                                                                                                                                                                                                                                                 |
| Random sequence generation (Selection bias)               | Low risk                                                                                                                                                                                                                                                                                       | Pg. 1644: "A programmer who had no contact with participants generated the randomisation sequence using a computer system that was inaccessible until after recruitment... We assigned participants to either the intervention or control group in a 1:1 ratio with permuted block sizes of four and eight." |
| Allocation concealment (Selection bias)                   | Low risk                                                                                                                                                                                                                                                                                       | Pg. 1645: "Interviewers were unaware of the materials that women would receive (ensuring allocation concealment)."                                                                                                                                                                                           |
| Blinding of participants and personnel (Performance bias) | Low risk                                                                                                                                                                                                                                                                                       | Pg. 1645: "Double blinded. Women knew they would receive one of two versions of an information booklet but did not know how these differed or which one was the intervention. We designed the follow-up interview to ensure the group assignment was unclear to the interviewer until the final question."   |
| Blinding of outcome assessment (Detection bias)           | Low risk                                                                                                                                                                                                                                                                                       | Pg. 1645: "Researchers who analysed data were unaware of the random allocation."                                                                                                                                                                                                                             |
| Incomplete outcomes' data. All outcomes (Attrition bias)  | Low risk                                                                                                                                                                                                                                                                                       | Both groups have similar dropout rates.                                                                                                                                                                                                                                                                      |
| Selective reporting (Reporting bias)                      | Low risk                                                                                                                                                                                                                                                                                       | Pg. 5. Primary outcome was assessed in accordance with the protocol.                                                                                                                                                                                                                                         |
| Other bias                                                | Low risk                                                                                                                                                                                                                                                                                       | It seems free of other biases.                                                                                                                                                                                                                                                                               |



## APPENDIX 3

**Table A3.1.** Mean differences for the quantitative outcome decisional confidence. Meta-analysis of the RCTs

| Outcome               | Study                         | Group        | N   | Mean (SD)   | Difference, p-value               |
|-----------------------|-------------------------------|--------------|-----|-------------|-----------------------------------|
| Decisional confidence | Gummersbach 2015 <sup>a</sup> | Intervention | 178 | 5.15 (1.36) | -0.37, p=0.017                    |
|                       |                               | Control      | 182 | 5.52 (0.93) |                                   |
|                       | Hersch 2015 <sup>b</sup>      | Intervention | 419 | 4.35 (0.74) | -0.18, p=0.0003                   |
|                       |                               | Control      | 419 | 4.53 (0.67) |                                   |
| Summary               |                               |              |     |             | -0.42 [-0.64, -0.21] <sup>c</sup> |

Heterogeneity measures:  $I^2=21.7\%$ , Q test  $p=0.26$ .

<sup>a</sup> Confidence scale, range 0- 6.

<sup>b</sup> Confidence scale, range 0- 5 (mean of 3 subscales).

<sup>c</sup> Once re-scaled to a maximum score of 10.

**Table A3.2.** Risk differences for the dichotomous outcome informed choice. Meta-analysis of the RCTs

| Outcome                | Study            | Group        | Assessed | n (%)       | Difference, p-value <sup>a</sup>        |
|------------------------|------------------|--------------|----------|-------------|-----------------------------------------|
| Decided to be screened | Mathieu 2010     | Intervention | 117      | 50 (42.7%)  | 3.0% <sup>a</sup> , p=0.64              |
|                        |                  | Control      | 209      | 83 (39.7%)  |                                         |
|                        | Gummersbach 2015 | Intervention | 178      | 145 (81.5%) | -7.1%,<br>p=0.06 <sup>b</sup> 0.06      |
|                        |                  | Control      | 175      | 155 (88.6%) |                                         |
|                        | Hersch 2015      | Intervention | 419      | 308 (73.5%) | -13.1%,<br>p<0.001 <sup>c</sup> < 0.001 |
|                        |                  | Control      | 419      | 363 (86.6%) |                                         |
| Summary                |                  |              |          |             | -7% [-15%, -2%]                         |

<sup>a</sup> Fisher's exact test. Heterogeneity measures:  $I^2=73.7\%$ , Q test  $p=0.030$ .



# PRISMA 2009 Checklist

| Section/topic                      | #  | Checklist item                                                                                                                                                                                                                                                                                              | Reported on page # |
|------------------------------------|----|-------------------------------------------------------------------------------------------------------------------------------------------------------------------------------------------------------------------------------------------------------------------------------------------------------------|--------------------|
| <b>TITLE</b>                       |    |                                                                                                                                                                                                                                                                                                             |                    |
| Title                              | 1  | Identify the report as a systematic review, meta-analysis, or both.                                                                                                                                                                                                                                         | 1                  |
| <b>ABSTRACT</b>                    |    |                                                                                                                                                                                                                                                                                                             |                    |
| Structured summary                 | 2  | Provide a structured summary including, as applicable: background; objectives; data sources; study eligibility criteria, participants, and interventions; study appraisal and synthesis methods; results; limitations; conclusions and implications of key findings; systematic review registration number. | 2                  |
| <b>INTRODUCTION</b>                |    |                                                                                                                                                                                                                                                                                                             |                    |
| Rationale                          | 3  | Describe the rationale for the review in the context of what is already known.                                                                                                                                                                                                                              | 4-5                |
| Objectives                         | 4  | Provide an explicit statement of questions being addressed with reference to participants, interventions, comparisons, outcomes, and study design (PICOS).                                                                                                                                                  | 5                  |
| <b>METHODS</b>                     |    |                                                                                                                                                                                                                                                                                                             |                    |
| Protocol and registration          | 5  | Indicate if a review protocol exists, if and where it can be accessed (e.g., Web address), and, if available, provide registration information including registration number.                                                                                                                               | -                  |
| Eligibility criteria               | 6  | Specify study characteristics (e.g., PICOS, length of follow-up) and report characteristics (e.g., years considered, language, publication status) used as criteria for eligibility, giving rationale.                                                                                                      | 6                  |
| Information sources                | 7  | Describe all information sources (e.g., databases with dates of coverage, contact with study authors to identify additional studies) in the search and date last searched.                                                                                                                                  | 7                  |
| Search                             | 8  | Present full electronic search strategy for at least one database, including any limits used, such that it could be repeated.                                                                                                                                                                               | 7                  |
| Study selection                    | 9  | State the process for selecting studies (i.e., screening, eligibility, included in systematic review, and, if applicable, included in the meta-analysis).                                                                                                                                                   | 7                  |
| Data collection process            | 10 | Describe method of data extraction from reports (e.g., piloted forms, independently, in duplicate) and any processes for obtaining and confirming data from investigators.                                                                                                                                  | 7                  |
| Data items                         | 11 | List and define all variables for which data were sought (e.g., PICOS, funding sources) and any assumptions and simplifications made.                                                                                                                                                                       | 7                  |
| Risk of bias in individual studies | 12 | Describe methods used for assessing risk of bias of individual studies (including specification of whether this was done at the study or outcome level), and how this information is to be used in any data synthesis.                                                                                      | 7-8                |
| Summary measures                   | 13 | State the principal summary measures (e.g., risk ratio, difference in means).                                                                                                                                                                                                                               | 8                  |
| Synthesis of results               | 14 | Describe the methods of handling data and combining results of studies, if done, including measures of consistency (e.g., $I^2$ for each meta-analysis).                                                                                                                                                    | 8                  |

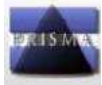

# PRISMA 2009 Checklist

Page 1 of 2

| Section/topic                 | #  | Checklist item                                                                                                                                                                                           | Reported on page # |
|-------------------------------|----|----------------------------------------------------------------------------------------------------------------------------------------------------------------------------------------------------------|--------------------|
| Risk of bias across studies   | 15 | Specify any assessment of risk of bias that may affect the cumulative evidence (e.g., publication bias, selective reporting within studies).                                                             | -                  |
| Additional analyses           | 16 | Describe methods of additional analyses (e.g., sensitivity or subgroup analyses, meta-regression), if done, indicating which were pre-specified.                                                         | -                  |
| <b>RESULTS</b>                |    |                                                                                                                                                                                                          |                    |
| Study selection               | 17 | Give numbers of studies screened, assessed for eligibility, and included in the review, with reasons for exclusions at each stage, ideally with a flow diagram.                                          | 8                  |
| Study characteristics         | 18 | For each study, present characteristics for which data were extracted (e.g., study size, PICOS, follow-up period) and provide the citations.                                                             | 9-11               |
| Risk of bias within studies   | 19 | Present data on risk of bias of each study and, if available, any outcome level assessment (see item 12).                                                                                                | 11                 |
| Results of individual studies | 20 | For all outcomes considered (benefits or harms), present, for each study: (a) simple summary data for each intervention group (b) effect estimates and confidence intervals, ideally with a forest plot. | 12-15              |
| Synthesis of results          | 21 | Present results of each meta-analysis done, including confidence intervals and measures of consistency.                                                                                                  | 12-15              |
| Risk of bias across studies   | 22 | Present results of any assessment of risk of bias across studies (see Item 15).                                                                                                                          | -                  |
| Additional analysis           | 23 | Give results of additional analyses, if done (e.g., sensitivity or subgroup analyses, meta-regression [see Item 16]).                                                                                    | -                  |
| <b>DISCUSSION</b>             |    |                                                                                                                                                                                                          |                    |
| Summary of evidence           | 24 | Summarize the main findings including the strength of evidence for each main outcome; consider their relevance to key groups (e.g., healthcare providers, users, and policy makers).                     | 15-16              |
| Limitations                   | 25 | Discuss limitations at study and outcome level (e.g., risk of bias), and at review-level (e.g., incomplete retrieval of identified research, reporting bias).                                            | 17-18              |
| Conclusions                   | 26 | Provide a general interpretation of the results in the context of other evidence, and implications for future research.                                                                                  | 18                 |
| <b>FUNDING</b>                |    |                                                                                                                                                                                                          |                    |
| Funding                       | 27 | Describe sources of funding for the systematic review and other support (e.g., supply of data); role of funders for the systematic review.                                                               | 21                 |

From: Moher D, Liberati A, Tetzlaff J, Altman DG, The PRISMA Group (2009). Preferred Reporting Items for Systematic Reviews and Meta-Analyses: The PRISMA Statement. PLoS Med 6(6): e1000097. doi:10.1371/journal.pmed1000097

For more information, visit: [www.prisma-statement.org](http://www.prisma-statement.org).

Page 2 of 2

For peer review only - <http://bmjopen.bmj.com/site/about/guidelines.xhtml>

# BMJ Open

## Assessment of the effects of decision aids about breast cancer screening: a systematic review and meta-analysis

|                                 |                                                                                                                                                                                                                                                                                                                                                                                                                                                                                                                                                                           |
|---------------------------------|---------------------------------------------------------------------------------------------------------------------------------------------------------------------------------------------------------------------------------------------------------------------------------------------------------------------------------------------------------------------------------------------------------------------------------------------------------------------------------------------------------------------------------------------------------------------------|
| Journal:                        | <i>BMJ Open</i>                                                                                                                                                                                                                                                                                                                                                                                                                                                                                                                                                           |
| Manuscript ID                   | bmjopen-2017-016894.R2                                                                                                                                                                                                                                                                                                                                                                                                                                                                                                                                                    |
| Article Type:                   | Research                                                                                                                                                                                                                                                                                                                                                                                                                                                                                                                                                                  |
| Date Submitted by the Author:   | 27-Jul-2017                                                                                                                                                                                                                                                                                                                                                                                                                                                                                                                                                               |
| Complete List of Authors:       | Martinez-Alonso, Montserrat; University of Lleida-IRBLLEIDA, Basic Medical Sciences<br>Carles-Lavila, Misericòrdia; University Rovira i Virgili, Economics; Research Centre on Industrial and Public Economics (CREIP)<br>Pérez-Lacasta, María José; University Rovira i Virgili, Economics<br>Pons-Rodriguez, Anna; Lleida Biomedical Research Institut (IRBLLEIDA)<br>Garcia, Montse; Catalan Institute of Oncology-IDIBELL<br>Rue, Montserrat; University of Lleida-IRBLLEIDA, Basic Medical Sciences; Health Services Research on Chronic Patients Network (REDISSEC) |
| <b>Primary Subject Heading</b>: | Communication                                                                                                                                                                                                                                                                                                                                                                                                                                                                                                                                                             |
| Secondary Subject Heading:      | Health services research, Health policy, Oncology, Public health                                                                                                                                                                                                                                                                                                                                                                                                                                                                                                          |
| Keywords:                       | breast cancer, decision aid, mammography, screening, shared decision making                                                                                                                                                                                                                                                                                                                                                                                                                                                                                               |
|                                 |                                                                                                                                                                                                                                                                                                                                                                                                                                                                                                                                                                           |

SCHOLARONE™  
Manuscripts

Only

1  
2  
3  
4  
5  
6  
7  
8  
9  
10  
11  
12  
13  
14  
15  
16  
17  
18  
19  
20  
21  
22  
23  
24  
25  
26  
27  
28  
29  
30  
31  
32  
33  
34  
35  
36  
37  
38  
39  
40  
41  
42  
43  
44  
45  
46  
47  
48  
49  
50  
51  
52  
53  
54  
55  
56  
57  
58  
59  
60

## Assessment of the effects of decision aids about breast cancer screening: a systematic review and meta-analysis

Montserrat Martínez-Alonso<sup>1,5</sup>, Misericòrdia Carles-Lavila<sup>2,5,6</sup>, Maria José Pérez-Lacasta<sup>2,5</sup>, Anna Pons-Rodríguez<sup>3</sup>, Montse Garcia<sup>4</sup>, Montserrat Rué<sup>1,5,7</sup>, on behalf of the InforMa Group

<sup>1</sup> Department of Basic Medical Sciences, University of Lleida-IRBLLEIDA, Avda. Rovira Roure 80, 25198 Lleida, Spain

<sup>2</sup> Department of Economics, University Rovira i Virgili, Avda. Universitat 1, 43204 Reus, Spain

<sup>3</sup> Lleida Biomedical Research Institut (IRBLLEIDA), Avda. Rovira Roure 80, 25198, Lleida, Spain

<sup>4</sup> Cancer Prevention and Control Program, Catalan Institute of Oncology-IDIBELL, Gran Via de L'Hospitalet 199-203, 08908 L'Hospitalet de Llobregat, Spain

<sup>5</sup> Research Group on Economic Evaluation and Health (GRAES), Reus, Spain

<sup>6</sup> Research Centre on Industrial and Public Economics, (CREIP), Reus, Spain.

<sup>7</sup> Health Services Research on Chronic Patients Network (REDISSEC), Madrid, Spain

Correspondence to: Professor Montserrat Rué, Basic Medical Sciences department, University of Lleida, Biomedicina II, Avda. Rovira Roure 80, 25198 Lleida, Spain. e-mail: montse.rue@cmb.udl.cat, phone: +34 973 702441.

Word count: 4,130 words

## ABSTRACT

**Objective:** The aim of this systematic review and meta-analysis of randomised controlled trials (RCTs) and observational studies is to assess the effect of decision aids (DAs) in women aged 50 and under facing the decision to be screened for breast cancer.

**Setting:** Screening for breast cancer.

**Intervention:** DAs aimed to help women make a deliberative choice regarding participation in mammography screening by providing information on the options and outcomes.

**Eligible studies:** We included published original, non-pilot, studies that assess the effect of DAs for breast cancer screening. We excluded the studies that evaluated only participation intention or actual uptake. The studies' risk of bias was assessed with the Cochrane Collaboration's tool for RCTs and the National Institutes of Health Quality Assessment Tool for non-RCTs.

**Primary and secondary outcomes:** The main outcome measures were informed choice, decisional conflict and/or confidence, and knowledge. Secondary outcomes were values, attitudes, uncertainty, and intention to be screened.

**Results:** A total of 607 studies were identified, but only three RCTs and one before-after study were selected. The use of DAs increased the proportion of women making an informed decision by 14%, 95% CI=[2%, 27%] and the proportion of women with adequate knowledge by 12%, 95% CI=[7%, 16%]. We observed heterogeneity among the studies in confidence in the decision. The meta-analysis of the RCTs showed a significant decrease in confidence in the decision and in intention to be screened.

**Conclusions:** Tools to aid decision-making in screening for breast cancer improve knowledge and promote informed decision; however we found divergent results on decisional conflict and confidence in the decision. Under the current paradigm change, which favours informed choice rather than maximising uptake, more research is necessary for the improvement of DAs.

**Keywords:** breast cancer, decision aid, mammography, screening, shared decision making.

### Strengths and limitations of this study

- This is the first systematic review focused in the impact of DAs about breast cancer screening on informed choice, decisional conflict, knowledge, values, attitudes, and intention to be screened.
- The review focused on studies that assess DAs designed to inform and help women to decide, not on those aimed at encouraging participation and adherence.
- A limitation of the review is the reduced number of studies included, which can be explained by the recent development of DAs for breast cancer screening.
- There was variability in the type and amount of information included in the DAs and also in the information given to the control group, this variability may explain part of the significant heterogeneity in all the outcomes evaluated.
- The DAs were designed in Australia, the USA and Germany, and women included had higher education levels than women in the general population, limiting the generalisability of the results.

## INTRODUCTION

In Western countries, screening for breast cancer spread during the 1990s. There was a general consensus on the benefits of screening since several clinical trials in the US and Northern Europe estimated a statistically significant and clinically relevant reduction in mortality from breast cancer.<sup>1</sup> But, in the year 2000 the systematic review from Gotzsche et al. started a hot debate, still alive, on the relevance and magnitude of benefits and harms of breast cancer screening.<sup>2</sup>

More than two decades after the introduction of breast cancer mass screening, the evidence on the harm-benefit balance remains inconclusive. On the one hand, advances in adjuvant treatments, a multidisciplinary approach for breast cancer treatment, and earlier identification of symptoms by women, have diminished the impact of screening on breast cancer mortality reduction.<sup>3-5</sup> On the other hand, the evidence on adverse effects of screening, characterized by a high consensus on the risk of false positive results and lack of agreement on the size of overdiagnosis and overtreatment, show that the potential harms of screening are not insignificant.<sup>6-8</sup>

The current prevailing paradigm, which encourages participation, is changing. Two proposals are gaining strength. First, the need to inform women of potential benefits and harms of screening. Some propose not devoting more energy to increasing participation, but dedicating it to informing women to help them make the best decision based on their preferences and values.<sup>9-12</sup> Second, customising the screening strategies to individual risk. Some recent studies<sup>13-15</sup> based on mathematical models suggest that risk-based screening may increase benefits and reduce harms. The literature shows that both proposals are gaining strength.<sup>16,17</sup>

Decision aids (DA) are instruments that communicate evidence-based information on the benefits and harms of different health-care options to help people make informed choices. The Stacey et al. work,<sup>18</sup> a recently updated Cochrane systematic review on DAs for people facing treatment or screening decisions, included 105 published randomised controlled trials (RCTs) of DAs, 26 of which dealt with cancer screening (13 prostate, 10 colon, two breast, and one cervix) and four on breast cancer genetic



1  
2  
3 testing. The authors concluded that, compared with usual care, DAs increase  
4 participants' knowledge, objectively measured. In addition, people exposed to DAs feel  
5 more knowledgeable, better informed, and clearer about their values, and they  
6 probably have a more active role in decision making and more accurate risk  
7 perceptions. In addition, Stacey et al.<sup>18</sup> think that more research is needed on their  
8 effects on adherence to the chosen option, cost-effectiveness, and use with lower  
9 literacy populations.  
10

11  
12 Information on cancer screening is often biased, incomplete and persuasive.<sup>19</sup> Some  
13 leaflets mention the possibility of harms, however they do not quantify them. In  
14 Europe, some organisations are providing information on benefits and harms of  
15 breast cancer screening, in particular, estimates of mortality reduction, and the  
16 frequency of false positive results of mammography and invasive tests (e.g. Cochrane  
17 collaboration, UK NHS Breast Screening Programme; German Institute for Quality and  
18 Efficiency in Health Care; Fundació Lliga per a la Investigació i Prevenció del Càncer  
19 and Agència de Salut Pública de Barcelona, in Catalonia (Spain)). Information on  
20 overdiagnosis appears in some of the information materials. Two recent studies<sup>11,20</sup>  
21 have compared the impact of adding information on overdiagnosis to support  
22 informed choice on breast cancer screening. In preparation for an PRCT on the effect  
23 of a DA in mass screening in two regions of Spain, we aimed to identify and summarise  
24 all the studies reporting the description and assessment of a DA when applied to  
25 women aged 50 and under facing the decision to be screened with mammography in a  
26 population-based screening or opportunistic case-finding framework. We expected to  
27 find that DAs improve knowledge of options, benefits, and harms; create accurate  
28 perceptions of benefits and harms; reduce decisional conflict; and enhance informed  
29 choice.  
30  
31  
32  
33  
34  
35  
36  
37  
38  
39  
40  
41  
42  
43  
44  
45  
46  
47  
48  
49  
50  
51  
52  
53  
54  
55  
56  
57  
58  
59  
60

## METHODS

### Eligibility criteria

#### Types of studies

We included all the published studies with RCT or before-after designs that compared a DA to no intervention, usual care, or alternative interventions. The search date upper limit was December 31, 2016. Pilot studies were excluded.

#### Types of participants

Participants were women facing decisions about screening in a population-based screening or opportunistic case-finding framework within the age interval of recommended mammography screening. We excluded studies aimed at elderly women only, and studies where participants were asked to make hypothetical choices.

#### Types of interventions

DAs were defined as interventions aimed to help women make a deliberative choice regarding participation in mammography screening, by providing information on the options and outcomes. We excluded studies aimed at increasing participation or promoting adherence, and studies not carried out in the context of women facing a real decision.

#### Types of outcome measures

The primary outcomes were: informed choice based on values, decisional conflict and/or confidence, and knowledge. The secondary outcomes included: values and/or attitudes towards screening, proportion remaining undecided, and proportion reporting intention to be screened.

#### Language

We included articles reported in any language.

## Information sources

### Search methods for identification of studies

The search strategy was performed in MEDLINE and SCOPUS and adapted and replicated in EMBASE, CINAHL, PsycInfo, and the Cochrane Library Plus. The search included the key words “breast cancer” and “decision” (or “choice”) and “aid” (or “informed”) and “mammography” (or “mammogram”), within the paper title or the abstract. It excluded the key word “protocol” from the paper titles and allowed synonyms and free suffixes and prefixes. The reviews identified by this search, as well as the references that they included, were exhaustively used to refine the search strategy to ensure that all the possible relevant references for our review were identified (see online supplementary Appendix 1).

## Study selection and synthesis of results

All the studies satisfying the inclusion criteria regarding design, participants and interventions were included in this review. Selection and the assessment of risk of bias was independently conducted in pairs by four reviewers (MC, MJP, MMA, and MR). In the case of disagreement, studies were discussed by the whole team of reviewers until an agreement was reached.

### Data extraction

The data extraction for the selected studies was independently conducted by two reviewers (MMA and MR) and a consensus version was obtained. In the case that the necessary data was not provided in the articles, the corresponding authors were contacted.

### Risk of bias of individual studies

For the risk of bias assessment we used the *Cochrane risk of bias* tool for RCTs and the *National Institutes of Health quality assessment tool* for non-RCTs.<sup>21</sup> In case of non-RCTs, the selection, allocation and blinding assessments were not applicable.

1  
2  
3 Sampling bias (a problem for external validity) was assessed in all the included  
4 studies.  
5  
6

7  
8 The risk of bias (*low, unclear, or high*) was assessed considering the study design and  
9 the methodological quality of the studies. Data consistency was rated as *no*  
10 *inconsistency, inconsistency present, or not applicable* if there was only one study  
11 available, considering each outcome's direction, magnitude, and statistical significance  
12 over the set of included studies. The assessment methods followed the AHRQ  
13 "Methods Guide for Effectiveness and Comparative Effectiveness Reviews"  
14 ([www.effectivehealthcare.ahrq.gov/](http://www.effectivehealthcare.ahrq.gov/)) and were in accordance with the Preferred  
15 Reporting Items for Systematic Reviews and Meta-analyses (PRISMA) checklist.<sup>22</sup>  
16  
17  
18  
19  
20  
21  
22

### 23 Analysis of results

24  
25  
26 For each endpoint of interest, the decision to combine the results of the selected  
27 studies in a meta-analysis was based on the heterogeneity of patient populations and  
28 interventions, as well as on the methodological heterogeneity of study designs and  
29 reported outcomes. Consistency and heterogeneity of the studies' results were  
30 assessed with the  $I^2$  index and the Q test, respectively.  
31  
32  
33  
34  
35

36 If comparable measures were obtained, we pooled the data for the outcomes. To  
37 facilitate the data pooling, scores with different ranges (minimum and/or maximum  
38 values) were standardised to range from 0 to 100 points. We estimated a weighted  
39 effect intervention (with 95% confidence interval) as the difference between the  
40 intervention and control groups in experimental designs, and as changes from  
41 baseline assessed in outcome measures post-intervention in before-after studies.  
42 Mean differences or pooled relative risks (RR) were estimated for continuous or  
43 dichotomous outcomes, respectively. The summary effects of the intervention were  
44 obtained using random effects meta-analysis. An additional meta-analysis of the RCTs  
45 was performed. We used the library `metafor` of the R package.<sup>23</sup>  
46  
47  
48  
49  
50  
51  
52  
53  
54  
55  
56  
57  
58  
59  
60

## RESULTS

### Study selection

In total, we identified 607 unique citations from the electronic database searches. Of these, only 14 were selected for evaluation of the inclusion and exclusion criteria. Figure 1 presents the flowchart of the study selection process. Ten studies were excluded after full text assessment (see Table A2.1 in Appendix 2 for details). Finally, three randomised controlled studies (Mathieu 2010,<sup>24</sup> Gummersbach 2015,<sup>20</sup> and Hersch 2015,<sup>11</sup> and one before-after study, Eden 2015,<sup>25</sup> were selected. These four studies involved a total of 1650 participants from four countries (two from Australia, one each from Germany and the United States of America).

### Study characteristics

Table 1 presents the studies' characteristics. Gummersbach and Hersch compared two DAs with information about the benefits and harms of mammography screening, providing the intervention group with more complete information. Whereas Gummersbach added more critical information on the harms of screening mammography in the intervention group, the DA in Hersch only differed in providing thorough information of overdetected or not. In contrast, Mathieu compared a DA with receiving no information, and Eden assessed changes after providing a DA. It is important to notice that whereas Hersch and Gummersbach targeted women who were approaching 50 and deciding whether to screen as per their national program, Mathieu included younger women considering whether to start screening in their 40s, before the recommended age of 50 in Australia. Participants' characteristics are shown in Table 2. Means of age were located in the 40-50 yrs interval. There are differences between studies in the prevalence of previous mammograms and in education level.

**Table 1:** Description of the studies' characteristics

| Study            | Design                                              | Age group | Exclusion criteria                                                                                                                   | Decision aid (DA)                                                                                                                                                                                                                                                                                              |
|------------------|-----------------------------------------------------|-----------|--------------------------------------------------------------------------------------------------------------------------------------|----------------------------------------------------------------------------------------------------------------------------------------------------------------------------------------------------------------------------------------------------------------------------------------------------------------|
| Mathieu 2010     | Randomised controlled study, pragmatic <sup>a</sup> | 38-45     | Personal history of breast cancer (BC)                                                                                               | Web-based DA, information on possible screening outcomes and worksheet to help weigh up and clarify preferences. Intervention group: immediate access; control group: delayed access after completing the outcome measures.                                                                                    |
| Eden 2015        | Before-after study, clinical                        | 40-49     | Personal history of BC, prior breast biopsy, high risk of BC <sup>b</sup> , previous mammography within 1 year, non-English speaking | Web-based DA, in 3 rural clinical settings, including BC information and questions for risk and self-preferences assessment.                                                                                                                                                                                   |
| Gummersbach 2015 | Randomised controlled study, primary care based     | 48-49     | None                                                                                                                                 | Mailed leaflet, more informative (especially on overdiagnosis) for the intervention group. The leaflet was not created in accordance with published criteria for evidence-based patient information, but it contained much more information relevant to decision-making than the leaflet of the control group. |
| Hersch 2015      | Randomised controlled study, community-based        | 48-50     | Personal or strong family history of BC, BC risk higher than average, mammography in the past 2 years, non-English speaking          | Mailed DA, outcomes assessed by phone interview. Evidence-based explanatory and quantitative information on overdiagnosis, BC mortality reduction, and false positives for the intervention group vs. information on BC mortality reduction and false positives for the control group.                         |

<sup>a</sup>: The trial was advertised on the media. Women had free access to the site for eligibility assessment.

<sup>b</sup>: Breast cancer risk based on the Breast Cancer Genetics Referral Screening Tool (B-RST).

**Table 2:** Description of studies' participants

| Study            | Group        | Participants | Age Mean (SD)           | Previous mammography | University degree        |
|------------------|--------------|--------------|-------------------------|----------------------|--------------------------|
| Mathieu 2010     | Intervention | 172          | 41.9 (2.0) <sup>a</sup> | 53 (30.8%)           | 76 (44.2%) <sup>b</sup>  |
|                  | Control      | 212          | 41.8 (2.2) <sup>a</sup> | 52 (24.5%)           | 126 (59.4%) <sup>b</sup> |
| Eden 2015        | Before-After | 75           | 45.0 (2.5)              | 51 (68.0%)           | 34 (45.3%)               |
| Gummersbach 2015 | Intervention | 178          | 48.67 (0.79)            | <sup>c</sup>         | 33 (18.5%)               |
|                  | Control      | 175          | 48.76 (0.80)            | <sup>c</sup>         | 23 (13.2%)               |
| Hersch 2015      | Intervention | 419          | 49.67 (0.44)            | <sup>d</sup>         | 119 (28.4%)              |
|                  | Control      | 419          | 49.70 (0.44)            | <sup>d</sup>         | 123 (29.4%)              |

SD: Standard deviation.

<sup>a</sup> Out of the assessed participants, 116 and 198 in intervention and control group, respectively.

<sup>b</sup> Out of the assessed participants, 114 and 199 in intervention and control group, respectively.

<sup>c</sup> 3 and 4 women with BC in intervention and control group, respectively. Participants were not asked about mammographic exams in the past.

<sup>d</sup> No women with previous mammogram in the previous two years but it is not stated how many women had mammograms more than two years before being included in the study.

### Risk of bias in the included studies

The evaluation of the risk of bias for the RCTs included the assessment of bias in selection, performance, detection, attrition, reporting, sampling or any other source of bias. Details on the authors' judgement and rationale for risk of bias can be found in Tables A2.2-A2.5 (Appendix 2). The majority of assessed criteria were judged as low risk. Hersch 2015<sup>11</sup> was the only study free of a high risk of bias in all the domains assessed. Gummersbach 2015<sup>20</sup> was rated as having a high risk of attrition bias due to a high level of non-response. Mathieu 2010<sup>24</sup> was rated as having an unclear risk of allocation concealment and also of selective reporting. Eden 2015<sup>25</sup> included a small sample of women with greater than a high school education, in a single rural geographical area. Therefore, the sample representativeness was limited.

## Main outcomes

Tables 3 and 4 present the risk differences for the dichotomous outcomes and the mean differences for the continuous outcomes, respectively. Figures 2 and 3 show the results of the meta-analyses for the dichotomous and continuous outcomes, respectively. The results of the meta-analysis performed exclusively on the RCTs are presented in Table A3.1, Appendix 3.

### Informed choice

The DAs increased the proportion of women making an informed decision, 58.0% vs. 36.5% according to Mathieu ( $p < 0.001$ ) and 24.2% vs. 15.4% according to Hersch ( $p = 0.002$ ). The meta-analysis estimation of risk difference was 14%, 95% CI=[2%, 27%] (Table 3 and Figure 2).

### Decisional conflict and/or decisional confidence

Eden observed a significant post-intervention decrease in decisional conflict and a significant increase in decisional confidence (Table 4, Figure 3). In contrast, Hersch noted no significant effect of the intervention on decisional conflict and a significant decrease in decisional confidence, observed also by Gummersbach. These contradictory results introduced high heterogeneity that increased the uncertainty about the overall impact of a DA on decisional conflict and/or confidence (Figure 3). The meta-analysis of the RCTs showed a significant decrease in the confidence scale (Table A3.1, Appendix 3).

### Knowledge

The use of a DA increased knowledge according to all studies, although the positive difference was not statistically significant in the Gummersbach study (Tables 3 and 4). The overall results provided by the meta-analyses were statistically significant, either in the proportion of women with adequate knowledge, with a significant increase of 12%, 95% CI=[7%, 16%], or in the mean score, with a difference of 0.70 out of 10 points, 95% CI =[0.27, 1.13] (Figures 2 and 3).



1  
2  
3  
4  
5  
6  
7  
8  
9  
10  
11  
12  
13  
14  
15  
16  
17  
18  
19  
20  
21  
22  
23  
24  
25  
26  
27  
28  
29  
30  
31  
32  
33  
34  
35  
36  
37  
38  
39  
40  
41  
42  
43  
44  
45  
46  
47  
48  
49  
50  
51  
52  
53  
54  
55  
56  
57  
58  
59  
60

For peer review only

**Table 3:** Risk differences for the dichotomous outcomes: informed choice, knowledge, positive attitudes/values towards screening, undecided and intention to be screened.

| Outcome                         | Study                     | Group        | Assessed | n(%)                    | Difference, <i>p-value</i> <sup>a</sup> |
|---------------------------------|---------------------------|--------------|----------|-------------------------|-----------------------------------------|
| Informed choice <sup>b</sup>    | Mathieu 2010 <sup>c</sup> | Intervention | 112      | 65 (58.0%)              | 21.5%, <i>p</i> <0.001                  |
|                                 |                           | Control      | 192      | 70 (36.5%)              |                                         |
|                                 | Hersch 2015 <sup>d</sup>  | Intervention | 409      | 99 (24.2%)              | 8.8%, <i>p</i> =0.0017                  |
|                                 |                           | Control      | 408      | 63 (15.4%)              |                                         |
| Knowledge                       | Mathieu 2010 <sup>e</sup> | Intervention | 113      | 106 (93.8%)             | 10.7%, <i>p</i> =0.01                   |
|                                 |                           | Control      | 189      | 157 (83.1%)             |                                         |
|                                 | Hersch 2015 <sup>f</sup>  | Intervention | 419      | 122 (29.1%)             | 13.0%, <i>p</i> <0.001                  |
|                                 |                           | Control      | 419      | 71 (16.9%)              |                                         |
| Positive attitudes <sup>g</sup> | Mathieu 2010              | Intervention | 111      | 88 (79.3%)              | 0.2%, <i>p</i> =0.89                    |
|                                 |                           | Control      | 182      | 144 (79.1%)             |                                         |
|                                 | Hersch 2015               | Intervention | 409      | 282 (68.9%)             | -14.4%, <i>p</i> <0.001                 |
|                                 |                           | Control      | 408      | 340 (83.3%)             |                                         |
| Undecided                       | Mathieu 2010              | Intervention | 117      | 21 (17.9%)              | -21.3%, <i>p</i> <0.001                 |
|                                 |                           | Control      | 209      | 82 (39.2%)              |                                         |
|                                 | Hersch 2015               | Intervention | 419      | 69 (16.5%)              | 9.3%, <i>p</i> <0.001                   |
|                                 |                           | Control      | 419      | 30 (7.2%)               |                                         |
| Intention to be screened        | Mathieu 2010              | Intervention | 117      | 50 (42.7%)              | 3.0%, <i>p</i> =0.64                    |
|                                 |                           | Control      | 209      | 83 (39.7%)              |                                         |
|                                 | Eden 2015                 | Before       | 75       | 54 (72.0%)              | 6.7% <sup>h</sup> , <i>p</i> =0.123     |
|                                 |                           | After        | 75       | 59 (78.7%) <sup>h</sup> |                                         |
|                                 | Gummersbach 2015          | Intervention | 178      | 145 (81.5%)             | -7.1%, <i>p</i> =0.06                   |
|                                 |                           | Control      | 175      | 155 (88.6%)             |                                         |
|                                 | Hersch 2015               | Intervention | 419      | 308 (73.5%)             | -13.1%, <i>p</i> <0.001                 |
|                                 |                           | Control      | 419      | 363 (86.6%)             |                                         |

<sup>a</sup> Fisher's exact test.

<sup>b</sup> Eden provided only a post-intervention mean of the preparation for decision making scale of 73.2 (18.1).

<sup>c</sup> Out of the women assessed, including undecided women in the denominator.

<sup>d</sup> Informed choice defined as adequate knowledge and intentions consistent with attitudes.

<sup>e</sup> Knowledge (according to Mathieu): score higher than 5 out of 10.

<sup>f</sup> Knowledge (according to Hersch): Adequate knowledge when scoring at least 50% of the total available marks, including at least 1 numerical mark, on all three screening outcome subscales (breast cancer mortality benefit, false-positive screening result and overdiagnosis).

<sup>g</sup> Positive attitudes/values >50 out of 100 according to Mathieu and >=24 out of 30 according to Hersch.

<sup>h</sup> Difference as post minus pre-intervention values.

**Table 4:** Mean differences for the continuous outcomes: knowledge, decisional conflict, and decisional confidence.

| Outcome               | Study                         | Group        | N   | mean (SD)     | Difference p-value |
|-----------------------|-------------------------------|--------------|-----|---------------|--------------------|
| Knowledge             | Mathieu 2010 <sup>a</sup>     | Intervention | 113 | 7.35(1.84)    | 1.1, p<0.001       |
|                       |                               | Control      | 189 | 6.27(1.85)    |                    |
|                       | Gummersbach 2015 <sup>a</sup> | Intervention | 161 | 5.49 (1.99)   | 0.26, p=0.26       |
|                       |                               | Control      | 168 | 5.23 (2.06)   |                    |
|                       | Hersch 2015 <sup>b</sup>      | Intervention | 419 | 13.49(4.36)   | 1.65, p<0.001      |
|                       |                               | Control      | 419 | 11.84(3.74)   |                    |
| Decisional conflict   | Eden 2015 <sup>c</sup>        | Before       | 75  | 46.33 (27.04) | -38.0, p<0.001     |
|                       |                               | After        | 75  | 8.33 (15.58)  |                    |
|                       | Hersch 2015                   | Intervention | 419 | 12.55 (17.60) | 0.35, p=0.78       |
|                       |                               | Control      | 419 | 12.20 (18.90) |                    |
| Decisional confidence | Eden 2015 <sup>d</sup>        | Before       | 75  | 79.67 (18.62) | 16.16, p<0.001     |
|                       |                               | After        | 75  | 95.73 (6.86)  |                    |
|                       | Gummersbach 2015 <sup>e</sup> | Intervention | 178 | 5.15 (1.36)   | -0.37, p=0.017     |
|                       |                               | Control      | 182 | 5.52 (0.93)   |                    |
|                       | Hersch 2015 <sup>f</sup>      | Intervention | 419 | 4.35 (0.74)   | -0.18, p=0.0003    |
|                       |                               | Control      | 419 | 4.53 (0.67)   |                    |

<sup>a</sup> Knowledge scored, range 0-10.

<sup>b</sup> Knowledge scored, range 0-22.

<sup>c</sup> Decision conflict scale, range 0-100.

<sup>d</sup> Self-efficacy scale, range 0-100.

<sup>e</sup> Confidence scale, range 0-6.

<sup>f</sup> Confidence scale, range 0-5 (mean of 3 subscales).

## Secondary outcomes

The high heterogeneity of the results did not make it possible to reach conclusions about significant post-intervention changes or differences in secondary outcomes, such as positive attitudes and values towards screening, decisions about screening, and intention to be screened (Table 3, Figure 2). The results of the meta-analysis performed exclusively on the RCTs are presented in Table A3.2, Appendix 3.

### Positive attitudes/values towards screening

Mathieu did not show any significant difference in attitudes, but Hersch obtained a significantly lower frequency of women with positive attitudes towards screening among women receiving the DA with overdiagnosis information.

### Undecided about BC screening

Mathieu reported a significant decrease in the frequency of women undecided about BC screening after the DA administration. In contrast, Hersch obtained a significant increase for the intervention group, with the DA including thorough overdiagnosis information.

### Intention to be screened

Hersch noted a statistically significant decrease in the intention to be screened and Gummersbach a nearly significant decrease. The meta-analysis of the RCTs showed a significant decrease in the intention to be screened, 7%, 95% CI=[2%, 15%] (Table A3.2, Appendix 3). The lower proportions intending to screen in the Mathieu study with respect to the other studies (Table 3) can be attributed to the fact that women were younger than 50, the recommended age for starting screening in Australia.

## DISCUSSION

### Summary of main results

This systematic review includes three RCTs and one before-after study assessing DAs given to women facing the decision to be screened with mammography. There was variability in the type and amount of information included in the DAs, and also in the information given to the control group. This variability may explain in part, the significant heterogeneity in all the outcomes evaluated. Despite this heterogeneity, the meta-analysis revealed that DAs produce a statistically significant improvement in knowledge of screening outcomes as well as a significant increase in the frequency of

1  
2  
3 women making an informed choice. However, no significant effects were observed for  
4 decision conflict, decision confidence and positive attitudes towards screening.  
5 Therefore, the overall conclusion from our review is that DAs significantly increase  
6 women's knowledge and therefore the proportion of women making an informed  
7 choice, but do not significantly modify attitudes or intentions towards screening. It is  
8 important to mention that when the meta-analysis was performed on the RCT  
9 subgroup we found a significant decrease in confidence in the decision and intention  
10 to be screened. This decrease in screening intention is consistent with the findings of  
11 Ivlev et al<sup>26</sup> in a recently published systematic review of the effect of DAs on women's  
12 intentions to undergo screening mammography in age groups where shared decision  
13 making is recommended.  
14  
15  
16  
17  
18  
19  
20  
21  
22  
23

24 Similarly, no significant effects were observed for the secondary outcomes that  
25 measured the frequency of participants remaining undecided or choosing to be  
26 screened. More specifically, Eden detected a significant decrease in intra-individual  
27 post-intervention decision conflict, which was not observed by Hersch, when  
28 comparing women receiving a DA with overdiagnosis information vs. those without it.  
29 Indeed, Eden also obtained a significant improvement in intra-individual post-  
30 intervention decision confidence, while Gummersbach and Hersch obtained a  
31 significant decrease in decision confidence when comparing women receiving a DA  
32 with exhaustive information on screening adverse effects vs. those without it. This  
33 result can be explained by the impact of the information on adverse events of  
34 screening. Positive attitudes towards screening significantly decreased when  
35 overdiagnosis information was added to the DA, as observed by Hersch, in contrast  
36 with the absence of change observed by Mathieu. The frequency of women remaining  
37 undecided after DAs showed completely contradictory results. While Mathieu  
38 observed a very significant decrease, Hersch obtained a significant increase. The  
39 frequency of women decided to be screened showed a significant difference in the  
40 Hersch study, where a decrease was observed for the group provided with  
41 overdiagnosis information, while Gummersbach, the other study incorporating  
42  
43  
44  
45  
46  
47  
48  
49  
50  
51  
52  
53  
54  
55  
56  
57  
58  
59  
60

1  
2  
3 thorough information on mammography adverse effects, showed a nearly significant  
4 decrease.  
5  
6

## 7 8 **Quality of the evidence** 9

10 Risk of bias ratings show that the included studies had a low risk of bias in most of the  
11 assessed domains. There may have been publication bias due to failure to report  
12 negative findings. Several of the outcomes showed a high level of heterogeneity that  
13 limits the interpretation of the pooled effect size.  
14  
15  
16

## 17 18 **Strengths and limitations** 19

20 This is the first systematic review focused on the impact of DAs about breast cancer  
21 screening on informed choice and other relevant outcomes from the women's  
22 perspective. Our review focused on studies that assess DAs designed to inform and  
23 help women to decide, not on studies aimed at encouraging participation and  
24 adherence.  
25  
26  
27  
28  
29

30 Studies differed in design, especially in terms of the control group. In the Mathieu  
31 study,<sup>24</sup> the control group did not receive the DA until the outcome measures had  
32 been completed. The Eden study,<sup>25</sup> assessed the post-intervention intra-individual  
33 changes after the DA was provided. In the Gummersbach study,<sup>27</sup> a more informative  
34 leaflet was compared to a less informative one. Finally, in the Hersch study,<sup>11</sup> the  
35 intervention DA had evidence-based explanatory and quantitative information on  
36 overdiagnosis, breast cancer mortality reduction, and false positives, whereas the  
37 control DA included information on breast cancer mortality reduction and false  
38 positives. Previous knowledge was not measured in the Mathieu and Gummersbach  
39 RCTs, although one expects that both groups had similar knowledge about  
40 mammography screening at baseline. Hersch et al.<sup>11</sup> measured some basic knowledge  
41 at baseline using a subset of items and showed similar results between groups. In the  
42 Eden study, which assessed intra-individual changes, the DA was particularly useful  
43 for the least informed and least confident women. On the other hand, Gummersbach<sup>20</sup>  
44 noted that education level was positively associated with acquired knowledge and  
45  
46  
47  
48  
49  
50  
51  
52  
53  
54  
55  
56  
57  
58  
59  
60

1  
2  
3 that the less educated women had less relevant decisional knowledge after reading  
4 the leaflet, but they were more willing to undergo mammography than more educated  
5 women. Only the Hersch study included a follow-up for final screening participation,  
6 but the results are not published yet.  
7  
8  
9

10  
11 The limitations of the study are principally related with the generalisation of the  
12 results. Women included in the studies probably had a higher education level, greater  
13 health awareness, and were more actively involved in health care decisions, than  
14 women in the general population. In addition, the DAs were designed using specific  
15 data from Australia (Mathieu and Hersch), the United States (Eden) and Germany  
16 (Gummersbach), providing results which may not be generalisable to other countries.  
17 All studies evaluated the DAs only from the women's perspective, and in the context of  
18 research, where participants may have a higher level of commitment than women  
19 invited to participate in a breast screening program.  
20  
21  
22  
23  
24  
25  
26  
27

### 28 **Unanswered questions and future research**

29  
30  
31 Women should use DAs to be informed and support their decisions about breast  
32 cancer screening given their preferences and attitudes. It is important to ensure that  
33 the information provided is well understood by all women, including those with lower  
34 level of education.  
35  
36  
37  
38

39  
40 The Internet is an inexpensive tool for the dissemination of DAs or to provide  
41 additional information, if necessary, in order to present women with all the options  
42 available and the harms and benefits of each of them. But there are women that are  
43 not familiarised with or do not have access to the Internet and therefore other ways to  
44 disseminate information are also needed.  
45  
46  
47  
48

49  
50 According to Gummersbach the doctor's advice was the most important factor helping  
51 with the decision to be screened for almost half of the women. This result indicates  
52 the importance of shared decision-making, where DAs are essential tools. Shared  
53 decision-making can also help reduce decisional conflict and improve confidence  
54 when information on screening harms is provided. In our search we found 17 papers  
55  
56  
57  
58  
59  
60

1  
2  
3 that described interventions to increase uptake compared to four studies designed to  
4 increase knowledge about the benefits and harms of the intervention. Given that the  
5 search was not designed to identify studies with "increased uptake", this finding adds  
6 information to the important debate about medical ethics in relation to screening  
7 interventions - basically the old fashioned paternalistic attitude versus citizen  
8 involvement and shared decision-making.  
9

10  
11  
12  
13  
14  
15 As highlighted by Hersch et al., establishing what constitutes an informed choice, and  
16 what knowledge is needed in order to be informed, is an important issue and no  
17 consensus currently exists on what knowledge constitutes being objectively informed  
18 enough for an informed or shared decision. When Hersch et al. used an expert-led  
19 approach based on medical guidelines and underpinned by decision theory, which  
20 required numerical and conceptual knowledge, only 24% in the intervention group  
21 and 15% in the control group were assessed as informed. When only conceptual  
22 knowledge was required these proportions increased to 50% and 19%, respectively.  
23  
24 Difficulties understanding quantitative information or the widespread positive value  
25 placed on cancer screening can produce a certain resistance to information on  
26 possible harms. Their study was the only one obtaining a significant increase in the  
27 amount of women remaining undecided about being screened in the group receiving  
28 information on overdiagnosis.  
29  
30  
31  
32  
33  
34  
35  
36  
37  
38

39 The DAs of the included studies lacked detailed information on the outcomes of  
40 screening, detection, treatment, or financial strain and opportunity costs from the  
41 perspective of the society, which could be considered important for inclusion in future  
42 DAs.  
43  
44  
45  
46

## 47 **Conclusions**

48  
49  
50 DAs for breast cancer screening can improve knowledge and promote informed  
51 decision making, in accordance with their preferences, for women who face the  
52 decision of screening. However we found divergent results on decisional conflict and  
53 decision confidence. Under the new paradigm, which favours informed choice rather  
54 than maximising uptake, more research is necessary for the improvement of DA.  
55  
56  
57  
58  
59  
60



## Figure legends

Figure 1: Study flow diagram

Figure 2: Meta-analysis of risk differences for the dichotomous outcomes (random effects model)

Figure 2 footnote

Heterogeneity measures: Informed choice:  $I^2=74.7\%$ , Q test p-value=0.047; Knowledge:  $I^2=0\%$ , Q test p-value=0.75; Positive attitudes:  $I^2=84.6\%$ , Q test p-value=0.011; Undecided:  $I^2=96.9\%$ , Q test p-value<0.001; Intention to be screened:  $I^2=75.9\%$ , Q test p-value=0.008.

Figure 3: Meta-analysis of mean differences in scores for the quantitative outcomes (random effects model)

Figure 3 footnote

Heterogeneity measures: Decision conflict:  $I^2=99.0\%$ , Q test p<0.001; Decision confidence:  $I^2=98.3\%$ , Q test p<0.001; Knowledge:  $I^2=75.7\%$ , Q test p=0.030.

## The InforMa Group

The members of the InforMa Study Group are (alphabetical order): ÀreaQ, Evaluation and Qualitative Research, Barcelona: Àngels Cardona, Núria Codern. Canary Islands Health Service (SESCS): Lilisbeth Perestelo, Ana Toledo. Universitat Autònoma de

1  
2  
3 *Barcelona (UAB):* Maria Feijoo. *Cancer Prevention and Control Program, Catalan*  
4 *Institute of Oncology, L'Hospitalet de Llobregat, Barcelona:* Montse García, Carmen  
5 Vidal. *IRBLLEIDA-Universitat de Lleida:* Sara Buil, Clara Vinyals, Laia Vinyals,  
6 Montserrat Martínez-Alonso, Marta Ortega, Sandra Pla, Anna Pons-Rodríguez,  
7 Montserrat Rué, Jorge Soler. *URV (University Rovira i Virgili), Reus:* Misericòrdia Carles,  
8 Maria José Pérez, Roger Pla. *IMIM, Hospital del Mar Medical Research Institute,*  
9 *Barcelona:* Andrea Burón, Xavier Castells, Anabel Romero, Maria Sala.

### 16 17 18 **Competing interests**

19  
20  
21 All authors have completed the ICMJE uniform disclosure form at  
22 [www.icmje.org/coi\\_disclosure.pdf](http://www.icmje.org/coi_disclosure.pdf) and declare: funding from the Spanish Ministry of  
23 Health and the Biomedical Research Institute of Lleida (IRBLLEIDA) as described  
24 below; no financial relationships with any organisations that might have an interest in  
25 the submitted work in the previous three years; no other relationships or activities  
26 that could appear to have influenced the submitted work.

### 31 32 33 34 **Informed consent**

35  
36  
37 Since the work does not involve direct research in human subjects, informed consent  
38 was not obtained. Nevertheless, the study was approved by the Ethics Committee of  
39 the Hospital Universitari Arnau de Vilanova in the city of Lleida (Spain).

### 41 42 43 44 **Contributors and authorship**

45  
46  
47 MMA, MC and MR designed the study. All authors contributed towards the execution  
48 of the study. MMA provided methodological expertise in systematic reviews and  
49 searching strategies. The selection and risk of bias assessment of each study was  
50 independently conducted in pairs by four reviewers (MC, MJP, MMA, and MR). AP  
51 contributed to extracting the information of the identified studies and assessing the  
52 inclusion criteria. MMA and MR wrote the first draft with guidance and contributions

1  
2  
3 from MC, MJP, and MG. All authors read, provided critical feedback and approved the  
4  
5 final manuscript.  
6  
7

## 8 9 **Acknowledgements**

10  
11 We thank Drs. Karen Eden and Jolyn Hersch for facilitating non-published data that  
12 enabled us to obtain summary measures of some outcomes in the performed meta-  
13 analyses, and Krystal A. Klein, PhD for her support in the Eden study data. We are  
14 indebted to Ivan Solà, from the Iberoamerican Cochrane Centre, for performing the  
15 search in the EMBASE, PsycINFO and CINAHL databases. We also thank Maria Feijoo-  
16 Cid, PhD and the manuscript reviewers for their insightful comments to the previous  
17 version of the manuscript, and JP Glutting for review and editing.  
18  
19  
20  
21  
22  
23  
24  
25  
26  
27  
28

## 29 **Data Sharing Statement**

30  
31 No additional data available.  
32  
33  
34

## 35 **Funding**

36  
37 This study was supported by the research grant “Women participation in decisions  
38 and strategies on early detection of breast cancer” (PI14/00113) from the Instituto de  
39 Salud Carlos III and cofunded by Fondo Europeo de Desarrollo Regional (FEDER) “Una  
40 manera de hacer Europa”. Anna Pons received a grant for PhD students from the  
41 Lleida Biomedical Research Institute (IRBLLEIDA).  
42  
43  
44  
45  
46  
47  
48  
49  
50  
51  
52  
53  
54  
55  
56  
57  
58  
59  
60

## References

1. Rutqvist LE, Miller A, Andersson I, et al. Reduced breast-cancer mortality with mammography screening—an assessment of currently available data. *Int J Cancer* 1990;55:76-84.
2. Gotzsche PC, Olsen O. Is screening for breast cancer with mammography justifiable? *Lancet* 2000;355:129-134.
3. Berry DA, Cronin KA, Plevritis SK, et al. Effect of screening and adjuvant therapy on mortality from breast cancer. *N Engl J Med* 2005;353:1784-1792.
4. Siu A, U.S. Preventive Services Task Force. Screening for breast cancer: USPSTF recommendation statement. *Ann Intern Med* 2016;164:279-296.
5. Nelson HD, Fu R, Cantor A, Pappas M, Daegas M, Humphrey L. Effectiveness of breast cancer screening: systematic review and meta-analysis to update the 2009 U.S. Preventive Services Task Force recommendation. *Ann Intern Med* 2016;164:244-255.
6. Marmot MG, Altman DG, Cameron DA, Dewar JA, Thompson SG, Wilcox M. The benefits and harms of breast cancer screening: an independent review. *Br J Cancer* 2013;108:2205-2240.
7. Gotzsche PC, Jorgensen KJ. Screening for breast cancer with mammography. *Cochrane Database Syst Rev* 2013;6:CD001877.
8. Nelson HD, Pappas M, Cantor A, Griffin J, Daegas M, Humphrey L. Harms of breast cancer screening: systematic review to update the 2009 U.S. Preventive Services Task Force recommendation. *Ann Intern Med* 2016;164:256-267.9. Stefanek ME. Uninformed compliance or informed choice? A needed shift in our approach to cancer screening *J Natl Cancer Inst* 2011;103:1821-1826.
10. Strech D. Participation rate or informed choice? Rethinking the European key performance indicators for mammography screening. *Health Policy* 2014;115:100-103.

- 1  
2  
3 11. Hersch J, Barratt A, Jansen J, et al. Use of a decision aid including information on  
4 overdetected to support informed choice about breast cancer screening: a  
5 randomised controlled trial. *Lancet* 2015;385:1642-1652.  
6  
7  
8  
9  
10 12. Moynihan R, Nickel B, Hersch J, et al. Public opinions about overdiagnosis : A  
11 national community survey. *PLoS One* 2015;10(e0125165):1-13.  
12 doi:[10.1371/journal.pone.0125165](https://doi.org/10.1371/journal.pone.0125165).  
13  
14  
15  
16 13. Vilaprinoy E, Forné C, Carles M, et al. Cost-effectiveness and harm-benefit analyses  
17 of risk-based screening strategies for breast cancer. *PLoS One* 2014;9:e86858. doi:  
18 [10.1371/journal.pone.0086858](https://doi.org/10.1371/journal.pone.0086858).  
19  
20  
21  
22 14. Schousboe JT, Kerlikowske K, Loh A, Cummings SR. Personalizing mammography  
23 by breast density and other risk factors for breast cancer: analysis of health benefits  
24 and cost-effectiveness. *Ann Intern Med* 2011;155:10-20.  
25  
26  
27  
28 15. Ayer T, Alagoz O, Stout NK. OR Forum—A POMDP approach to personalize  
29 mammography screening decisions. *Operations Research* 2012;60:1019-1034.  
30  
31  
32  
33 16. Evans DG, Astley S, Stavrinou P, et al. *Improvement in risk prediction, early*  
34 *detection and prevention of breast cancer in the NHS Breast Screening Programme and*  
35 *Family History Clinic: A dual cohort study*. Southampton (UK): NIHR Journals Library:  
36 Programme Grants for Applied Research, No. 4.11; 2016.  
37  
38  
39  
40  
41 17. Wu YY, Yen MF, Yu CP, Chen HH. Individually tailored screening of breast cancer  
42 with genes, tumour phenotypes, clinical attributes, and conventional risk factors. *Br J*  
43 *Cancer* 2013;108:2241-2249.  
44  
45  
46  
47 18. Stacey D, Légaré F, Lewis K, et al. Decision aids for people facing health treatment  
48 or screening decisions. *Cochrane Database Syst Rev* 2017; Issue 4. Art. No.: CD001431.  
49 doi: [10.1002/14651858.CD001431.pub5](https://doi.org/10.1002/14651858.CD001431.pub5).  
50  
51  
52  
53 19. Dreier M, Borutta B, Seidel G, Mu I, Dierks M-I, Walter U. Communicating the  
54 benefits and harms of colorectal cancer screening needed for an informed choice : A  
55  
56  
57  
58  
59  
60

1  
2  
3 systematic evaluation of leaflets and booklets. *PLoS One* 2014;9.

4  
5 doi:[10.1371/journal.pone.0107575](https://doi.org/10.1371/journal.pone.0107575).

6  
7  
8 20. Gummersbach E, Schmitt J in der, Mortsiefer A, Abholz H-H, Wegscheider K,  
9 Pentzek M. Willingness to participate in mammography screening: a randomized  
10 controlled questionnaire study of responses to two patient information leaflets with  
11 different factual content. *Deutsches Ärzteblatt international* 2015;112:61-68.

12  
13  
14  
15  
16 21. National Institutes of Health. Quality Assessment Tool for before-after (pre-post)  
17 studies with no control group. Study Quality Assessment Tools.

18  
19  
20 [https://www.nhlbi.nih.gov/health-pro/guidelines/in-develop/cardiovascular-risk-](https://www.nhlbi.nih.gov/health-pro/guidelines/in-develop/cardiovascular-risk-reduction/tools/before-after)  
21 [reduction/tools/before-after](https://www.nhlbi.nih.gov/health-pro/guidelines/in-develop/cardiovascular-risk-reduction/tools/before-after) (accessed 11 May 2017).

22  
23 22. Moher D, Liberati A, Tetzlaff  
24 J, Altman DG, the PRISMA Group. Preferred reporting items for systematic reviews and  
25 meta-analyses: the PRISMA statement. *Int J Surg* 2010;8:336-341.

26  
27  
28 23. R Core Team. R: A language and environment for statistical computing. R  
29 Foundation for Statistical Computing, Vienna, Austria 2017. URL [https://www.R-](https://www.R-project.org/)  
30 [project.org/](https://www.R-project.org/).

31  
32  
33  
34 24. Mathieu E, Barratt A, McGeechan K, Davey H, Howard K, Houssami N. Helping  
35 women make choices about mammography screening: an online randomized trial of a  
36 decision aid for 40-year-old women. *Patient Educ Couns* 2010;81:63-72.

37  
38  
39  
40 25. Eden KB, Scariati P, Klein K, et al. Mammography decision aid reduces decisional  
41 conflict for women in their forties considering screening. *J Womens Health*  
42 2015;24:1013-1020.

43  
44  
45  
46 26. Ivlev I, Hickman EN, McDonagh MS, Eden KB. Women's change in intention to  
47 undergo screening mammography after using a patient decision aid: a systematic  
48 review and meta-analysis. *J Gen Intern Med* 2017; doi: 10.1007/s11606-017-4027-9

49  
50  
51  
52  
53 27. Gummersbach E, in der Schmitt J, Abholz H-H, Wegscheider K, Pentzek M.  
54 Effects of different information brochures on women's decision-making regarding  
55

1  
2  
3  
4  
5  
6  
7  
8  
9  
10  
11  
12  
13  
14  
15  
16  
17  
18  
19  
20  
21  
22  
23  
24  
25  
26  
27  
28  
29  
30  
31  
32  
33  
34  
35  
36  
37  
38  
39  
40  
41  
42  
43  
44  
45  
46  
47  
48  
49  
50  
51  
52  
53  
54  
55  
56  
57  
58  
59  
60

mammography screening: study protocol for a randomized controlled questionnaire study. *Trials* 2013;14:319. doi: 10.1186/1745-6215-14-319.

For peer review only

1  
2  
3  
4  
5  
6  
7  
8  
9  
10  
11  
12  
13  
14  
15  
16  
17  
18  
19  
20  
21  
22  
23  
24  
25  
26  
27  
28  
29  
30  
31  
32  
33  
34  
35  
36  
37  
38  
39  
40  
41  
42  
43  
44  
45  
46  
47  
48  
49  
50  
51  
52  
53  
54  
55  
56  
57  
58  
59  
60



290x206mm (300 x 300 DPI)

Review only



1  
2  
3  
4  
5  
6  
7  
8  
9  
10  
11  
12  
13  
14  
15  
16  
17  
18  
19  
20  
21  
22  
23  
24  
25  
26  
27  
28  
29  
30  
31  
32  
33  
34  
35  
36  
37  
38  
39  
40  
41  
42  
43  
44  
45  
46  
47  
48  
49  
50  
51  
52  
53  
54  
55  
56  
57  
58  
59  
60



Figure 2: Meta-analysis of risk differences for the dichotomous outcomes (random effects model)

286x178mm (300 x 300 DPI)

Review only

1  
2  
3  
4  
5  
6  
7  
8  
9  
10  
11  
12  
13  
14  
15  
16  
17  
18  
19  
20  
21  
22  
23  
24  
25  
26  
27  
28  
29  
30  
31  
32  
33  
34  
35  
36  
37  
38  
39  
40  
41  
42  
43  
44  
45  
46  
47  
48  
49  
50  
51  
52  
53  
54  
55  
56  
57  
58  
59  
60



Figure 3: Meta-analysis of mean differences in scores for the quantitative outcomes (random effects model)

286x178mm (300 x 300 DPI)

Review only

## APPENDIX 1

### Search criteria for Decision Aids on breast cancer screening

1. In MEDLINE:  
 “breast cancer”[tiab] (decision[tiab] OR choice[tiab]) AND (aid[tiab] OR informed[tiab]) AND (mammography[tiab] OR mammogram[tiab]) NOT protocol[ti]
2. Adapting it to SCOPUS:  
 (TITLE-ABS-KEY (“breast cancer”) AND ( TITLE-ABS-KEY (decision) OR TITLE-ABS-KEY (choice) ) AND( TITLE-ABS-KEY (aid) OR TITLE-ABS-KEY (informed) ) AND ( TITLE-ABS-KEY (mammography) OR TITLE-ABS-KEY (mammogram) ) AND NOT TITLE (protocol )
3. And, equivalently for EMBASE, CINAHL, PsycInfo, and the Cochrane Library Plus.

## APPENDIX 2

**Table A2. 1:** Excluded studies after full text assessment

| Study           | Reason of exclusion                                                                                                                |
|-----------------|------------------------------------------------------------------------------------------------------------------------------------|
| Lawrence 2000   | No adequate evaluation of the decision aid (DA), only acceptability is assessed.                                                   |
| Webster 2007    | No adequate evaluation of the DA, no DA but a leaflet is assessed.                                                                 |
| Bodurtha 2009   | No adequate evaluation of the DA, no decision is assessed.                                                                         |
| Pasternack 2011 | No adequate evaluation of the DA, only acceptability is assessed.                                                                  |
| Waller 2013     | No adequate evaluation of the DA, only the design is described, no assessment is reported.                                         |
| Hersch 2014     | Pilot study of a main study already included.                                                                                      |
| Waller 2014     | No adequate evaluation of the DA, three formats of reporting information are compared.                                             |
| Berens 2015     | No adequate evaluation of the DA, no DA but a leaflet is assessed.                                                                 |
| Petrova 2015    | The DA is not assessed in a real context.                                                                                          |
| Bourmaud 2016   | No adequate evaluation of the DA. Informed choice is assessed only by participation rate. The overdiagnosis harm is not mentioned. |

## Characteristics of the included studies

**Table A2.2.** Study Characteristics

| <b>Mathieu 2010</b>                                       |                                                                                                                                                                                                                                                                                                     |                                                                                                                                                                                                                                                      |
|-----------------------------------------------------------|-----------------------------------------------------------------------------------------------------------------------------------------------------------------------------------------------------------------------------------------------------------------------------------------------------|------------------------------------------------------------------------------------------------------------------------------------------------------------------------------------------------------------------------------------------------------|
| <i>Methods</i>                                            | Online randomised controlled study of decision aid (DA) vs usual care (UC).                                                                                                                                                                                                                         |                                                                                                                                                                                                                                                      |
| <i>Setting</i>                                            | Australia, where biennial mammography screening is offered free of charge for all women over the age of 40, through a national population screening program. Women aged 50–69 years are invited by personal letter, and, women turning 40 are eligible for screening if they wish to start earlier. |                                                                                                                                                                                                                                                      |
| <i>Participants</i>                                       | 189 + 223 women, aged 38-45 years, who accessed the web site. Eligible if they were considering whether to (a) start screening in their 40s (ie before the recommended age of 50) or (b) wait until they were 50.                                                                                   |                                                                                                                                                                                                                                                      |
| <i>Interventions</i>                                      | DA: explained the benefits and harms, included a values clarification exercise and a worksheet to support decision making.<br>UC: delayed intervention                                                                                                                                              |                                                                                                                                                                                                                                                      |
| <i>Outcomes</i>                                           | Primary outcome: knowledge of benefits and harms of screening. Secondary outcomes: informed choice (composite of knowledge, values and intention), anxiety, acceptability of the DA, and intention regarding screening.                                                                             |                                                                                                                                                                                                                                                      |
| <b>Risk of bias</b>                                       |                                                                                                                                                                                                                                                                                                     |                                                                                                                                                                                                                                                      |
| <i>Bias</i>                                               | <i>Authors' judgement</i>                                                                                                                                                                                                                                                                           | <i>Support for judgement</i>                                                                                                                                                                                                                         |
| Random sequence generation (Selection bias)               | Low risk                                                                                                                                                                                                                                                                                            | Pg. 66 (randomization and baseline questions section): "computer generated simple randomization schedule".                                                                                                                                           |
| Allocation concealment (Selection bias)                   | Unclear risk                                                                                                                                                                                                                                                                                        | Pg. 66 "randomization was conducted in a concealed manner." The method of allocation concealment was not stated.                                                                                                                                     |
| Blinding of participants and personnel (Performance bias) | Unclear risk                                                                                                                                                                                                                                                                                        | Not reported                                                                                                                                                                                                                                         |
| Blinding of outcome assessment (Detection bias)           | Low risk                                                                                                                                                                                                                                                                                            | Unclear blinding but outcomes were not subjective to interpretation.                                                                                                                                                                                 |
| Incomplete outcomes' data. All outcomes (Attrition bias)  | Low risk                                                                                                                                                                                                                                                                                            | Table 2: all outcomes mentioned in the paper were reported in the Results section. Table 3: outcomes of anxiety and acceptability can be found. Page 69 explains missing data. Figures 1 and 2 provide the reasons for the exclusions in each group. |
| Selective reporting (Reporting bias)                      | Unclear risk                                                                                                                                                                                                                                                                                        | No mention of protocol.                                                                                                                                                                                                                              |
| Other bias (Sampling and other)                           | Low risk                                                                                                                                                                                                                                                                                            | Pg. 65: "To proceed, women were required to click in a box on the computer screen to indicate they had read the study information and were eligible to participate." The trial was advertised on various websites and in a radio program.            |

**Table A2.3.** Study Characteristics

| <b>Eden 2015</b>                                                                                                                                                                                                            |                                                                                                                                                                               |                            |
|-----------------------------------------------------------------------------------------------------------------------------------------------------------------------------------------------------------------------------|-------------------------------------------------------------------------------------------------------------------------------------------------------------------------------|----------------------------|
| <i>Methods</i>                                                                                                                                                                                                              | Observational study. Women were assessed before and after the decision aid (DA).                                                                                              |                            |
| <i>Setting</i>                                                                                                                                                                                                              | Three clinics in the Oregon Rural Practice-Based Research Network (ORPRN), USA.                                                                                               |                            |
| <i>Participants</i>                                                                                                                                                                                                         | 75 women aged 40-49 years with no known risk factors associated with high or moderate risks for breast cancer and no mammography during the previous year.                    |                            |
| <i>Interventions</i>                                                                                                                                                                                                        | The decision aid (Mammopad) included modules on breast cancer, mammography, risk assessment, and priority setting about screening.                                            |                            |
| <i>Outcomes</i>                                                                                                                                                                                                             | Primary outcome: decisional conflict measured before and after using DA. Secondary outcomes: decision self-efficacy and intention to begin or continue mammography screening. |                            |
| <b>Criteria</b>                                                                                                                                                                                                             | <b>Yes/No</b>                                                                                                                                                                 | <b>Other (CD, NR, NA)*</b> |
| 1. Was the study question or objective clearly stated?                                                                                                                                                                      | Yes                                                                                                                                                                           |                            |
| 2. Were eligibility/selection criteria for the study population prespecified and clearly described?                                                                                                                         | Yes                                                                                                                                                                           |                            |
| 3. Were the participants in the study representative of those who would be eligible for the test/service/intervention in the general or clinical population of interest?                                                    | No                                                                                                                                                                            |                            |
| 4. Were all eligible participants that met the prespecified entry criteria enrolled?                                                                                                                                        | No                                                                                                                                                                            |                            |
| 5. Was the sample size sufficiently large to provide confidence in the findings?                                                                                                                                            | Yes                                                                                                                                                                           |                            |
| 6. Was the test/service/intervention clearly described and delivered consistently across the study population?                                                                                                              | Yes                                                                                                                                                                           |                            |
| 7. Were the outcome measures prespecified, clearly defined, valid, reliable, and assessed consistently across all study participants?                                                                                       | Yes                                                                                                                                                                           |                            |
| 8. Were the people assessing the outcomes blinded to the participants' exposures/interventions?                                                                                                                             | No                                                                                                                                                                            |                            |
| 9. Was the loss to follow-up after baseline 20% or less? Were those lost to follow-up accounted for in the analysis?                                                                                                        | Yes                                                                                                                                                                           |                            |
| 10. Did the statistical methods examine changes in outcome measures from before to after the intervention? Were statistical tests done that provided p values for the pre-to-post changes?                                  | Yes                                                                                                                                                                           |                            |
| 11. Were outcome measures of interest taken multiple times before the intervention and multiple times after the intervention (i.e., did they use an interrupted time-series design)?                                        | No                                                                                                                                                                            |                            |
| 12. If the intervention was conducted at a group level (e.g., a whole hospital, a community, etc.) did the statistical analysis take into account the use of individual-level data to determine effects at the group level? |                                                                                                                                                                               | NA                         |

\*CD, cannot determine; NA, not applicable; NR, not reported

National Institutes of Health. Quality Assessment Tool for before-after (pre-post) studies with no control group. Study Quality Assessment Tools. <https://www.nhlbi.nih.gov/health->

pro/guidelines/in-develop/cardiovascular-risk-reduction/tools/before-after. Accessed 11 May 2017.

**Table A2.4.** Study Characteristics

| <b>Gummersbach 2015</b>                                   |                                                                                                                                                            |                                                                                                                                                                                   |
|-----------------------------------------------------------|------------------------------------------------------------------------------------------------------------------------------------------------------------|-----------------------------------------------------------------------------------------------------------------------------------------------------------------------------------|
| <i>Methods</i>                                            | Randomised to two decision aids (DA) with different information.                                                                                           |                                                                                                                                                                                   |
| <i>Setting</i>                                            | Family practices in the German federal state of North Rhine–Westphalia. In Germany, screening is recommended biennially for all women aged 50 to 69.       |                                                                                                                                                                                   |
| <i>Participants</i>                                       | 353 women, aged 48-49 years, about to receive the first invitation to screening.                                                                           |                                                                                                                                                                                   |
| <i>Interventions</i>                                      | Intervention: DA with detailed information on screening harms.<br>Control: standard DA.                                                                    |                                                                                                                                                                                   |
| <i>Outcomes</i>                                           | Primary outcome: willingness to participate in screening.<br>Secondary outcomes: knowledge, decisional confidence, determinants of the screening decision. |                                                                                                                                                                                   |
| <b>Risk of bias</b>                                       |                                                                                                                                                            |                                                                                                                                                                                   |
| <i>Bias</i>                                               | <i>Authors' judgement</i>                                                                                                                                  | <i>Support for judgement</i>                                                                                                                                                      |
| Random sequence generation (Selection bias)               | Low risk                                                                                                                                                   | Pg. 62: "The 24 participants from each practice were selected by a computer-assisted random procedure."                                                                           |
| Allocation concealment (Selection bias)                   | Low risk                                                                                                                                                   | Pg. 62: the group allotment process was also random.                                                                                                                              |
| Blinding of participants and personnel (Performance bias) | Low risk                                                                                                                                                   | Pg. 62: "The participants and their family physicians were blinded with respect to group allotment, but the study team was not".                                                  |
| Blinding of outcome assessment (Detection bias)           | Low risk                                                                                                                                                   | Pg. 62: "The participants were asked by letter to fill out the questionnaire after reading the leaflet and to send it back in an envelope that was also enclosed in the mailing". |
| Incomplete outcomes' data. All outcomes (Attrition bias)  | High risk                                                                                                                                                  | 46.7% non-response.                                                                                                                                                               |
| Selective reporting (Reporting bias)                      | Low risk                                                                                                                                                   | Pg. 63. Primary outcome was assessed in accordance with the protocol.                                                                                                             |
| Other bias (sampling bias)                                | Low risk                                                                                                                                                   | Participants recruited from family practices.                                                                                                                                     |

**Table A2.5.** Study Characteristics

| <b>Hersch 2015</b>                                        |                                                                                                                                                                                                                                                                                                |                                                                                                                                                                                                                                                                                                              |
|-----------------------------------------------------------|------------------------------------------------------------------------------------------------------------------------------------------------------------------------------------------------------------------------------------------------------------------------------------------------|--------------------------------------------------------------------------------------------------------------------------------------------------------------------------------------------------------------------------------------------------------------------------------------------------------------|
| <i>Methods</i>                                            | Randomised to two decision aids (DA) with different information.                                                                                                                                                                                                                               |                                                                                                                                                                                                                                                                                                              |
| <i>Setting</i>                                            | Community-based sample of women around the target age for starting breast screening, in New South Wales, Australia.                                                                                                                                                                            |                                                                                                                                                                                                                                                                                                              |
| <i>Participants</i>                                       | 879 women, aged 48-50 years, about to receive the first invitation to screening.                                                                                                                                                                                                               |                                                                                                                                                                                                                                                                                                              |
| <i>Interventions</i>                                      | Intervention: comprising evidence-based explanatory and quantitative information on overdetection, breast cancer mortality reduction, and false positives.<br>Control: decision aid including information on breast cancer mortality reduction and false positives.                            |                                                                                                                                                                                                                                                                                                              |
| <i>Outcomes</i>                                           | Primary outcome: informed choice defined as adequate knowledge and consistency between attitudes and screening intentions. Secondary outcomes: screening attitudes, decisional conflict, worry about breast cancer, intention about undergoing screening, and opinions about the decision aid. |                                                                                                                                                                                                                                                                                                              |
| <b>Risk of bias</b>                                       |                                                                                                                                                                                                                                                                                                |                                                                                                                                                                                                                                                                                                              |
| <i>Bias</i>                                               | <i>Authors' judgement</i>                                                                                                                                                                                                                                                                      | <i>Support for judgement</i>                                                                                                                                                                                                                                                                                 |
| Random sequence generation (Selection bias)               | Low risk                                                                                                                                                                                                                                                                                       | Pg. 1644: "A programmer who had no contact with participants generated the randomisation sequence using a computer system that was inaccessible until after recruitment... We assigned participants to either the intervention or control group in a 1:1 ratio with permuted block sizes of four and eight." |
| Allocation concealment (Selection bias)                   | Low risk                                                                                                                                                                                                                                                                                       | Pg. 1645: "Interviewers were unaware of the materials that women would receive (ensuring allocation concealment)."                                                                                                                                                                                           |
| Blinding of participants and personnel (Performance bias) | Low risk                                                                                                                                                                                                                                                                                       | Pg. 1645: "Double blinded. Women knew they would receive one of two versions of an information booklet but did not know how these differed or which one was the intervention. We designed the follow-up interview to ensure the group assignment was unclear to the interviewer until the final question."   |
| Blinding of outcome assessment (Detection bias)           | Low risk                                                                                                                                                                                                                                                                                       | Pg. 1645: "Researchers who analysed data were unaware of the random allocation."                                                                                                                                                                                                                             |
| Incomplete outcomes' data. All outcomes (Attrition bias)  | Low risk                                                                                                                                                                                                                                                                                       | Both groups have similar dropout rates.                                                                                                                                                                                                                                                                      |
| Selective reporting (Reporting bias)                      | Low risk                                                                                                                                                                                                                                                                                       | Pg. 5. Primary outcome was assessed in accordance with the protocol.                                                                                                                                                                                                                                         |
| Other bias                                                | Low risk                                                                                                                                                                                                                                                                                       | It seems free of other biases.                                                                                                                                                                                                                                                                               |

## APPENDIX 3

**Table A3.1.** Mean differences for the quantitative outcome decisional confidence. Meta-analysis of the RCTs.

| Outcome               | Study                         | Group        | N   | Mean (SD)   | Difference, p-value               |
|-----------------------|-------------------------------|--------------|-----|-------------|-----------------------------------|
| Decisional confidence | Gummersbach 2015 <sup>a</sup> | Intervention | 178 | 5.15 (1.36) | -0.37, p=0.017                    |
|                       |                               | Control      | 182 | 5.52 (0.93) |                                   |
|                       | Hersch 2015 <sup>b</sup>      | Intervention | 419 | 4.35 (0.74) | -0.18, p=0.0003                   |
|                       |                               | Control      | 419 | 4.53 (0.67) |                                   |
| Summary               |                               |              |     |             | -0.42 [-0.64, -0.21] <sup>c</sup> |

Heterogeneity measures:  $I^2=21.7\%$ , Q test  $p=0.26$ .

<sup>a</sup> Confidence scale, range 0- 6.

<sup>b</sup> Confidence scale, range 0- 5 (mean of 3 subscales).

<sup>c</sup> Once re-scaled to a maximum score of 10.

**Table A3.2.** Risk differences for the dichotomous outcome screening intentions. Meta-analysis of the RCTs.

| Outcome                | Study            | Group        | Assessed | n (%)       | Difference, p-value <sup>a</sup> |
|------------------------|------------------|--------------|----------|-------------|----------------------------------|
| Decided to be screened | Mathieu 2010     | Intervention | 117      | 50 (42.7%)  | 3.0% <sup>a</sup> , p=0.64       |
|                        |                  | Control      | 209      | 83 (39.7%)  |                                  |
|                        | Gummersbach 2015 | Intervention | 178      | 145 (81.5%) | -7.1%, p=0.06                    |
|                        |                  | Control      | 175      | 155 (88.6%) |                                  |
|                        | Hersch 2015      | Intervention | 419      | 308 (73.5%) | -13.1%, p<0.001                  |
|                        |                  | Control      | 419      | 363 (86.6%) |                                  |
| Summary                |                  |              |          |             | -7% [-15%, -2%]                  |

<sup>a</sup> Fisher's exact test. Heterogeneity measures:  $I^2=73.7\%$ , Q test  $p=0.030$ .





# PRISMA 2009 Checklist

| Section/topic                      | #  | Checklist item                                                                                                                                                                                                                                                                                              | Reported on page # |
|------------------------------------|----|-------------------------------------------------------------------------------------------------------------------------------------------------------------------------------------------------------------------------------------------------------------------------------------------------------------|--------------------|
| <b>TITLE</b>                       |    |                                                                                                                                                                                                                                                                                                             |                    |
| Title                              | 1  | Identify the report as a systematic review, meta-analysis, or both.                                                                                                                                                                                                                                         | 1                  |
| <b>ABSTRACT</b>                    |    |                                                                                                                                                                                                                                                                                                             |                    |
| Structured summary                 | 2  | Provide a structured summary including, as applicable: background; objectives; data sources; study eligibility criteria, participants, and interventions; study appraisal and synthesis methods; results; limitations; conclusions and implications of key findings; systematic review registration number. | 2                  |
| <b>INTRODUCTION</b>                |    |                                                                                                                                                                                                                                                                                                             |                    |
| Rationale                          | 3  | Describe the rationale for the review in the context of what is already known.                                                                                                                                                                                                                              | 4-5                |
| Objectives                         | 4  | Provide an explicit statement of questions being addressed with reference to participants, interventions, comparisons, outcomes, and study design (PICOS).                                                                                                                                                  | 5                  |
| <b>METHODS</b>                     |    |                                                                                                                                                                                                                                                                                                             |                    |
| Protocol and registration          | 5  | Indicate if a review protocol exists, if and where it can be accessed (e.g., Web address), and, if available, provide registration information including registration number.                                                                                                                               | -                  |
| Eligibility criteria               | 6  | Specify study characteristics (e.g., PICOS, length of follow-up) and report characteristics (e.g., years considered, language, publication status) used as criteria for eligibility, giving rationale.                                                                                                      | 6                  |
| Information sources                | 7  | Describe all information sources (e.g., databases with dates of coverage, contact with study authors to identify additional studies) in the search and date last searched.                                                                                                                                  | 7                  |
| Search                             | 8  | Present full electronic search strategy for at least one database, including any limits used, such that it could be repeated.                                                                                                                                                                               | 7                  |
| Study selection                    | 9  | State the process for selecting studies (i.e., screening, eligibility, included in systematic review, and, if applicable, included in the meta-analysis).                                                                                                                                                   | 7                  |
| Data collection process            | 10 | Describe method of data extraction from reports (e.g., piloted forms, independently, in duplicate) and any processes for obtaining and confirming data from investigators.                                                                                                                                  | 7                  |
| Data items                         | 11 | List and define all variables for which data were sought (e.g., PICOS, funding sources) and any assumptions and simplifications made.                                                                                                                                                                       | 7                  |
| Risk of bias in individual studies | 12 | Describe methods used for assessing risk of bias of individual studies (including specification of whether this was done at the study or outcome level), and how this information is to be used in any data synthesis.                                                                                      | 7-8                |
| Summary measures                   | 13 | State the principal summary measures (e.g., risk ratio, difference in means).                                                                                                                                                                                                                               | 8                  |
| Synthesis of results               | 14 | Describe the methods of handling data and combining results of studies, if done, including measures of consistency (e.g., $I^2$ for each meta-analysis).                                                                                                                                                    | 8                  |



# PRISMA 2009 Checklist

Page 1 of 2

| Section/topic                 | #  | Checklist item                                                                                                                                                                                           | Reported on page # |
|-------------------------------|----|----------------------------------------------------------------------------------------------------------------------------------------------------------------------------------------------------------|--------------------|
| Risk of bias across studies   | 15 | Specify any assessment of risk of bias that may affect the cumulative evidence (e.g., publication bias, selective reporting within studies).                                                             | -                  |
| Additional analyses           | 16 | Describe methods of additional analyses (e.g., sensitivity or subgroup analyses, meta-regression), if done, indicating which were pre-specified.                                                         | -                  |
| <b>RESULTS</b>                |    |                                                                                                                                                                                                          |                    |
| Study selection               | 17 | Give numbers of studies screened, assessed for eligibility, and included in the review, with reasons for exclusions at each stage, ideally with a flow diagram.                                          | 8                  |
| Study characteristics         | 18 | For each study, present characteristics for which data were extracted (e.g., study size, PICOS, follow-up period) and provide the citations.                                                             | 9-11               |
| Risk of bias within studies   | 19 | Present data on risk of bias of each study and, if available, any outcome level assessment (see item 12).                                                                                                | 11                 |
| Results of individual studies | 20 | For all outcomes considered (benefits or harms), present, for each study: (a) simple summary data for each intervention group (b) effect estimates and confidence intervals, ideally with a forest plot. | 12-15              |
| Synthesis of results          | 21 | Present results of each meta-analysis done, including confidence intervals and measures of consistency.                                                                                                  | 12-15              |
| Risk of bias across studies   | 22 | Present results of any assessment of risk of bias across studies (see Item 15).                                                                                                                          | -                  |
| Additional analysis           | 23 | Give results of additional analyses, if done (e.g., sensitivity or subgroup analyses, meta-regression [see Item 16]).                                                                                    | -                  |
| <b>DISCUSSION</b>             |    |                                                                                                                                                                                                          |                    |
| Summary of evidence           | 24 | Summarize the main findings including the strength of evidence for each main outcome; consider their relevance to key groups (e.g., healthcare providers, users, and policy makers).                     | 15-16              |
| Limitations                   | 25 | Discuss limitations at study and outcome level (e.g., risk of bias), and at review-level (e.g., incomplete retrieval of identified research, reporting bias).                                            | 17-18              |
| Conclusions                   | 26 | Provide a general interpretation of the results in the context of other evidence, and implications for future research.                                                                                  | 18                 |
| <b>FUNDING</b>                |    |                                                                                                                                                                                                          |                    |
| Funding                       | 27 | Describe sources of funding for the systematic review and other support (e.g., supply of data); role of funders for the systematic review.                                                               | 21                 |

From: Moher D, Liberati A, Tetzlaff J, Altman DG, The PRISMA Group (2009). Preferred Reporting Items for Systematic Reviews and Meta-Analyses: The PRISMA Statement. PLoS Med 6(6): e1000097. doi:10.1371/journal.pmed1000097

For more information, visit: [www.prisma-statement.org](http://www.prisma-statement.org).

Page 2 of 2

For peer review only - <http://bmjopen.bmj.com/site/about/guidelines.xhtml>
